# Supplementary material for: Antibiotic use and bacterial complications following upper respiratory tract infections: a population-based study
Source: PubMed Central journal article supplement — BMJ Open. 2017 Nov 15;7(11):e016221. doi: 10.1136/bmjopen-2017-016221 (PMC5695332; doi:10.1136/bmjopen-2017-016221), 2017-11-15

# BMJ Open

BMJ Open is committed to open peer review. As part of this commitment we make the peer review history of every article we publish publicly available.

When an article is published we post the peer reviewers' comments and the authors' responses online. We also post the versions of the paper that were used during peer review. These are the versions that the peer review comments apply to.

The versions of the paper that follow are the versions that were submitted during the peer review process. They are not the versions of record or the final published versions. They should not be cited or distributed as the published version of this manuscript.

BMJ Open is an open access journal and the full, final, typeset and author-corrected version of record of the manuscript is available on our site with no access controls, subscription charges or pay-per-view fees (<http://bmjopen.bmj.com>).

If you have any questions on BMJ Open's open peer review process please email [editorial.bmjopen@bmj.com](mailto:editorial.bmjopen@bmj.com)

# BMJ Open

## Antibiotic use and bacterial complications following upper respiratory tract infections: a population based study

|                                 |                                                                                                                                                                                                                                                                                                                                                                                                         |
|---------------------------------|---------------------------------------------------------------------------------------------------------------------------------------------------------------------------------------------------------------------------------------------------------------------------------------------------------------------------------------------------------------------------------------------------------|
| Journal:                        | <i>BMJ Open</i>                                                                                                                                                                                                                                                                                                                                                                                         |
| Manuscript ID                   | bmjopen-2017-016221                                                                                                                                                                                                                                                                                                                                                                                     |
| Article Type:                   | Research                                                                                                                                                                                                                                                                                                                                                                                                |
| Date Submitted by the Author:   | 14-Feb-2017                                                                                                                                                                                                                                                                                                                                                                                             |
| Complete List of Authors:       | Cars, Thomas; Department of Healthcare Development, Eriksson, Irene; Karolinska Institutet, Granath, Anna; Karolinska Institutet, Department of Clinical Science, Intervention and Technology Wettermark, B; Stockholm County Council, Public Healthcare Services Committee Hellman, Jenny; Public Health Agency of Sweden Norman, Christer; Folkhalsomyndigheten Ternhag, Anders; Folkhalsomyndigheten |
| <b>Primary Subject Heading</b>: | Epidemiology                                                                                                                                                                                                                                                                                                                                                                                            |
| Secondary Subject Heading:      | Infectious diseases                                                                                                                                                                                                                                                                                                                                                                                     |
| Keywords:                       | EPIDEMIOLOGY, Epidemiology < INFECTIOUS DISEASES, Infection control < INFECTIOUS DISEASES                                                                                                                                                                                                                                                                                                               |
|                                 |                                                                                                                                                                                                                                                                                                                                                                                                         |

SCHOLARONE™  
Manuscripts

only

## Antibiotic use and bacterial complications following upper respiratory tract infections: a population based study

Thomas Cars, PhD<sup>1</sup>, Irene Eriksson, pharmacist<sup>1,2</sup>, Anna Granath, ENT surgeon<sup>3</sup>, Björn Wettermark<sup>1,2</sup>, associate professor in pharmacoepidemiology, Jenny Hellman, pharmacist<sup>4</sup>, Christer Norman, general practitioner<sup>4</sup>, Anders Ternhag, consultant in infectious diseases<sup>2,4</sup>

<sup>1</sup> Department of Healthcare Development, Public Healthcare Services Committee, Stockholm County Council, Stockholm, Sweden

<sup>2</sup> Department of Medicine Solna, Karolinska Institutet, Stockholm, Sweden

<sup>3</sup> Department of Clinical Science, Intervention and Technology, Karolinska Institutet and Ear, Nose and Throat Clinic Karolinska University Hospital, Stockholm, Sweden

<sup>4</sup> Public Health Agency of Sweden, Solna, Sweden

Correspondence to: Thomas Cars, thomas.cars@sll.se

The Corresponding Author has the right to grant on behalf of all authors and does grant on behalf of all authors, a worldwide license to the Publishers and its licensees in perpetuity, in all forms, formats and media (whether known now or created in the future), to i) publish, reproduce, distribute, display and store the Contribution, ii) translate the Contribution into other languages, create adaptations, reprints, include within collections and create summaries, extracts and/or, abstracts of the Contribution, iii) create any other derivative work(s) based on the Contribution, iv) to exploit all subsidiary rights in the Contribution, v) the inclusion of electronic links from the Contribution to third party material where-ever it may be located; and, vi) licence any third party to do any or all of the above.

Patients were not directly involved in this study. General practitioners, specialists in infection diseases as well as representatives from health authorities were involved in the study design and the development of the outcome measure. There was no direct consumer involvement in this study. All data used in this study were anonymized, thus we do not know who the patients included in our analyses are. Therefore, the study results cannot be directly disseminated to the patients. We will however communicate the findings to the general practitioners and specialists in infection diseases involved in care of patients with upper respiratory tract infections.

For peer review only

1  
2  
3  
4  
5  
6  
7  
8  
9  
10  
11  
12  
13  
14  
15  
16  
17  
18  
19  
20  
21  
22  
23  
24  
25  
26  
27  
28  
29  
30  
31  
32  
33  
34  
35  
36  
37  
38  
39  
40  
41  
42  
43  
44  
45  
46  
47  
48  
49

## Abstract

### Objectives

To set up a process for continuous monitoring of the incidence of upper respiratory tract infections (URTIs), antibiotic use and the incidence of bacterial complications following URTIs, using routinely collected healthcare data, in order to monitor if more restricted utilization of antibiotics is associated with an increase in bacterial complications.

### Design

Ecological and a prospective cohort study.

### Setting

Primary, outpatient specialist and inpatient care in Stockholm County, Sweden. All analyses were based on administrative healthcare data on consultations, diagnoses and dispensed antibiotics from January, 2006, to January, 2016.

### Main outcome measures

Ecological study: 10 year trend analyses of the incidence of URTIs, bacterial infections/complications and respiratory antibiotic use.

Prospective cohort study: Incidence of bacterial complications following URTIs in antibiotic-exposed and non-exposed patients.

### Results

The utilization of respiratory tract antibiotics decreased by 22% from 2006 to 2015 but no increased trend for mastoiditis ( $p=0.0933$ ), peritonsillitis ( $p=0.0544$ ), invasive group A streptococcal disease ( $p=0.3991$ ), orbital abscess ( $p=0.9637$ ), extra- and subdural abscess ( $p=0.4790$ ) and pansinusitis ( $p=0.3971$ ) were observed. For meningitis and acute ethmoidal sinusitis, a decrease in the numbers of infections from 2006 to 2015 was observed ( $p=0.0038$  and  $p=0.0003$ , respectively) and for retropharyngeal and parapharyngeal abscess an increase was observed ( $p=0.0214$ ). Bacterial complications following URTIs were uncommon both in antibiotic-exposed (less than 1.5 per 10 000 episodes) and non-exposed patients (less than 1.3 per 10 000 episodes) with the exception of peritonsillitis after tonsillitis (risk per 10 000 tonsillitis episodes: 32.4 and 41.1 in patients with no antibiotic treatment and patients treated with antibiotics, respectively).

### Conclusions

Bacterial complications following URTIs are rare and antibiotics may lack protective effect in preventing bacterial complications. By using data of updated population based health care data one can provide continuous feedback on the number of URTIs, antibiotic use, and hospital complications to patients, prescribers and policymakers.

1  
2  
3  
4  
5  
6  
7  
8  
9  
10  
11  
12  
13  
14  
15  
16  
17  
18  
19  
20  
21  
22  
23  
24  
25  
26  
27  
28  
29  
30  
31  
32  
33  
34  
35  
36  
37  
38  
39  
40  
41  
42  
43  
44  
45  
46  
47  
48  
49

For peer review only

## Strengths and limitations of this study

Data used in this study are population based and include information from primary, outpatient specialist and inpatient care as well as data on all drugs dispensed in ambulatory care

Data are continuously updated and loss to follow-up is minimal (only when an individual moves out of the region)

Antibiotic exposure assessment is based on the information from the drug dispensation database; no information on antibiotics administered in hospitals was available for these analyses

Outcome definitions are based on recorded diagnoses thus this study relies on the accuracy and completeness of diagnoses data

It is unknown whether the individual completed the prescribed course of antibiotic treatment

## Introduction

The use of antibiotics contributes to the emergence and spread of drug-resistant bacteria(1-3). Curbing antibiotic resistance requires coordinated action at the global, national and regional levels(4). In Sweden, a comparatively low level of antibiotic utilization(5, 6) has been achieved through years of strategic work at the national and regional level that has included surveillance of antibiotic utilization and resistance trends, development and implementation of treatment guidelines as well as educational activities targeted at healthcare professionals, patients and the general public(7).

Most antibiotics prescribed in the Swedish primary care are used for treatment of respiratory tract infections(8). Over the past 20 years such use in Sweden has gradually declined(9). Most of this decline has been attributed to limiting the inappropriate antibiotic use in viral respiratory tract infections or mild self-healing bacterial infections(10) by the implementation of stricter guidelines, for example for pharyngotonsillitis and sinusitis(11-13). However, we know still that a substantial number of antibiotic prescriptions are issued by doctors “just in case” in fear of complications(14, 15). There is therefore a need for large studies on rare complications of upper respiratory tract infections (URTIs) in order to quantify these risks and hopefully to reduce some of the uncertainty for primary care physicians and their patients.

The objective of this study was to develop a process for continuous monitoring of the incidence URTIs, antibiotic use and the incidence of bacterial complications using routinely collected administrative healthcare data in order to monitor if more restricted utilization of antibiotics is associated with an increase in bacterial complications. First, we present results from an ecological analysis assessing whether the reduction in antibiotic use in URTIs were associated with a change in the incidence of bacterial complications in a large geographically defined population. Second, we present findings from a prospective cohort study based on individual patient level data describing the incidence of bacterial complications in antibiotic-exposed and non-exposed patients with URTIs.

## Methods

### Setting

We conducted both an ecological and a prospective cohort study in Stockholm County, Sweden, using administrative healthcare data from 1 January, 2006, to 31 January, 2016. The study was approved by the regional ethics committee at Karolinska Institutet, Sweden (Ref. no. 2015/158-31).



## Data sources

We used data from the regional healthcare data warehouse of Stockholm County (VAL)(16) and the Swedish Prescribed Drug Register(17). VAL contains comprehensive administrative healthcare data for all Stockholm County residents (around 2.2 million people, approximately 23% of the population of Sweden). From VAL we obtained the following information: demographic data (patient age and sex), diagnoses in primary care, outpatient specialist- and inpatient care (diagnoses are coded using the International Classification of Diseases [ICD-10] codes), consultation dates (for both in-person and phone consultations), hospital admission and discharge dates, as well as migration and death records. From the Swedish Prescribed Drug Register we obtained data on dispensed antibiotics (drugs are coded using the Anatomical Therapeutic Chemical [ATC] codes).

## Ecological study

For the ecological analyses we used aggregate level antibiotic utilization data (exposure) and data on the incidence of bacterial complications (outcome) between 1 January, 2006, and 31 December, 2015. We also assessed data on the incidence of URTIs during this period. We matched the exposure and outcomes data based on the year in which they were recorded. The list of antibiotics classified as those used to treat URTIs is provided in Supplement 1. The utilization of antibiotics was expressed as the defined daily dose (DDD) per 1000 inhabitants per day(18).

We studied the following bacterial complications: mastoiditis, meningitis, retropharyngeal and parapharyngeal abscess, invasive group A streptococcal disease, acute pansinusitis, acute ethmoidal sinusitis, orbital abscess, extradural abscess- and subdural abscess documented in inpatient care. For peritonsillar abscess, diagnoses recorded both in outpatient and in inpatient setting were included. The lists of ICD-10 codes used to define bacterial complications and primary URTIs are provided in Supplement 2 and Supplement 3, respectively.

## Prospective cohort study

### *Inclusion and exclusion criteria*

In the prospective cohort study we included all patients with a diagnosis of acute otitis media, tonsillitis, sinusitis or acute upper respiratory tract infections of multiple and unspecified sites diagnosed in the outpatient setting (primary care or outpatient specialist care) from 1 January, 2006, to 31 December, 2015 (see Supplement 3 for ICD-10 codes used to define the cohorts). The selected population was stratified into four sub-cohorts to study the incidence of bacterial complications in the antibiotic-exposed and non-exposed individuals: 1) acute otitis media cohort to study the incidence of mastoiditis and meningitis; 2) tonsillitis cohort to study the incidence of peritonsillar abscess, retropharyngeal and parapharyngeal abscess and invasive group A streptococcal disease; 3) acute sinusitis cohort to study the incidence of acute pansinusitis, orbital abscess and extra- and subdural abscess; 4) cohort of patients with sinusitis and acute upper respiratory tract infections of multiple and unspecified sites in combination to study the incidence of orbital cellulitis (without formation of abscess). This last combination cohort allowed

1  
2  
3 identifying complications to acute rhinosinusitis, mainly of ethmoidal origin not included in the acute sinusitis cohort (the majority of this  
4 combination cohort are children). In the widespread Swedish clinical practice children displaying symptoms and signs of an orbital complication  
5 in relation to an URTI (often of viral origin) are designated as cases of acute ethmoidal sinusitis (or other types of acute sinusitis) based on the  
6 clinical findings(19). In this paper and internationally, these complications are referred to as orbital cellulitis. The cohort selection flow chart can  
7 be found in Supplement 4.  
8  
9

### 10 **Episode definition**

11 Since more than one diagnosis of an URTI can be recorded for the same patient, an episode was created to combine data on diagnoses and treatment attributed to the same  
12 URTI and the start and the end dates were defined for each episode (  
13  
14

15 Figure 1).

16  
17 The episode start date (index date) was defined as the date of the first recorded diagnosis within the episode. If there was more than a month  
18 (30 day period used in all calculations) between diagnoses, the later diagnosis was attributed to a new URTI episode. The 30 day period was  
19 based on the Swedish guidelines on URTIs (sinusitis, acute otitis media, tonsillitis) stating that new symptoms within 30 days are a relapse and  
20 not a new episode. If a dispensation of antibiotic occurred within 3 days after the latest recorded diagnosis attributed to an episode (reflecting  
21 the strategy of watchful waiting), the date of antibiotic dispensation constituted the episode end date. If a bacterial complication occurred, the  
22 date of complication diagnosis constituted the episode end date.  
23  
24

25  
26 If a bacterial complication occurred on the same date as the episode start date this episode was excluded from our analyses. Furthermore,  
27 episodes with less than one month of follow-up were also excluded.  
28

29 For all bacterial complications, if more than 6 months passed between recorded diagnoses it was defined as an incident bacterial complication.  
30 The 6 month period was chosen in order to not miss any late bacterial complications. If more than 6 months passed since the primary URTI it is  
31 highly unlikely that any new signs and symptoms would be due to the primary URTI.  
32  
33

### 34 **Exposure groups**

35 Patients were considered exposed to respiratory tract antibiotics if a prescription was dispensed within the episode. An episode was not  
36 considered exposed to antibiotic if the first antibiotic prescription was dispensed on the same day as the suspected bacterial complication.  
37  
38

### 39 **Outcomes**

40 The follow-up of patients for study outcomes started at the episode start date (index date) and continued for a one month period after the  
41 episode end date.  
42  
43  
44  
45

1  
2  
3 The study outcomes included: 1) mastoiditis and meningitis diagnosed in inpatient setting (acute otitis media cohort); 2) peritonsillar abscess  
4 diagnosed in either outpatient or inpatient setting, retropharyngeal and parapharyngeal abscess and invasive group A streptococcal disease  
5 diagnosed in inpatient setting (tonsillitis cohort); 3) pansinusitis, orbital abscess and extra- and subdural abscess diagnosed in inpatient setting  
6 (sinusitis cohort); 4) orbital cellulitis diagnosed in inpatient setting (sinusitis and acute upper respiratory tract infections of multiple and  
7 unspecified sites in combination cohort). ICD-10 codes used to define bacterial complications are provided in Supplement 2.  
8  
9

## 10 11 **Statistical analyses**

12 For the ecological study, aggregate level of respiratory antibiotic utilization data (DDD per 1000 inhabitants per day, DID), number of bacterial  
13 complications per year as well as number of primary URTI episodes per year were plotted over time.  
14

15 Trends for bacterial complications and respiratory antibiotic utilization (using DDD as the measure of utilization) were investigated using  
16 negative binomial regression models with annual Stockholm County population counts (as of December 31 each year) as the offset variable.  
17  
18

19 For the prospective cohort study, we calculated the number of patients experiencing episodes of URTIs and stratified these patients by age and  
20 antibiotic treatment (no antibiotic treatment group and treated with antibiotics group). We then calculated the number of bacterial  
21 complications occurring in these patients and risk of bacterial complications per 10 000 patients.  
22  
23

24 Data management and analyses were carried out using SAS 9.4 (SAS Institute, Cary, NC).  
25  
26

## 27 28 **Results**

29  
30  
31 **The volumes of dispensed respiratory tract antibiotics in Stockholm County declined by 22% from 2006 to 2015**  
32 **(Figure 2). The number of acute otitis media and sinusitis episodes declined and the number of tonsillitis**  
33 **episodes was increasing from 2006 to 2012 and then sharply declined and remained stable from 2013 to 2015.**  
34  
35  
36 **(Tables**  
37  
38  
39  
40  
41  
42  
43  
44  
45

1  
2  
3 Table 1). The proportion of patients treated with antibiotics declined in the cohorts of acute otitis media (from 88% in 2006 to 81% in 2015),  
4 sinusitis (from 86% in 2006 to 71% in 2015) and sinusitis/acute URTI unspecified (from 36% in 2006 to 18% in 2015), and remained stable for  
5 tonsillitis (73% in 2006 and 73% in 2015).  
6  
7

8 In the ecological analyses we observed a significant decrease in the volumes of dispensed antibiotics from 2006 to 2015 ( $p < 0.0001$ ). During the  
9 same time period there was no significant trend in the number of the following bacterial complications: mastoiditis ( $p = 0.0933$ ), peritonsillitis  
10 ( $p = 0.0544$ ), invasive group A streptococcal disease ( $p = 0.3991$ ), orbital abscess ( $p = 0.9637$ ), extra- and subdural abscess ( $p = 0.4790$ ) and  
11 pansinusitis ( $p = 0.3971$ ). For meningitis and acute ethmoidal sinusitis, a decrease in the numbers of infections from 2006 to 2015 was observed  
12 ( $p = 0.0038$  and  $p = 0.0003$ , respectively) and for retropharyngeal and parapharyngeal abscess an increase was observed ( $p = 0.0214$ ). Data are  
13 presented in  
14  
15  
16  
17  
18  
19  
20  
21  
22  
23  
24  
25  
26  
27  
28  
29  
30  
31  
32  
33  
34  
35  
36  
37  
38  
39  
40  
41  
42  
43  
44  
45  
46  
47  
48  
49

Using individual patient level data we identified 515 156 acute otitis media, 866 378 tonsillitis, 269 215 sinusitis, and 2 015 595 sinusitis/acute upper respiratory tract infections of multiple and unspecified sites episodes (see Supplement 4 for cohort selection flow charts).

For peer review only

1  
2  
3  
4  
5  
6  
7  
8  
9  
10  
11  
12  
13  
14  
15  
16  
17  
18  
19  
20  
21  
22  
23  
24  
25  
26  
27  
28  
29  
30  
31  
32  
33  
34  
35  
36  
37  
38  
39  
40  
41  
42  
43  
44  
45  
46  
47  
48  
49  
50  
51  
52  
53  
54  
55  
56  
57  
58  
59  
60

Table 2 provides information on the number of bacterial complications, stratified by age and antibiotic treatment. Our data showed that all bacterial complications in URTI patients were infrequent (less than 1.5 per 10 000 episodes) with the exception of peritonsillitis after tonsillitis (risk per 10 000 tonsillitis episodes: 32.4 and 41.1 in patients with no antibiotic treatment and patients treated with antibiotics, respectively). Peritonsillitis was most common in adults aged 15 to 64 years old (risk per 10 000 tonsillitis patients aged 15 to 64: 42.2 and 67.4 in patients with no antibiotic treatment and patients treated with antibiotics, respectively).

## Discussion

The volumes of dispensed URTI antibiotics in Stockholm County decreased by 22% over a ten-year period from 2006 to 2015. Our ecological analyses covering the entire population in a large region showed that restricted use of antibiotics was not associated with an increase in bacterial complications of mastoiditis, meningitis, peritonsillar abscess, invasive group A streptococcal disease, acute pansinusitis, acute ethmoidal sinusitis, orbital abscess and extradural abscess and subdural abscess. Moreover, the number of meningitis and acute ethmoidal sinusitis complications decreased over the study period. For retropharyngeal and parapharyngeal abscess an increase was observed.

The analyses of individual level data revealed that the incidence of bacterial complications following primary URTIs was very low: the risk per 10 000 URTI episodes was less than 1.5 (average for all age groups) for all analyzed bacterial complications (with the exception of peritonsillitis) for both patients with no antibiotic treatment and patients treated with antibiotics. We observed a slightly higher risk of bacterial complications in the antibiotic treated group in 3 out of 9 bacterial complications studied. This can possibly be explained by the presence of selection bias: patients prescribed antibiotics likely had a more severe primary URTI thus were at a higher risk of both being prescribed an antibiotic and progressing to bacterial complications.

Our findings of no association between more restricted antibiotic use and the incidence of bacterial complications are in line with previous studies(10, 20-22). A previous Swedish study(23) showed that there were no increase in acute mastoiditis since 2000, when new guidelines recommending restrictive use of antibiotics for AOM were introduced. In 2010 new revised guidelines with an even more restrictive recommendation were issued (24). Our study includes data on mastoiditis in Stockholm County before and after these most restrictive recommendations, thus providing a first update on the impact of further restriction of antibiotic use in treatment of AOM.

Differences in definitions used can explain discrepancies with other observational studies (20, 25). Our definition of bacterial complication only included bacterial complications recorded in inpatient care and therefore was more strict than those used in other studies (for example in comparison to analyses by Petersen et al.). Furthermore, our definition of the antibiotic-exposed group included patients receiving an antibiotic anytime during their URTI episode (to account for the watchful waiting approach) thus likely resulting in a more complete capture of patients treated with antibiotics.

1  
2  
3 We also found that a large proportion of diagnosed bacterial complications analyzed in this study were  
4 not preceded by patients seeking care for URTIs. A short duration from the onset of primary URTI to  
5 progression to bacterial complication could be an explanation for this as patient would have already  
6 developed a bacterial complication by the time of the first contact with healthcare professionals. In  
7 children, for example, the onset of symptoms and signs of mastoiditis is often very quick (within 24  
8 hours). In this case a rapid progress of the disease is likely related to the virulence of pathogenic airway  
9 bacteria. It has also been noted that peritonsillitis, the most common bacterial complication among  
10 adults in our study, often occurs without a preceding typical tonsillitis(26). Alternate routes of infection,  
11 for example oral pathogenic bacteria, may play a role in etiology of peritonsillitis.  
12  
13  
14  
15

16 The decline in meningitis and acute ethmoidal sinusitis observed in our analyses is in line with previous  
17 studies demonstrating a similar decrease in these infections after the introduction of conjugated anti-  
18 pneumococcal vaccine in the general vaccine schedule in Stockholm in 2007(27).  
19  
20

21 All data used in our study are population-based and include complete information on diagnoses in  
22 primary, outpatient specialist and inpatient care as long as they were recorded by healthcare  
23 professionals, as well as on all dispensations of antibiotics in ambulatory care. These data are updated  
24 on a monthly basis thus enabling a real-time patient follow up. Using administrative data however  
25 carries a number of known limitations, including reliance on the accuracy and completeness of recorded  
26 diagnoses, lack of information on antibiotics administered in the inpatient setting and inability to assert  
27 whether the patient completed the prescribed course of antibiotic treatment.  
28  
29  
30

31 Our study demonstrated that routinely collected administrative healthcare data can be used in  
32 continuous monitoring of antibiotics use and related patient outcomes. We found that more restrictive  
33 use of antibiotics for common infections of the upper respiratory tract has not led to an increased  
34 number of severe bacterial complications. Our ongoing follow up model enables the provision of  
35 continuous feedback to patients, prescribers and policy makers and can be adapted for other Swedish  
36 counties with similar data sources or internationally.  
37  
38  
39  
40

### 41 **Contributorship statement**

42 TC, IE, AG, BW, JH, CN, AT contributed to the design of the study. TC extracted the data, wrote statistical  
43 programs and led statistical analyses. TC, IE, AG, BW, JH, CN, AT participated in the interpretation of  
44 data. TC had full access to all of the data in the study and can take responsibility for the integrity of the  
45 data and the accuracy of the data analysis. TC and IE drafted the paper. TC, IE, AG, BW, JH, CN, AT  
46 critically revised the paper for important intellectual content and approved the final version to be  
47 published.  
48  
49  
50  
51

### 52 **Competing interests**

53 All authors have completed the ICMJE uniform disclosure form at  
54 [http://www.icmje.org/coi\\_disclosure.pdf](http://www.icmje.org/coi_disclosure.pdf) and declare: no support from any organisation for the  
55 submitted work; no financial relationships with any organisations that might have an interest in the  
56  
57  
58  
59  
60

submitted work in the previous three years, no other relationships or activities that could appear to have influenced the submitted work.

## Funding

This study was funded the Stockholm County Council and The Public Health Agency of Sweden.

## Data sharing statement

Additional data are available by emailing the corresponding author.

## References

1. Bronzwaer SL, Cars O, Buchholz U, Molstad S, Goettsch W, Veldhuijzen IK, et al. A European study on the relationship between antimicrobial use and antimicrobial resistance. *Emerging infectious diseases*. 2002 Mar;8(3):278-82. PubMed PMID: 11927025. Pubmed Central PMCID: 2732471.
2. Goossens H, Ferech M, Vander Stichele R, Elseviers M, Group EP. Outpatient antibiotic use in Europe and association with resistance: a cross-national database study. *Lancet*. 2005 Feb 12-18;365(9459):579-87. PubMed PMID: 15708101.
3. Costelloe C, Metcalfe C, Lovering A, Mant D, Hay AD. Effect of antibiotic prescribing in primary care on antimicrobial resistance in individual patients: systematic review and meta-analysis. *Bmj*. 2010 May 18;340:c2096. PubMed PMID: 20483949.
4. Kaplan W, Wirtz VJ, Mantel-Teeuwisse A, Stolk P, Duthey B, Laing R. *Priority Medicines for Europe and the World 2013 Update*. Geneva: World Health Organization in collaboration with Utrecht University and Boston University, 2013.
5. Adriaenssens N, Coenen S, Versporten A, Muller A, Minalu G, Faes C, et al. European Surveillance of Antimicrobial Consumption (ESAC): outpatient antibiotic use in Europe (1997-2009). *The Journal of antimicrobial chemotherapy*. 2011 Dec;66 Suppl 6:vi3-12. PubMed PMID: 22096064.
6. Van Boeckel TP, Gandra S, Ashok A, Caudron Q, Grenfell BT, Levin SA, et al. Global antibiotic consumption 2000 to 2010: an analysis of national pharmaceutical sales data. *The Lancet Infectious diseases*. 2014 Aug;14(8):742-50. PubMed PMID: 25022435.
7. Molstad S, Erntell M, Hanberger H, Melander E, Norman C, Skoog G, et al. Sustained reduction of antibiotic use and low bacterial resistance: 10-year follow-up of the Swedish Strama programme. *The Lancet Infectious diseases*. 2008 Feb;8(2):125-32. PubMed PMID: 18222163.
8. Andre M, Vernby A, Odenholt I, Lundborg CS, Axelsson I, Eriksson M, et al. Diagnosis-prescribing surveys in 2000, 2002 and 2005 in Swedish general practice: consultations, diagnosis, diagnostics and treatment choices. *Scandinavian journal of infectious diseases*. 2008;40(8):648-54. PubMed PMID: 18979603.
9. Public Health Agency of Sweden. *A report on Swedish Antibiotic Utilisation and Resistance in Human Medicine. SWEDRES 2013*. 2013.
10. Keith T, Saxena S, Murray J, Sharland M. Risk-benefit analysis of restricting antimicrobial prescribing in children: what do we really know? *Current opinion in infectious diseases*. 2010 Jun;23(3):242-8. PubMed PMID: 20375892.



11. Gunnarsson MS, Sundvall PD, Gunnarsson R. In primary health care, never prescribe antibiotics to patients suspected of having an uncomplicated sore throat caused by group A beta-haemolytic streptococci without first confirming the presence of this bacterium. *Scandinavian journal of infectious diseases*. 2012 Dec;44(12):915-21. PubMed PMID: 22830425.
12. Centor RM. Antibiotics for sore throat patients--varied opinions. *Scandinavian journal of infectious diseases*. 2013 Mar;45(3):176-8. PubMed PMID: 22992210.
13. Stromberg A, Roos K, Hagberg L. [Scrap the Centor criteria in tonsillitis]. *Lakartidningen*. 2015 Oct 12;112. PubMed PMID: 26461512. Skrota Centorkriterierna vid halsfluss.
14. Lucas PJ, Cabral C, Hay AD, Horwood J. A systematic review of parent and clinician views and perceptions that influence prescribing decisions in relation to acute childhood infections in primary care. *Scandinavian journal of primary health care*. 2015 Mar;33(1):11-20. PubMed PMID: 25716427. Pubmed Central PMCID: 4377734.
15. Kumar S, Little P, Britten N. Why do general practitioners prescribe antibiotics for sore throat? Grounded theory interview study. *Bmj*. 2003 Jan 18;326(7381):138. PubMed PMID: 12531847. Pubmed Central PMCID: 140007.
16. Wandell P, Carlsson AC, Wettermark B, Lord G, Cars T, Ljunggren G. Most common diseases diagnosed in primary care in Stockholm, Sweden, in 2011. *Family practice*. 2013 Oct;30(5):506-13. PubMed PMID: 23825186.
17. Wettermark B, Hammar N, Fored CM, Leimanis A, Otterblad Olausson P, Bergman U, et al. The new Swedish Prescribed Drug Register--opportunities for pharmacoepidemiological research and experience from the first six months. *Pharmacoepidemiology and drug safety*. 2007 Jul;16(7):726-35. PubMed PMID: 16897791.
18. Coenen S, Ferech M, Haaijer-Ruskamp FM, Butler CC, Vander Stichele RH, Verheij TJ, et al. European Surveillance of Antimicrobial Consumption (ESAC): quality indicators for outpatient antibiotic use in Europe. *Quality & safety in health care*. 2007 Dec;16(6):440-5. PubMed PMID: 18055888. Pubmed Central PMCID: 2653179.
19. Schollin Ask L, Hultman Dennison S, Stjärne P, Granath A, Srivastava S, Eriksson M, et al. Orbital complications in preschool children with rhinosinusitis in tertiary care - a population based study.
20. Petersen I, Johnson AM, Islam A, Duckworth G, Livermore DM, Hayward AC. Protective effect of antibiotics against serious complications of common respiratory tract infections: retrospective cohort study with the UK General Practice Research Database. *Bmj*. 2007 Nov 10;335(7627):982. PubMed PMID: 17947744. Pubmed Central PMCID: 2072032.
21. Sharland M, Kendall H, Yeates D, Randall A, Hughes G, Glasziou P, et al. Antibiotic prescribing in general practice and hospital admissions for peritonsillar abscess, mastoiditis, and rheumatic fever in children: time trend analysis. *Bmj*. 2005 Aug 6;331(7512):328-9. PubMed PMID: 15967760. Pubmed Central PMCID: 1183132.
22. Hansen FS, Hoffmans R, Georgalas C, Fokkens WJ. Complications of acute rhinosinusitis in The Netherlands. *Family practice*. 2012 Apr;29(2):147-53. PubMed PMID: 21896505.
23. Groth A, Enoksson F, Hermansson A, Hultcrantz M, Stalfors J, Stenfeldt K. Acute mastoiditis in children in Sweden 1993-2007--no increase after new guidelines. *International journal of pediatric otorhinolaryngology*. 2011 Dec;75(12):1496-501. PubMed PMID: 21945244.
24. Medical Products Agency. Behandlingsrekommendation-otit (In Swedish). Available at: <https://lakemedelsverket/malgrupp/Halso---sjukvard/Behandlings--rekommendationer/Behandlingsrekommendation---listan/Otit-akut-mediaotit---AOM/> Accessed 31 October 2016. 2010.
25. Gulliford MC, Moore MV, Little P, Hay AD, Fox R, Prevost AT, et al. Safety of reduced antibiotic prescribing for self limiting respiratory tract infections in primary care: cohort study using

1  
2  
3  
4  
5  
6  
7  
8  
9  
10  
11  
12  
13  
14  
15  
16  
17  
18  
19  
20  
21  
22  
23  
24  
25  
26  
27  
28  
29  
30  
31  
32  
33  
34  
35  
36  
37  
38  
39  
40  
41  
42  
43  
44  
45  
46  
47  
48  
49  
50  
51  
52  
53  
54  
55  
56  
57  
58  
59  
60

electronic health records. *Bmj*. 2016 Jul 04;354:i3410. PubMed PMID: 27378578. Pubmed Central PMCID: 4933936.

26. Marom T, Cinamon U, Itskoviz D, Roth Y. Changing trends of peritonsillar abscess. *American journal of otolaryngology*. 2010 May-Jun;31(3):162-7. PubMed PMID: 20015734.

27. Lindstrand A, Bennet R, Galanis I, Blennow M, Ask LS, Dennison SH, et al. Sinusitis and pneumonia hospitalization after introduction of pneumococcal conjugate vaccine. *Pediatrics*. 2014 Dec;134(6):e1528-36. PubMed PMID: 25384486.

For peer review only

## Tables

**Table 1. Number of episodes and antibiotic treatment for acute otitis media (cohort 1), tonsillitis (cohort 2), sinusitis (cohort 3) and sinusitis/acute upper respiratory tract infections of multiple and unspecified sites in combination (cohort 4) in Stockholm County from 2006 to 2015**

|                  | Acute otitis media      |                          | Tonsillitis             |                          | Sinusitis               |                          | Sinusitis/acute URTI unspecified |                          |
|------------------|-------------------------|--------------------------|-------------------------|--------------------------|-------------------------|--------------------------|----------------------------------|--------------------------|
|                  | No antibiotic treatment | Treated with antibiotics | No antibiotic treatment | Treated with antibiotics | No antibiotic treatment | Treated with antibiotics | No antibiotic treatment          | Treated with antibiotics |
|                  | n, %                    | n, %                     | n, %                    | n, %                     | n, %                    | n, %                     | n, %                             | n, %                     |
| 2006             | 6 414(12)               | 47 657(88)               | 20 496(27)              | 54 998(73)               | 3 744(14)               | 23 586(86)               | 108 735(64)                      | 61 658(36)               |
| 2007             | 6 971(12)               | 53 050(88)               | 23 262(26)              | 66 098(74)               | 4 364(14)               | 26 703(86)               | 123 484(64)                      | 68 564(36)               |
| 2008             | 8 374(13)               | 55 350(87)               | 25 857(27)              | 71 041(73)               | 5 065(17)               | 25 057(83)               | 138 906(69)                      | 62 195(31)               |
| 2009             | 8 260(15)               | 47 543(85)               | 27 007(29)              | 67 040(71)               | 5 942(22)               | 21 440(78)               | 149 417(74)                      | 51 323(26)               |
| 2010             | 10 266(18)              | 47 248(82)               | 27 024(28)              | 68 774(72)               | 7 361(26)               | 20 737(74)               | 160 610(76)                      | 52 044(24)               |
| 2011             | 8 773(18)               | 41 111(82)               | 23 635(25)              | 70 060(75)               | 7 531(28)               | 19 497(72)               | 167 915(77)                      | 50 351(23)               |
| 2012             | 9 464(19)               | 39 697(81)               | 24 299(24)              | 78 428(76)               | 8 377(30)               | 19 988(70)               | 172 164(78)                      | 49 398(22)               |
| 2013             | 7 933(19)               | 33 613(81)               | 20 069(27)              | 54 321(73)               | 7 150(29)               | 17 245(71)               | 160 925(80)                      | 39 023(20)               |
| 2014             | 8 271(19)               | 35 656(81)               | 20 794(28)              | 53 111(72)               | 6 453(28)               | 16 376(72)               | 161 070(81)                      | 38 395(19)               |
| 2015             | 7 858(19)               | 34 437(81)               | 19 956(27)              | 53 786(73)               | 6 949(29)               | 16 771(71)               | 172 759(82)                      | 38 556(18)               |
| <b>2006-2015</b> | <b>82 584(16)</b>       | <b>435 362(84)</b>       | <b>232 399(27)</b>      | <b>637 657(73)</b>       | <b>62 936(23)</b>       | <b>207 400(77)</b>       | <b>1 515 985(75)</b>             | <b>511 507(25)</b>       |

Table 2. Risk of bacterial complications in the month after diagnosis of upper respiratory tract infections

|                                                                             | No antibiotic treatment |                     |                | Treated with antibiotics |                     |                |
|-----------------------------------------------------------------------------|-------------------------|---------------------|----------------|--------------------------|---------------------|----------------|
|                                                                             | No of patients          | No of complications | Risk per 10000 | No of patients           | No of complications | Risk per 10000 |
| <b>Mastoiditis after acute otitis media</b>                                 |                         |                     |                |                          |                     |                |
| <b>0-4</b>                                                                  | 45 473                  | 6                   | 1.32           | 243 141                  | 23                  | 0.95           |
| <b>5-14</b>                                                                 | 21 294                  | 3                   | 1.41           | 88 741                   | 13                  | 1.46           |
| <b>15-64</b>                                                                | 12 676                  | 1                   | 0.79           | 93 582                   | 9                   | 0.96           |
| <b>65+</b>                                                                  | 2 412                   | 0                   | -              | 7 809                    | 1                   | 1.28           |
| <b>Total<sup>1</sup></b>                                                    | <b>81 864</b>           | <b>10</b>           | <b>1.22</b>    | <b>433 273</b>           | <b>46</b>           | <b>1.06</b>    |
| <b>Meningitis after acute otitis media</b>                                  |                         |                     |                |                          |                     |                |
| <b>0-4</b>                                                                  | 45 476                  | 2                   | 0.44           | 243 151                  | 1                   | 0.04           |
| <b>5-14</b>                                                                 | 21 292                  | 1                   | 0.47           | 88 746                   | 0                   | -              |
| <b>15-64</b>                                                                | 12 676                  | 1                   | 0.79           | 93 581                   | 13                  | 1.39           |
| <b>65+</b>                                                                  | 2 412                   | 0                   | -              | 7 808                    | 4                   | 5.13           |
| <b>Total<sup>1</sup></b>                                                    | <b>81 865</b>           | <b>4</b>            | <b>0.49</b>    | <b>433 286</b>           | <b>18</b>           | <b>0.42</b>    |
| <b>Peritonsillitis after pharyngotonsillitis</b>                            |                         |                     |                |                          |                     |                |
| <b>0-4</b>                                                                  | 20 772                  | 4                   | 1.93           | 116 785                  | 15                  | 1.28           |
| <b>5-14</b>                                                                 | 44 609                  | 57                  | 12.8           | 156 170                  | 183                 | 11.7           |
| <b>15-64</b>                                                                | 157 178                 | 663                 | 42.2           | 347 424                  | 2 340               | 67.4           |
| <b>65+</b>                                                                  | 9 167                   | 27                  | 29.5           | 12 552                   | 61                  | 48.6           |
| <b>Total<sup>2</sup></b>                                                    | <b>231 749</b>          | <b>751</b>          | <b>32.4</b>    | <b>632 933</b>           | <b>2 599</b>        | <b>41.1</b>    |
| <b>Retropharyngeal and parapharyngeal abscess after pharyngotonsillitis</b> |                         |                     |                |                          |                     |                |
| <b>0-4</b>                                                                  | 20 772                  | 0                   | -              | 116 811                  | 2                   | 0.17           |
| <b>5-14</b>                                                                 | 44 585                  | 0                   | -              | 156 332                  | 3                   | 0.19           |
| <b>15-64</b>                                                                | 156 805                 | 24                  | 1.53           | 349 240                  | 76                  | 2.18           |
| <b>65+</b>                                                                  | 9 154                   | 4                   | 4.37           | 12 627                   | 9                   | 7.13           |
| <b>Total<sup>2</sup></b>                                                    | <b>231 339</b>          | <b>28</b>           | <b>1.21</b>    | <b>635 012</b>           | <b>90</b>           | <b>1.42</b>    |
| <b>Invasive group A streptococcal disease after pharyngotonsillitis</b>     |                         |                     |                |                          |                     |                |
| <b>0-4</b>                                                                  | 20 772                  | 0                   | -              | 116 811                  | 0                   | -              |
| <b>5-14</b>                                                                 | 44 585                  | 0                   | -              | 156 333                  | 2                   | 0.13           |
| <b>15-64</b>                                                                | 156 806                 | 4                   | 0.26           | 349 255                  | 8                   | 0.23           |
| <b>65+</b>                                                                  | 9 155                   | 3                   | 3.28           | 12 632                   | 1                   | 0.79           |
| <b>Total<sup>2</sup></b>                                                    | <b>231 341</b>          | <b>7</b>            | <b>0.30</b>    | <b>635 033</b>           | <b>11</b>           | <b>0.17</b>    |
| <b>Orbital abscess after sinusitis</b>                                      |                         |                     |                |                          |                     |                |
| <b>0-4</b>                                                                  | 199                     | 0                   | -              | 679                      | 0                   | -              |
| <b>5-14</b>                                                                 | 1 791                   | 1                   | 5.58           | 4 333                    | 0                   | -              |
| <b>15-64</b>                                                                | 54 811                  | 0                   | -              | 181 930                  | 1                   | 0.05           |
| <b>65+</b>                                                                  | 5 637                   | 0                   | -              | 19 832                   | 0                   | -              |
| <b>Total<sup>3</sup></b>                                                    | <b>62 441</b>           | <b>1</b>            | <b>0.16</b>    | <b>206 774</b>           | <b>1</b>            | <b>0.05</b>    |

|                                                                                                                               | No antibiotic treatment |                     |                | Treated with antibiotics |                     |                |
|-------------------------------------------------------------------------------------------------------------------------------|-------------------------|---------------------|----------------|--------------------------|---------------------|----------------|
|                                                                                                                               | No of patients          | No of complications | Risk per 10000 | No of patients           | No of complications | Risk per 10000 |
| <b>Extra- and subdural abscess after sinusitis</b>                                                                            |                         |                     |                |                          |                     |                |
| <b>0-4</b>                                                                                                                    | 199                     | 0                   | -              | 679                      | 0                   | -              |
| <b>5-14</b>                                                                                                                   | 1 791                   | 0                   | -              | 4 333                    | 1                   | 2.31           |
| <b>15-64</b>                                                                                                                  | 54 811                  | 1                   | 0.18           | 181 930                  | 1                   | 0.05           |
| <b>65+</b>                                                                                                                    | 5 637                   | 0                   | -              | 19 832                   | 0                   | -              |
| <b>Total<sup>3</sup></b>                                                                                                      | <b>62 441</b>           | <b>1</b>            | <b>0.16</b>    | <b>206 774</b>           | <b>2</b>            | <b>0.10</b>    |
| <b>Acute pansinusitis after sinusitis</b>                                                                                     |                         |                     |                |                          |                     |                |
| <b>0-4</b>                                                                                                                    | 198                     | 0                   | -              | 679                      | 0                   | -              |
| <b>5-14</b>                                                                                                                   | 1 790                   | 0                   | -              | 4 330                    | 1                   | 2.31           |
| <b>15-64</b>                                                                                                                  | 54 812                  | 7                   | 1.28           | 181 923                  | 15                  | 0.82           |
| <b>65+</b>                                                                                                                    | 5 637                   | 0                   | -              | 19 832                   | 2                   | 1.01           |
| <b>Total<sup>3</sup></b>                                                                                                      | <b>62 440</b>           | <b>7</b>            | <b>1.12</b>    | <b>206 764</b>           | <b>18</b>           | <b>0.87</b>    |
| <b>Acute ethmoidal sinusitis after sinusitis / acute upper respiratory tract infections of multiple and unspecified sites</b> |                         |                     |                |                          |                     |                |
| <b>0-4</b>                                                                                                                    | 419 540                 | 39                  | 0.93           | 70 887                   | 15                  | 2.12           |
| <b>5-14</b>                                                                                                                   | 208 157                 | 21                  | 1.01           | 34 173                   | 13                  | 3.80           |
| <b>15-64</b>                                                                                                                  | 778 900                 | 4                   | 0.05           | 347 041                  | 6                   | 0.17           |
| <b>65+</b>                                                                                                                    | 100 201                 | 1                   | 0.10           | 56 669                   | 0                   | -              |
| <b>Total<sup>4</sup></b>                                                                                                      | <b>1 506 825</b>        | <b>65</b>           | <b>0.43</b>    | <b>508 770</b>           | <b>34</b>           | <b>0.67</b>    |

1. Missing information on age for 9 episodes of acute otitis media

2. Missing information on age for 25 episodes of tonsillitis

3. Missing information on age for 3 episodes of sinusitis

4. Missing information on age for 27 episodes of sinusitis

## Figure legends

Figure 1. Definition of an episode of upper respiratory tract infection (here exemplified with acute otitis media (AOM) and mastoiditis)

Figure 2. Trend for respiratory tract antibiotic utilization in Stockholm County from 2006 to 2015

Figure 3. Trend for bacterial complications in Stockholm County from 2006 to 2015.

For peer review only

1  
2  
3  
4  
5  
6  
7  
8  
9  
10  
11  
12  
13  
14  
15  
16  
17  
18  
19  
20  
21  
22  
23  
24  
25  
26  
27  
28  
29  
30  
31  
32  
33  
34  
35  
36  
37  
38  
39  
40  
41  
42  
43  
44  
45  
46  
47

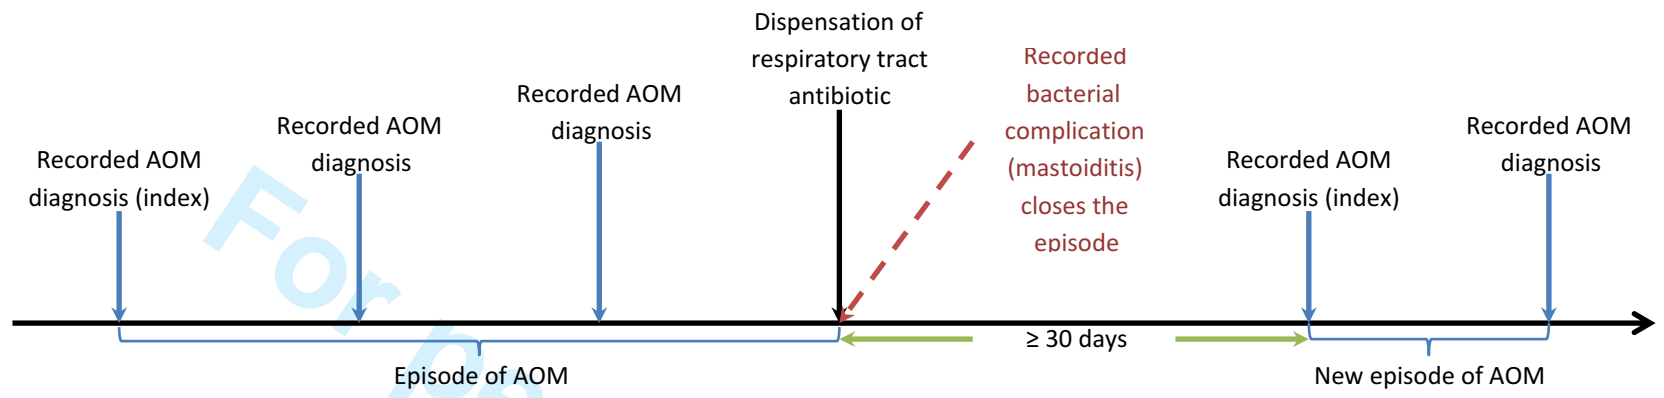

For peer review only

1  
2  
3  
4  
5  
6  
7  
8  
9  
10  
11  
12  
13  
14  
15  
16  
17  
18  
19  
20  
21  
22  
23  
24  
25  
26  
27  
28  
29  
30  
31  
32  
33  
34  
35  
36  
37  
38  
39  
40  
41  
42  
43  
44  
45  
46  
47



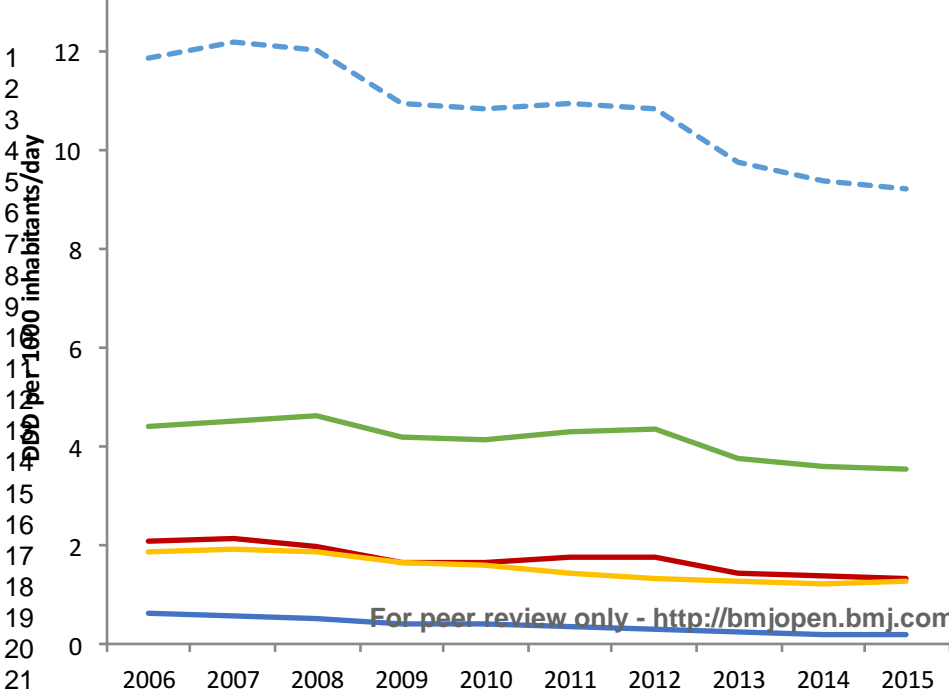

- Respiratory tract antibiotics (total)
- Phenoxyethylpenicillin
- Doxycycline
- Amoxicillin
- Erythromycin and cephalosporins

For peer review only - <http://bmjopen.bmj.com/site/about/guidelines.xhtml>

BMJ Open

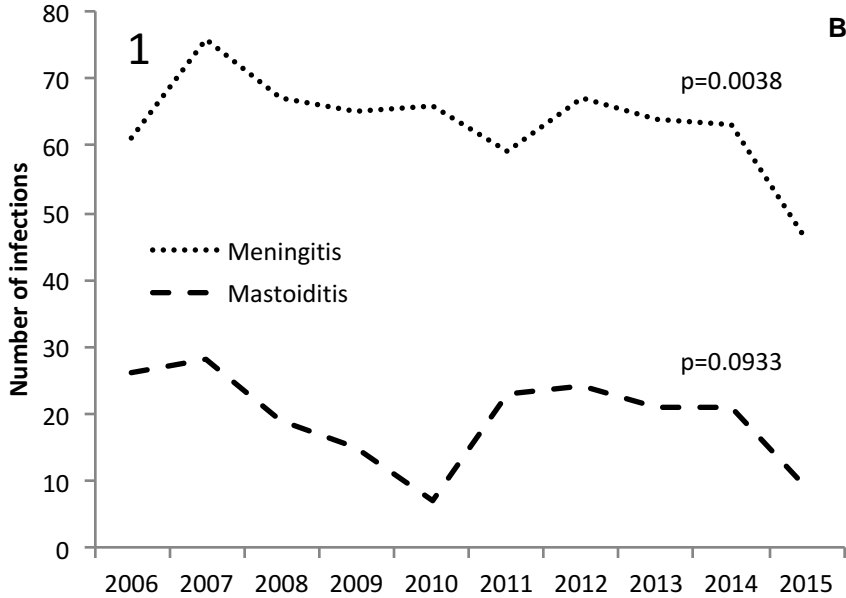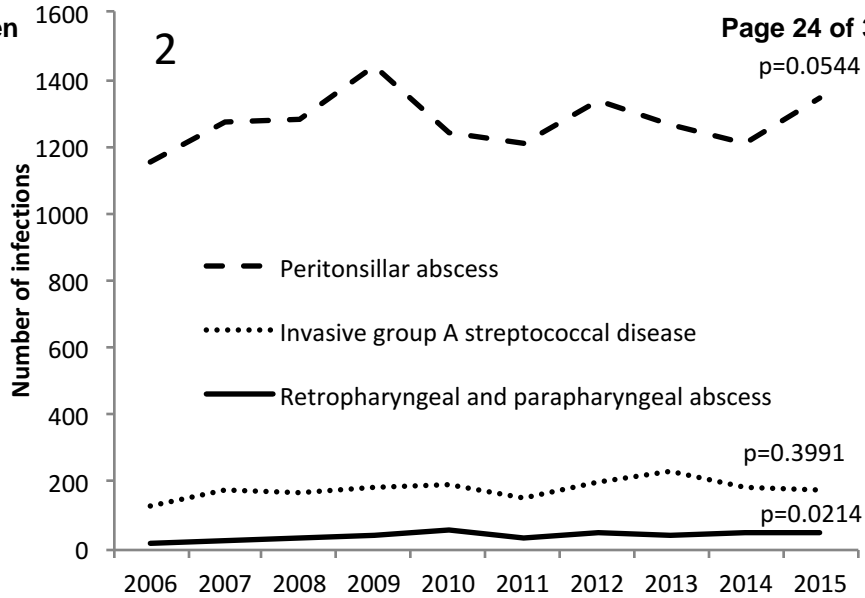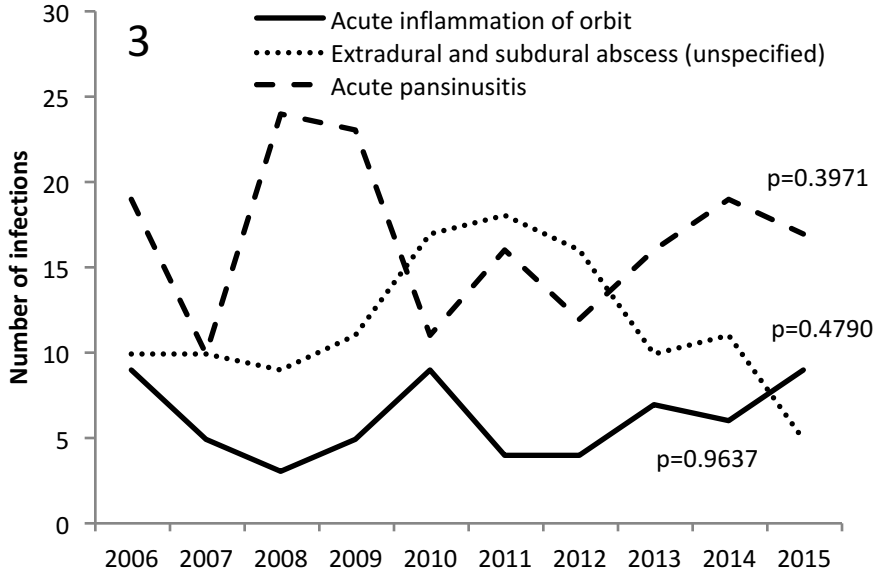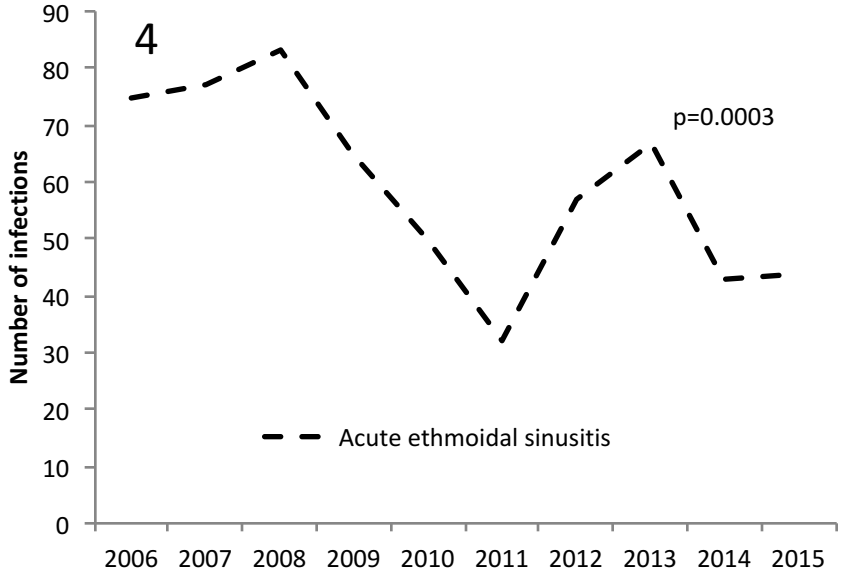

Figure 3 presents trends for bacterial complications, Stockholm County, from 2006 to 2015. The guidelines (1-4) corresponds to the complications we also assess in the four cohorts of the prospective cohort study ((1) acute otitis media cohort, (2) tonsillitis cohort, (3) sinusitis cohort and (4) sinusitis and acute upper respiratory tract infections of multiple and unspecified sites cohort. P-values present test for trend.

## Supplements

### Supplement 1. Antibiotics used to treat upper respiratory tract infections

| ATC code | Name of substance                 | ATC code | Name of substance                                   |
|----------|-----------------------------------|----------|-----------------------------------------------------|
| J01AA01  | demeclocycline                    | J01DD01  | cefotaxime                                          |
| J01AA02  | doxycycline                       | J01DD04  | ceftriaxone                                         |
| J01AA04  | lymecycline                       | J01DD08  | cefixime                                            |
| J01AA06  | oxytetracycline                   | J01DD13  | cefepodoxime                                        |
| J01AA07  | tetracycline                      | J01DD54  | ceftriaxone, combinations                           |
| J01AA08  | minocycline                       | J01DE01  | cefepime                                            |
| J01AA12  | tigecycline                       | J01DE02  | cefpirome                                           |
| J01BA01  | chloramphenicol                   | J01DH02  | meropenem                                           |
| J01CA01  | ampicillin                        | J01DH03  | ertapenem                                           |
| J01CA02  | pivampicillin                     | J01DH04  | doripenem                                           |
| J01CA04  | amoxicillin                       | J01DH51  | imipenem and enzyme inhibitor                       |
| J01CA06  | bacampicillin                     | J01DI02  | ceftaroline fosamil                                 |
| J01CA12  | piperacillin                      | J01EE01  | sulfamethoxazole and trimethoprim                   |
| J01CE01  | benzylpenicillin                  | J01FA01  | erythromycin                                        |
| J01CE02  | phenoxymethylpenicillin           | J01FA06  | roxithromycin                                       |
| J01CE08  | benzathine benzylpenicillin       | J01FA09  | clarithromycin                                      |
| J01CR02  | amoxicillin and enzyme inhibitor  | J01FA10  | azithromycin                                        |
| J01CR05  | piperacillin and enzyme inhibitor | J01FA15  | telithromycin                                       |
| J01CR50  | combinations of penicillins       | J01FF01  | clindamycin                                         |
| J01DA10  | cefotaxime                        | J01FF02  | lincomycin                                          |
| J01DB01  | cefalexin                         | J01FG01  | pristinamycin                                       |
| J01DB03  | cefalotin                         | J01FG02  | quinupristin/dalfopristin                           |
| J01DB04  | cefazolin                         | J01MA02  | ciprofloxacin                                       |
| J01DB05  | cefadroxil                        | J01MA12  | levofloxacin                                        |
| J01DC01  | cefoxitin                         | J01MA14  | moxifloxacin                                        |
| J01DC02  | cefuroxime                        | J01RA01  | penicillins, combinations with other antibacterials |
| J01DC04  | cefaclor                          | J01XA01  | vancomycin                                          |
| J01DC06  | cefonicid                         | J01XA02  | teicoplanin                                         |
| J01DC08  | loracarbef                        | J01XX08  | linezolid                                           |
|          |                                   | J01XX09  | daptomycin                                          |

## Supplement 2. ICD-10 codes used to identify bacterial complications

| Bacterial complication                            | ICD-10 code | ICD-10 text                                  |
|---------------------------------------------------|-------------|----------------------------------------------|
| <b>Mastoiditis</b>                                | H70.0       | Acute mastoiditis                            |
|                                                   | H70.2       | Petrositis                                   |
|                                                   | H70.9       | Mastoiditis, unspecified                     |
| <b>Meningitis</b>                                 | G00.0       | Haemophilus meningitis                       |
|                                                   | G00.1       | Pneumococcal meningitis                      |
|                                                   | G00.2       | Streptococcal meningitis                     |
|                                                   | G00.3       | Staphylococcal meningitis                    |
|                                                   | G00.9       | Bacterial meningitis, unspecified            |
| <b>Peritonsillar abscess</b>                      | J36         | Peritonsillar abscess                        |
| <b>Retropharyngeal and parapharyngeal abscess</b> | J39.0       | Retropharyngeal and parapharyngeal abscess   |
| <b>Invasive group A streptococcal disease</b>     | A40.0       | Sepsis due to streptococcus, group A         |
|                                                   | A40.9       | Streptococcal sepsis, unspecified            |
|                                                   | M72.6       | Necrotizing fasciitis                        |
| <b>Pansinusitis</b>                               | J01.4       | Acute pansinusitis                           |
| <b>Orbital abscess</b>                            | H05.0       | Acute inflammation of orbit                  |
| <b>Extra- and subdural abscess</b>                | G06.2       | Extradural and subdural abscess, unspecified |
| <b>Acute ethmoidal sinusitis</b>                  | J01.2       | Acute ethmoidal sinusitis                    |

## Supplement 3. ICD-10 codes used to identify primary URTIs

| Primary URTIs                                                                                   | ICD-10 code                                                                                          | ICD-10 text                                     |
|-------------------------------------------------------------------------------------------------|------------------------------------------------------------------------------------------------------|-------------------------------------------------|
| <b>Acute otitis media</b>                                                                       | H66.0                                                                                                | Acute suppurative otitis media                  |
|                                                                                                 | H66.9                                                                                                | Otitis media, unspecified                       |
| <b>Tonsillitis</b>                                                                              | J02                                                                                                  | Acute pharyngitis                               |
|                                                                                                 | J03                                                                                                  | Acute tonsillitis                               |
| <b>Sinusitis</b>                                                                                | J01.0                                                                                                | Acute maxillary sinusitis                       |
|                                                                                                 | J01.9                                                                                                | Acute sinusitis, unspecified                    |
|                                                                                                 | J01                                                                                                  | Acute sinusitis (for primary care records only) |
| <b>Sinusitis and acute upper respiratory tract infections of multiple and unspecified sites</b> | J01.0                                                                                                | Acute maxillary sinusitis                       |
|                                                                                                 | J01.9                                                                                                | Acute sinusitis, unspecified                    |
|                                                                                                 | J01                                                                                                  | Acute sinusitis (for primary care records only) |
|                                                                                                 | J06.0                                                                                                | Acute laryngopharyngitis                        |
|                                                                                                 | J06.9                                                                                                | Acute upper respiratory infection, unspecified  |
| J06                                                                                             | Acute upper respiratory infections of multiple and unspecified sites (for primary care records only) |                                                 |

Supplement 4. Cohort selection flow-chart

1. Acute otitis media (AOM) cohort

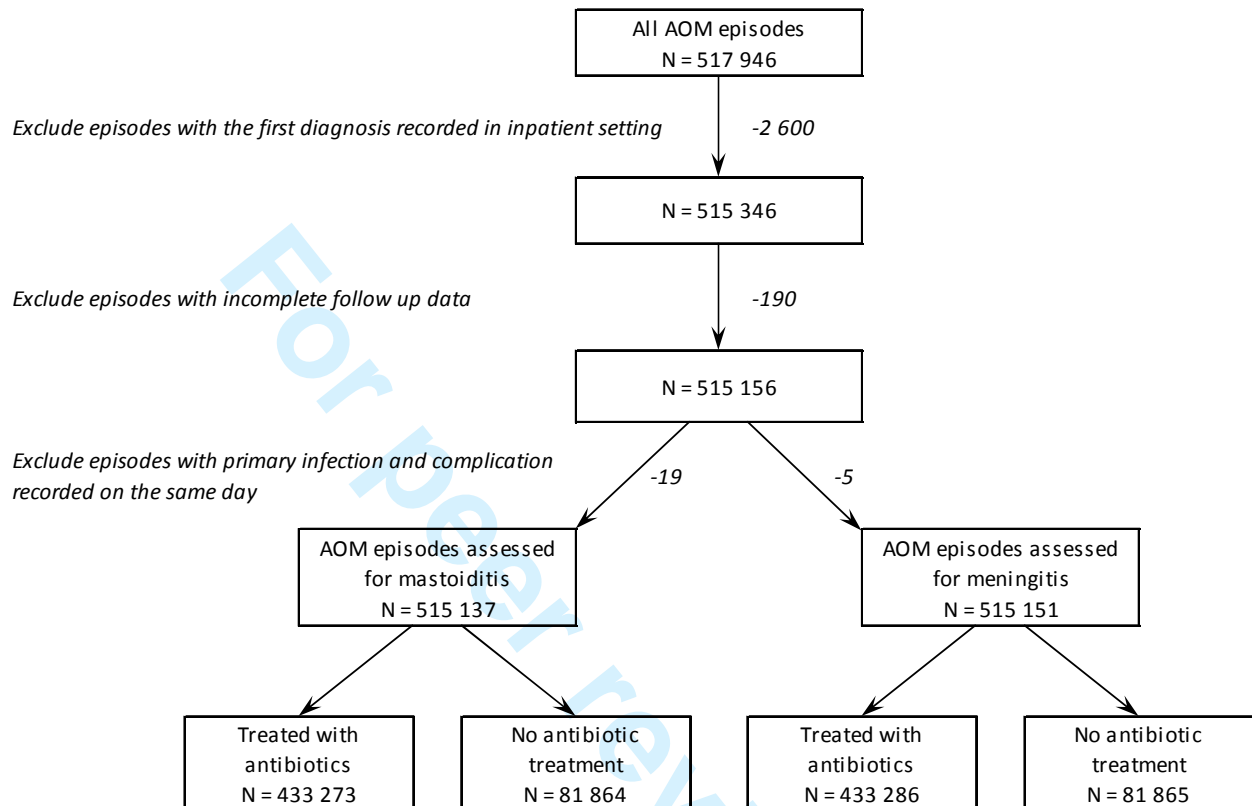

2. Tonsillitis cohort

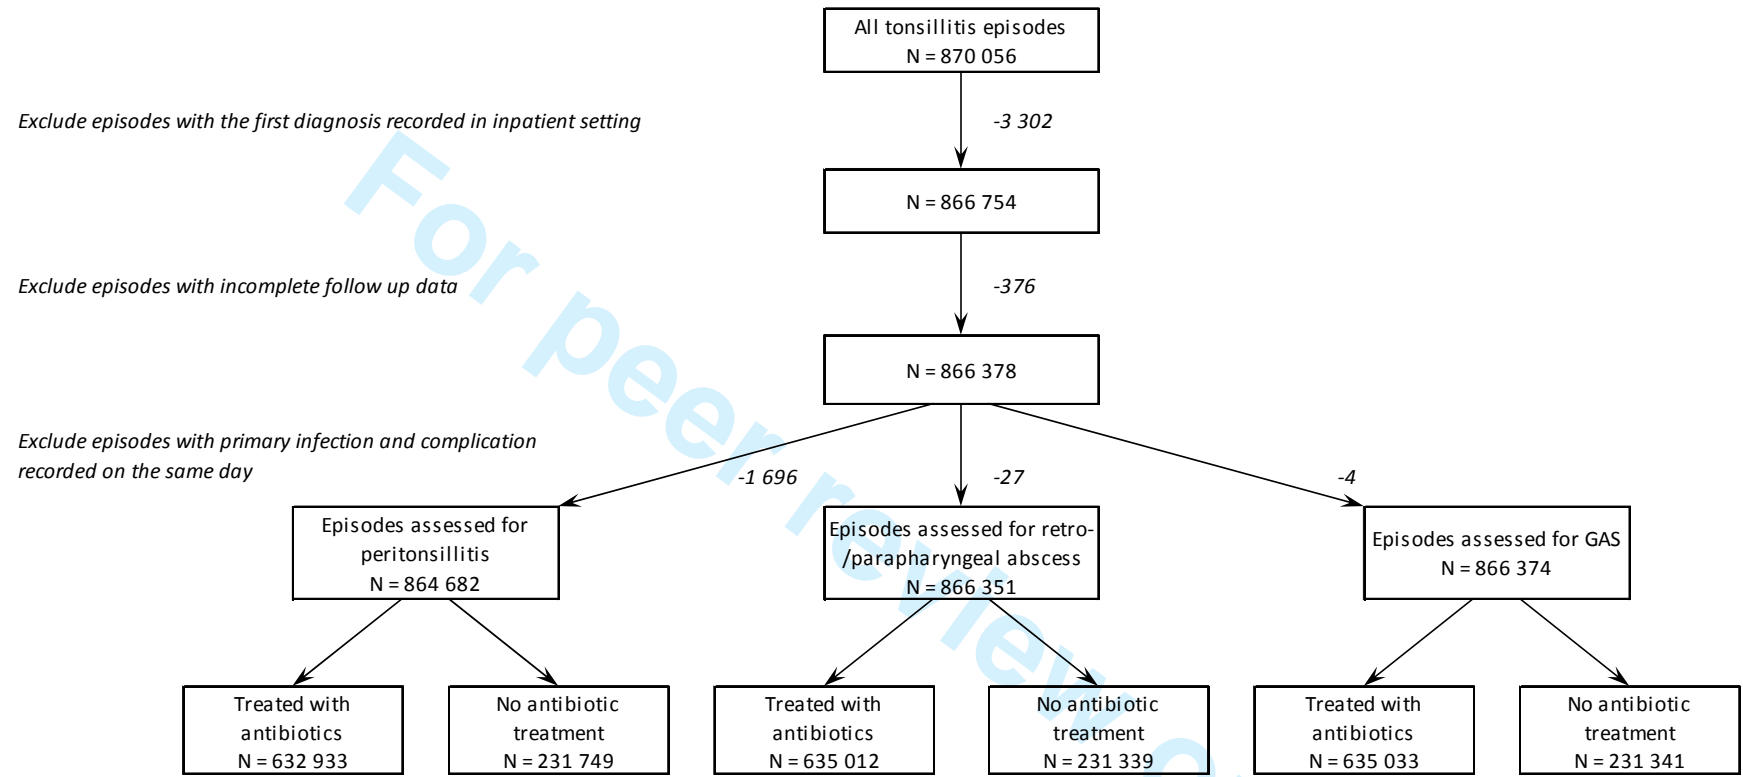

3. Acute sinusitis cohort

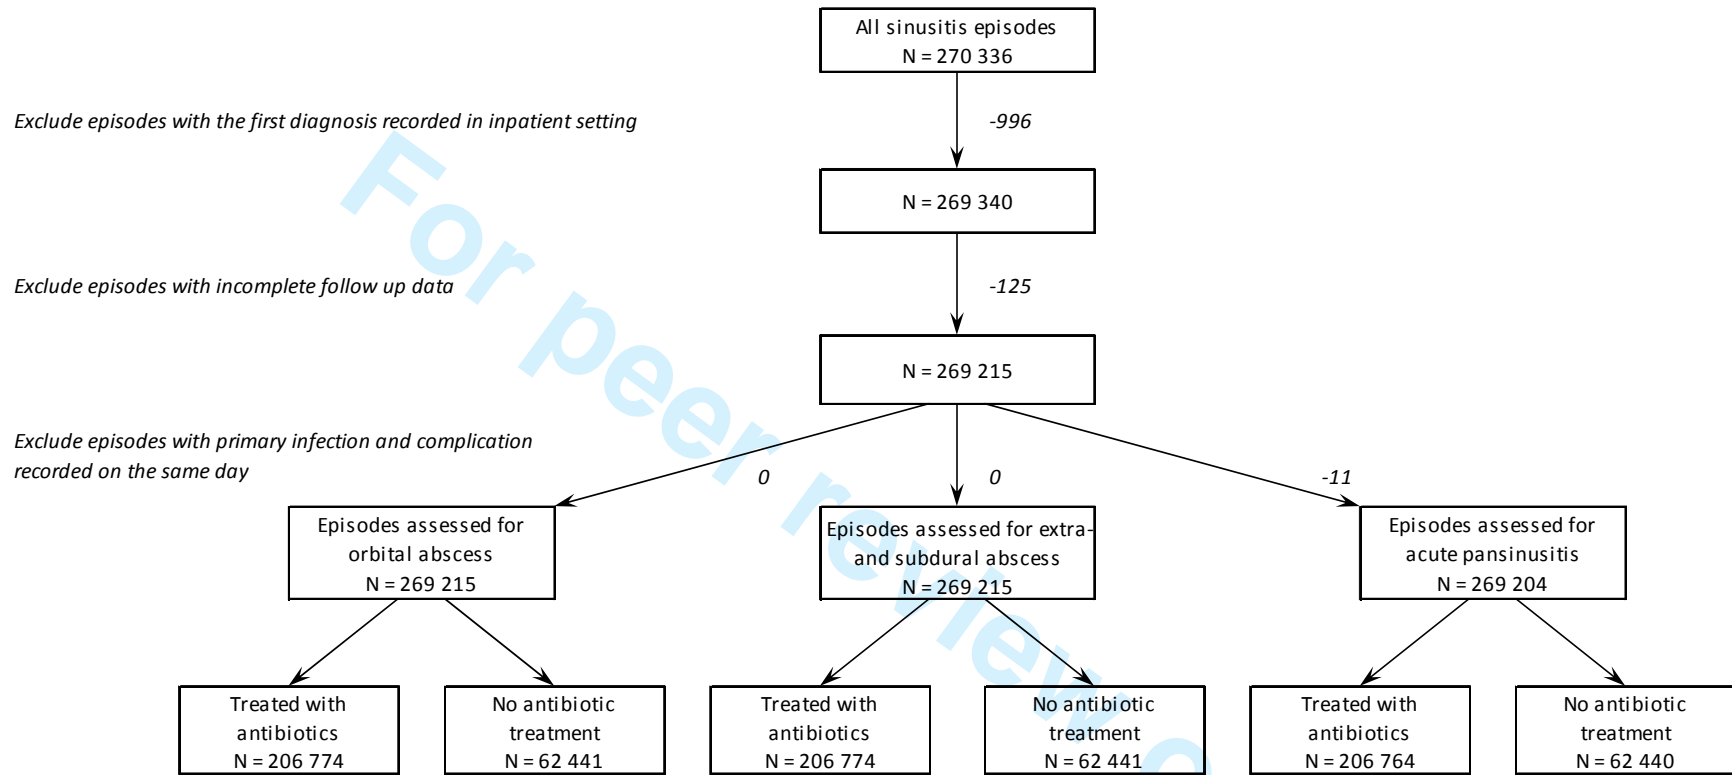



4. Acute sinusitis / acute upper respiratory tract infections of multiple and unspecified sites cohort

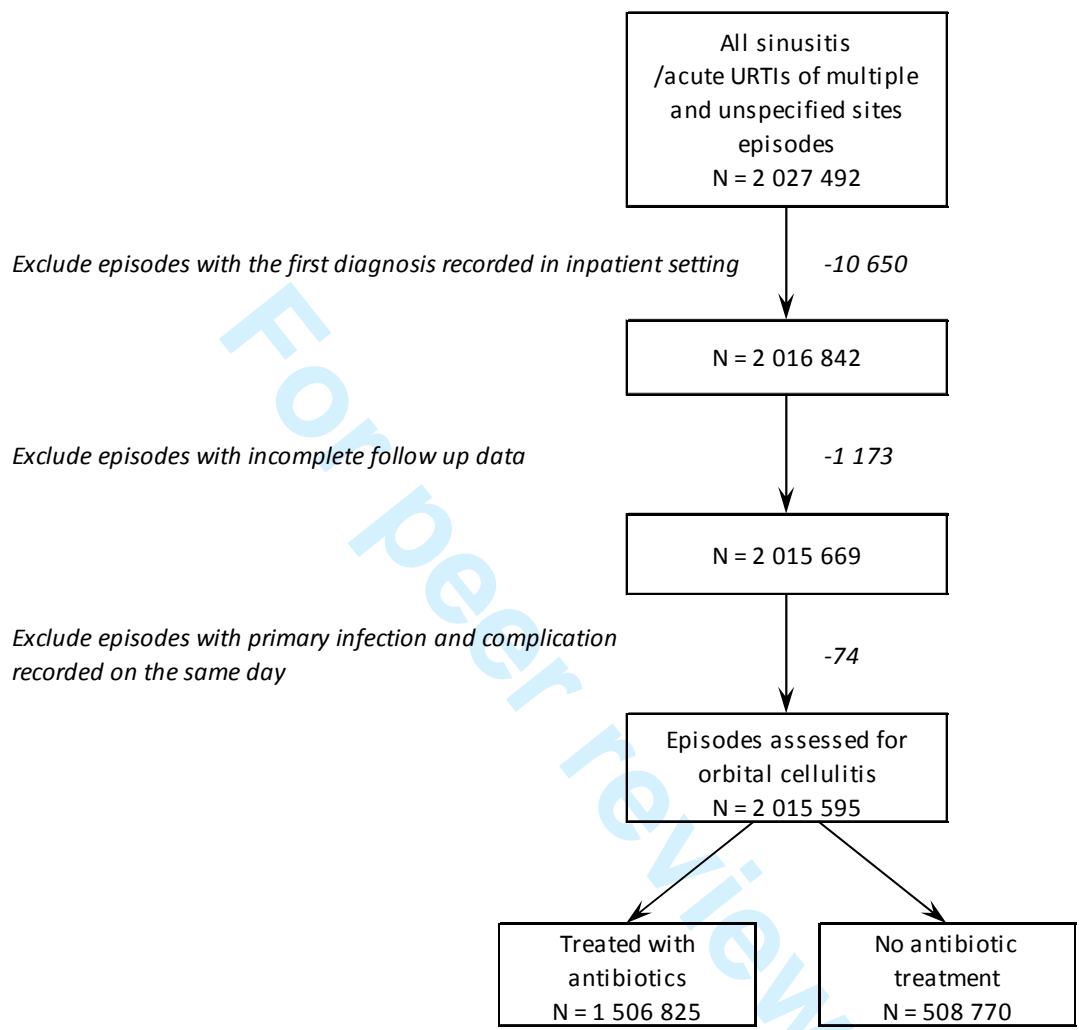

# BMJ Open

## Antibiotic use and bacterial complications following upper respiratory tract infections: a population based study

|                                 |                                                                                                                                                                                                                                                                                                                                                                                                         |
|---------------------------------|---------------------------------------------------------------------------------------------------------------------------------------------------------------------------------------------------------------------------------------------------------------------------------------------------------------------------------------------------------------------------------------------------------|
| Journal:                        | <i>BMJ Open</i>                                                                                                                                                                                                                                                                                                                                                                                         |
| Manuscript ID                   | bmjopen-2017-016221.R1                                                                                                                                                                                                                                                                                                                                                                                  |
| Article Type:                   | Research                                                                                                                                                                                                                                                                                                                                                                                                |
| Date Submitted by the Author:   | 01-Jun-2017                                                                                                                                                                                                                                                                                                                                                                                             |
| Complete List of Authors:       | Cars, Thomas; Department of Healthcare Development, Eriksson, Irene; Karolinska Institutet, Granath, Anna; Karolinska Institutet, Department of Clinical Science, Intervention and Technology Wettermark, B; Stockholm County Council, Public Healthcare Services Committee Hellman, Jenny; Public Health Agency of Sweden Norman, Christer; Folkhalsomyndigheten Ternhag, Anders; Folkhalsomyndigheten |
| <b>Primary Subject Heading</b>: | Epidemiology                                                                                                                                                                                                                                                                                                                                                                                            |
| Secondary Subject Heading:      | Infectious diseases                                                                                                                                                                                                                                                                                                                                                                                     |
| Keywords:                       | EPIDEMIOLOGY, Epidemiology < INFECTIOUS DISEASES, Infection control < INFECTIOUS DISEASES                                                                                                                                                                                                                                                                                                               |
|                                 |                                                                                                                                                                                                                                                                                                                                                                                                         |

SCHOLARONE™  
Manuscripts

only

## Antibiotic use and bacterial complications following upper respiratory tract infections: a population based study

Thomas Cars, pharmacist<sup>1</sup>, Irene Eriksson, pharmacist<sup>1,2</sup>, Anna Granath, ENT surgeon<sup>3</sup>, Björn Wettermark<sup>1,2</sup>, associate professor in pharmacoepidemiology, Jenny Hellman, pharmacist<sup>4</sup>, Christer Norman, general practitioner<sup>4</sup>, Anders Ternhag, consultant in infectious diseases<sup>2,4</sup>

<sup>1</sup> Department of Healthcare Development, Public Healthcare Services Committee, Stockholm County Council, Stockholm, Sweden

<sup>2</sup> Department of Medicine Solna, Karolinska Institutet, Stockholm, Sweden

<sup>3</sup> Department of Clinical Science, Intervention and Technology, Karolinska Institutet and Ear, Nose and Throat Clinic Karolinska University Hospital, Stockholm, Sweden

<sup>4</sup> Public Health Agency of Sweden, Solna, Sweden

Correspondence to: Thomas Cars, [thomas.cars@medsci.uu.se](mailto:thomas.cars@medsci.uu.se)

The Corresponding Author has the right to grant on behalf of all authors and does grant on behalf of all authors, a worldwide license to the Publishers and its licensees in perpetuity, in all forms, formats and media (whether known now or created in the future), to i) publish, reproduce, distribute, display and store the Contribution, ii) translate the Contribution into other languages, create adaptations, reprints, include within collections and create summaries, extracts and/or, abstracts of the Contribution, iii) create any other derivative work(s) based on the Contribution, iv) to exploit all subsidiary rights in the Contribution, v) the inclusion of electronic links from the Contribution to third party material wherever it may be located; and, vi) license any third party to do any or all of the above.

Patients were not directly involved in this study. General practitioners, specialists in infection diseases as well as representatives from health authorities were involved in the study design and the development of the outcome measure. There was no direct consumer involvement in this study. All data used in this study were anonymized, thus we do not know who the patients included in our analyses are. Therefore, the study results cannot be directly disseminated to the patients. We will however communicate the findings to the general practitioners and specialists in infection diseases involved in care of patients with upper respiratory tract infections.

## Abstract

### Objectives

To investigate if use of antibiotics was associated with bacterial complications following upper respiratory tract infections (URTIs).

### Design

Ecological time-trend analysis and a prospective cohort study.

### Setting

Primary, outpatient specialist and inpatient care in Stockholm County, Sweden. All analyses were based on administrative healthcare data on consultations, diagnoses and dispensed antibiotics from January, 2006, to January, 2016.

### Main outcome measures

Ecological time-trend analysis: 10-year trend analyses of the incidence of URTIs, bacterial infections/complications and respiratory antibiotic use.

Prospective cohort study: Incidence of bacterial complications following URTIs in antibiotic-exposed and non-exposed patients.

### Results

The utilization of respiratory tract antibiotics decreased by 22% from 2006 to 2015 but no increased trend for mastoiditis ( $p=0.0933$ ), peritonsillar abscess ( $p=0.0544$ ), invasive group A streptococcal disease ( $p=0.3991$ ), orbital abscess ( $p=0.9637$ ), extra- and subdural abscess ( $p=0.4790$ ) and pansinusitis ( $p=0.3971$ ) were observed. For meningitis and acute ethmoidal sinusitis, a decrease in the numbers of infections from 2006 to 2015 was observed ( $p=0.0038$  and  $p=0.0003$ , respectively) and for retropharyngeal and parapharyngeal abscess an increase was observed ( $p=0.0214$ ). Bacterial complications following URTIs were uncommon both in antibiotic-exposed (less than 1.5 per 10 000 episodes) and non-exposed patients (less than 1.3 per 10 000 episodes) with the exception of peritonsillar abscess after tonsillitis (risk per 10 000 tonsillitis episodes: 32.4 and 41.1 in patients with no antibiotic treatment and patients treated with antibiotics, respectively).

### Conclusions

Bacterial complications following URTIs are rare and antibiotics may lack protective effect in preventing bacterial complications. Analyses of routinely collected administrative healthcare data can provide valuable information on the number of URTIs, antibiotic use, and bacterial complications to patients, prescribers and policymakers.

## Strengths and limitations of this study

Data used in this study are population based and include information from primary, outpatient specialist and inpatient care as well as data on all drugs dispensed in ambulatory care

Data are continuously updated and loss to follow-up is minimal (only when an individual moves out of the region)

Antibiotic exposure assessment is based on the information from a drug dispensation database; no information on antibiotics administered in hospitals was available for these analyses

Outcome definitions are based on recorded diagnoses thus this study relies on the accuracy and completeness of diagnoses data

It is unknown whether the individual completed the prescribed course of antibiotic treatment

## Introduction

The use of antibiotics contributes to the emergence and spread of drug-resistant bacteria(1-3). Curbing antibiotic resistance requires coordinated action at the global, national and regional levels(4). In Sweden, a comparatively low level of antibiotic utilization has been achieved through years of strategic work at the national and regional level that has included surveillance of antibiotic utilization(5, 6) and resistance trends, development and implementation of treatment guidelines as well as educational activities targeted at healthcare professionals, patients and the general public(7).

Most antibiotics prescribed in the Swedish primary care are used for treatment of respiratory tract infections(8). Over the past 20 years such use in Sweden has gradually declined(9). Most of this decline has been attributed to limiting the inappropriate antibiotic use in viral respiratory tract infections or mild self-healing bacterial infections(10) by the implementation of stricter guidelines, for example for pharyngotonsillitis and acute otitis media(11-13). However, we know that a substantial number of antibiotic prescriptions are still issued by doctors “just in case” in fear of complications(14, 15). There is therefore a need for large studies on rare complications of upper respiratory tract infections (URTIs) in order to quantify these risks and hopefully to reduce some of the uncertainty for primary care physicians and their patients.

The objective of this study was to investigate if use of antibiotics was associated with bacterial complications following URTIs. First, we present results from an ecological time-trend analysis assessing whether the reduction in antibiotic use in URTIs was associated with a change in the incidence of bacterial complications in a large geographically defined population. Second, we present findings from a prospective cohort study based on individual patient level data describing the incidence of bacterial complications in antibiotic-exposed and non-exposed patients with URTIs.

## Methods

### Setting

We conducted both an ecological time-trend analysis and a prospective cohort study in Stockholm County, Sweden, using administrative healthcare data from 1 January, 2006, to 31 January, 2016. Because this study used only anonymized administrative healthcare data, informed consent was not required. The study was approved by the regional ethics committee in Stockholm, Sweden (Ref. no. 2015/158-31).

### Data sources

We used data from the regional healthcare data warehouse of Stockholm County (VAL) (16) and the Swedish Prescribed Drug Register(17). VAL contains comprehensive administrative healthcare data for all Stockholm County residents (around 2.3 million people, approximately 23% of the population of Sweden). Virtually all healthcare contacts financed by the Stockholm County Council are documented in VAL. From VAL we obtained the following information: demographic data (patient age and sex), diagnoses in primary care, outpatient specialist- and inpatient care (diagnoses are coded using the International Classification of Diseases [ICD-10] codes), consultation dates (for both in-person and

1  
2  
3 phone consultations), hospital admission and discharge dates, as well as migration and death records.  
4 From the Swedish Prescribed Drug Register we obtained data on dispensed antibiotics (drugs are coded  
5 using the Anatomical Therapeutic Chemical [ATC] codes).  
6  
7

## 8 **Ecological time-trend analysis**

9  
10 For the ecological time-trend analysis we used aggregate level antibiotic utilization data (exposure) and  
11 data on the incidence of bacterial complications (outcome) between 1 January, 2006, and 31 December,  
12 2015. We also assessed data on the incidence of URTIs during this period. We matched the exposure  
13 and outcomes data based on the year in which they were recorded. The list of antibiotics classified as  
14 those used to treat URTIs is provided in Supplement 1. The utilization of antibiotics was expressed as the  
15 defined daily dose (DDD) per 1000 inhabitants per day(18).  
16  
17

18 We studied the following bacterial complications: mastoiditis, meningitis, retropharyngeal and  
19 parapharyngeal abscess, invasive group A streptococcal disease, acute pansinusitis, acute ethmoidal  
20 sinusitis, orbital abscess, extradural abscess- and subdural abscess documented in inpatient care. For  
21 peritonsillar abscess, diagnoses recorded both in outpatient and in inpatient setting were included. The  
22 lists of ICD-10 codes used to define bacterial complications and primary URTIs are provided in  
23 Supplement 2 and Supplement 3, respectively.  
24  
25  
26  
27  
28

## 29 **Prospective cohort study**

### 30 ***Inclusion and exclusion criteria***

31  
32 In the prospective cohort study we included all patients with a diagnosis of acute otitis media, tonsillitis,  
33 sinusitis or acute upper respiratory tract infections of multiple and unspecified sites diagnosed in the  
34 outpatient setting (primary care or outpatient specialist care) from 1 January, 2006, to 31 December,  
35 2015 (see Supplement 3 for ICD-10 codes used to define the cohorts). The selected population was  
36 stratified into four sub-cohorts to study the incidence of bacterial complications in the antibiotic-  
37 exposed and non-exposed individuals: 1) acute otitis media cohort to study the incidence of mastoiditis  
38 and meningitis; 2) tonsillitis cohort to study the incidence of peritonsillar abscess, retropharyngeal and  
39 parapharyngeal abscess and invasive group A streptococcal disease; 3) acute sinusitis cohort to study  
40 the incidence of acute pansinusitis, orbital abscess and extra- and subdural abscess; 4) a combined  
41 cohort of patients with sinusitis and acute upper respiratory tract infections (corresponding to the  
42 ICD10-code: J06) to study the incidence of orbital cellulitis (without formation of abscess). This last  
43 combination cohort allowed identifying complications to acute rhinosinusitis, mainly of ethmoidal origin  
44 not included in the acute sinusitis cohort (the majority of this combination cohort are children). In the  
45 widespread Swedish clinical practice children displaying symptoms and signs of an orbital complication  
46 in relation to an URTI (often of viral origin) are designated as cases of acute ethmoidal sinusitis (or other  
47 types of acute sinusitis) based on the clinical findings(19). In this paper and internationally, these  
48 complications are referred to as orbital cellulitis. The cohort selection flow chart can be found in  
49 Supplement 4.  
50  
51  
52  
53  
54  
55  
56  
57  
58  
59  
60

### ***Episode definition***

As more than one diagnosis of an URTI can be recorded for the same patient, an episode was created to combine data on diagnoses and treatment attributed to the same URTI and the start and the end dates were defined for each episode (Figure 1).

The episode start date (index date) was defined as the date of the first recorded diagnosis within the episode. If there was more than a month (30 day period used in all calculations) between diagnoses, the later diagnosis was attributed to a new URTI episode. The 30 day period was based on the Swedish guidelines on URTIs (sinusitis, acute otitis media, tonsillitis) stating that new symptoms within 30 days are a relapse and not a new episode. If a dispensation of antibiotic occurred within 3 days after the latest recorded diagnosis attributed to an episode (reflecting the strategy of watchful waiting), the date of antibiotic dispensation constituted the episode end date. If a bacterial complication occurred, the date of complication diagnosis constituted the episode end date.

If a bacterial complication occurred on the same date as the episode start date this episode was excluded from our analyses. Furthermore, episodes with less than one month of follow-up were also excluded.

For all bacterial complications, if more than 6 months passed between recorded diagnoses it was defined as an incident bacterial complication. The 6 month period was chosen in order to not miss any late bacterial complications. If more than 6 months passed since the primary URTI it is highly unlikely that any new signs and symptoms would be due to the primary URTI.

### ***Exposure groups***

Patients were considered exposed to respiratory tract antibiotics if a prescription was dispensed within the episode. An episode was not considered exposed to antibiotic if the first antibiotic prescription was dispensed on the same day as the suspected bacterial complication.

### ***Outcomes***

The follow-up of patients for study outcomes started at the episode start date and continued for a one month period (30 days) after the episode end date.

The study outcomes included: 1) mastoiditis and meningitis diagnosed in inpatient setting (acute otitis media cohort); 2) peritonsillar abscess diagnosed in either outpatient or inpatient setting, retropharyngeal and parapharyngeal abscess and invasive group A streptococcal disease diagnosed in inpatient setting (tonsillitis cohort); 3) pansinusitis, orbital abscess and extra- and subdural abscess diagnosed in inpatient setting (sinusitis cohort); 4) orbital cellulitis diagnosed in inpatient setting (sinusitis and acute upper respiratory tract infections (corresponding to ICD10-code: J06) in combination cohort). ICD-10 codes used to define bacterial complications are provided in Supplement 2. We included as outcomes in the study those bacterial complications that have an established or plausible association to various URTIs.



## Statistical analyses

For the time-trend analysis, aggregate level of respiratory antibiotic utilization data (DDD per 1000 inhabitants per day, DID), number of bacterial complications per year as well as number of primary URTI episodes per year were plotted over time.

Trends for bacterial complications and respiratory antibiotic utilization (using DDD as the measure of utilization) were investigated using negative binomial regression models with annual Stockholm County population counts (as of December 31 each year) as the offset variable.

For the prospective cohort study, we calculated the number of patients experiencing episodes of URTIs and stratified these patients by age and antibiotic treatment (no antibiotic treatment group and treated with antibiotics group). We then calculated the number of bacterial complications occurring in these patients and risk of bacterial complications per 10 000 patients.

Data management and analyses were carried out using SAS 9.4 (SAS Institute, Cary, NC).

## Results

The volumes of dispensed respiratory tract antibiotics in Stockholm County declined by 22% from 2006 to 2015 (Figure 2). The number of acute otitis media and sinusitis episodes declined and the number of tonsillitis episodes was increasing from 2006 to 2012 and then sharply declined and remained stable from 2013 to 2015 (Table 1). The proportion of patients treated with antibiotics declined in the cohorts of acute otitis media (from 88% in 2006 to 81% in 2015), sinusitis (from 86% in 2006 to 71% in 2015) and sinusitis/acute URTI unspecified (from 36% in 2006 to 18% in 2015), and remained stable for tonsillitis (73% in 2006 and 73% in 2015).

In the ecological time-trend analysis we observed a significant decrease in the volumes of dispensed antibiotics from 2006 to 2015 ( $p < 0.0001$ ). During the same time period there was no significant trend in the number of the following bacterial complications: mastoiditis ( $p = 0.0933$ ), peritonsillar abscess ( $p = 0.0544$ ), invasive group A streptococcal disease ( $p = 0.3991$ ), orbital abscess ( $p = 0.9637$ ), extra- and subdural abscess ( $p = 0.4790$ ) and pansinusitis ( $p = 0.3971$ ). For meningitis and acute ethmoidal sinusitis, a decrease in the numbers of infections from 2006 to 2015 was observed ( $p = 0.0038$  and  $p = 0.0003$ , respectively) and for retropharyngeal and parapharyngeal abscess an increase was observed ( $p = 0.0214$ ). Data are presented in Figure 3.

Using individual patient level data we identified 515 156 acute otitis media, 866 378 tonsillitis, 269 215 sinusitis, and 2 015 595 sinusitis/acute upper respiratory tract infections of multiple and unspecified sites episodes (see Supplement 4 for cohort selection flow charts). Table 2 provides information on the number of bacterial complications, stratified by age and antibiotic treatment. Our data showed that all bacterial complications in URTI patients were infrequent (less than 1.5 per 10 000 episodes) with the exception of peritonsillar abscess after tonsillitis (risk per 10 000 tonsillitis episodes: 32.4 and 41.1 in patients with no antibiotic treatment and patients treated with antibiotics, respectively). Peritonsillar abscess was most common in adults aged 15 to 64 years old (risk per 10 000 tonsillitis patients aged 15 to 64: 42.2 and 67.4 in patients with no antibiotic treatment and patients treated with antibiotics, respectively).

## Discussion

The volumes of dispensed URTI antibiotics in Stockholm County decreased by 22% over a ten-year period from 2006 to 2015. Our ecological time-trend analysis covering the entire population in a large region showed that restricted use of antibiotics was not associated with an increase in bacterial complications of mastoiditis, meningitis, peritonsillar abscess, invasive group A streptococcal disease, acute pansinusitis, acute ethmoidal sinusitis, orbital abscess and extradural abscess and subdural abscess. Moreover, the number of meningitis and acute ethmoidal sinusitis complications decreased over the study period. For retropharyngeal and parapharyngeal abscess an increase was observed.

The analyses of individual level data revealed that the incidence of bacterial complications following primary URTIs was very low: the risk per 10 000 URTI episodes was less than 1.5 (average for all age groups) for all analyzed bacterial complications (with the exception of peritonsillar abscess) for both patients with no antibiotic treatment and patients treated with antibiotics. We observed a slightly higher risk of bacterial complications in the antibiotic treated group in 3 out of 9 bacterial complications studied. This can possibly be explained by the presence of confounding by indication: patients prescribed antibiotics likely had a more severe primary URTI thus were at a higher risk of both being prescribed an antibiotic and progressing to bacterial complications.

Our findings of no association between more restricted antibiotic use and the incidence of bacterial complications are in line with previous studies(10, 20-22). A previous Swedish study(23) showed that there was no increase in acute mastoiditis since 2000, when new guidelines recommending restrictive use of antibiotics for AOM were introduced. In 2010 new revised guidelines with an even more restrictive recommendation were issued(24). Our study includes data on mastoiditis in Stockholm County before and after these most restrictive recommendations, thus providing a first update on the impact of further restriction of antibiotic use in treatment of AOM. Of interest also is that while the proportion of patients with tonsillitis, sinusitis and other URTI receiving antibiotics in our study was comparable with that of Norway(25) the doctors in Stockholm prescribed antibiotics to a larger proportion of AOM patients than the doctors in Norway did. This may possibly be explained by different frameworks for coding AOM (ICD-10 vs. ICPC) and different definitions for exposure to antibiotic. Our definition of the antibiotic-exposed group included patients receiving an antibiotic anytime during their URTI episode thus likely resulting in a more complete capture of patients treated with antibiotics. Differences in definitions used can also explain discrepancies with other observational studies(20, 26). Our definition of bacterial complication only included bacterial complications recorded in inpatient care and therefore was stricter than those used in other studies (for example in comparison to analyses by Petersen et al.).

We found that a large proportion of diagnosed bacterial complications analyzed in this study were not preceded by patients seeking care for URTIs. A short duration from the onset of primary URTI to progression to bacterial complication could be an explanation for this as patient would have already developed a bacterial complication by the time of the first contact with healthcare professionals. In children, for example, the onset of symptoms and signs of mastoiditis is often very quick (within 24 hours). In this case a rapid progress of the disease is likely related to the virulence of pathogenic airway

1  
2  
3 bacteria. It has also been noted that peritonsillar abscess, the most common bacterial complication  
4 among adults in our study, often occurs without a preceding typical tonsillitis(27). Alternate routes of  
5 infection, for example oral pathogenic bacteria, may play a role in etiology of peritonsillar abscess.  
6  
7

8 The decline in meningitis and acute ethmoidal sinusitis observed in our analyses is in line with previous  
9 studies demonstrating a similar decrease in these infections after the introduction of conjugated anti-  
10 pneumococcal vaccine in the general vaccine schedule in Stockholm in 2007(28). Retropharyngeal and  
11 parapharyngeal abscesses are uncommon diseases and it was outside of scope of this study to  
12 investigate what may have contributed to the discreet increase in these complications observed during  
13 the study period. Risk factors for these heterogeneous infections are local trauma, immunosuppression,  
14 and dental infections(29).  
15  
16

17 All data used in our study are population-based and include information on diagnoses in primary,  
18 outpatient specialist and inpatient care as long as they were recorded by healthcare professionals, as  
19 well as on all dispensations of antibiotics in ambulatory care. These data are updated on a monthly basis  
20 thus enabling a real-time patient follow up. Using administrative data in general carries a number of  
21 known limitations, including reliance on the accuracy and completeness of recorded diagnoses, lack of  
22 information on antibiotics administered in the inpatient setting and inability to assert whether the  
23 patient completed the prescribed course of antibiotic treatment.  
24  
25  
26  
27

28 Our study demonstrated that routinely collected administrative healthcare data can provide valuable  
29 information on the number of URTIs, antibiotic use, and bacterial complications to patients, prescribers  
30 and policymakers. We found that bacterial complications were rare both in patients with no antibiotic  
31 treatment and in patients treated with antibiotics. While over the past decade the utilization of  
32 respiratory tract antibiotics decreased by 22% bacterial complications following URTIs remained  
33 uncommon.  
34  
35  
36  
37

### 38 Contributorship statement

39 TC, IE, AG, BW, JH, CN, AT contributed to the design of the study. TC extracted the data, wrote statistical  
40 programs and led statistical analyses. TC, IE, AG, BW, JH, CN, AT participated in the interpretation of  
41 data. TC had full access to all of the data in the study and can take responsibility for the integrity of the  
42 data and the accuracy of the data analysis. TC and IE drafted the paper. TC, IE, AG, BW, JH, CN, AT  
43 critically revised the paper for important intellectual content and approved the final version to be  
44 published.  
45  
46  
47  
48

### 49 Competing interests

50 All authors have completed the ICMJE uniform disclosure form at  
51 [http://www.icmje.org/coi\\_disclosure.pdf](http://www.icmje.org/coi_disclosure.pdf) and declare: no support from any organisation for the  
52 submitted work; no financial relationships with any organisations that might have an interest in the  
53 submitted work in the previous three years, no other relationships or activities that could appear to  
54 have influenced the submitted work.  
55  
56  
57  
58  
59  
60

## Funding

This study was funded the Stockholm County Council and The Public Health Agency of Sweden.

## Data sharing statement

Additional data are available by emailing the corresponding author.

## References

1. Bronzwaer SL, Cars O, Buchholz U, Molstad S, Goettsch W, Veldhuijzen IK, et al. A European study on the relationship between antimicrobial use and antimicrobial resistance. *Emerg Infect Dis.* 2002;8(3):278-82.
2. Goossens H, Ferech M, Vander Stichele R, Elseviers M, Group EP. Outpatient antibiotic use in Europe and association with resistance: a cross-national database study. *Lancet.* 2005;365(9459):579-87.
3. Costelloe C, Metcalfe C, Lovering A, Mant D, Hay AD. Effect of antibiotic prescribing in primary care on antimicrobial resistance in individual patients: systematic review and meta-analysis. *BMJ.* 2010;340:c2096.
4. Kaplan W, Wirtz V, Mantel-Teeuwisse A, Stolk P, Duthey B, Laing R. Priority Medicines for Europe and the World 2013 Update. Geneva: World Health Organization in collaboration with Utrecht University and Boston University. 2013.
5. Adriaenssens N, Coenen S, Versporten A, Muller A, Minalu G, Faes C, et al. European Surveillance of Antimicrobial Consumption (ESAC): outpatient antibiotic use in Europe (1997-2009). *J Antimicrob Chemother.* 2011;66 Suppl 6:vi3-12.
6. Van Boeckel TP, Gandra S, Ashok A, Caudron Q, Grenfell BT, Levin SA, et al. Global antibiotic consumption 2000 to 2010: an analysis of national pharmaceutical sales data. *Lancet Infect Dis.* 2014;14(8):742-50.
7. Molstad S, Erntell M, Hanberger H, Melander E, Norman C, Skoog G, et al. Sustained reduction of antibiotic use and low bacterial resistance: 10-year follow-up of the Swedish Strama programme. *Lancet Infect Dis.* 2008;8(2):125-32.
8. Andre M, Vernby A, Odenholt I, Lundborg CS, Axelsson I, Eriksson M, et al. Diagnosis-prescribing surveys in 2000, 2002 and 2005 in Swedish general practice: consultations, diagnosis, diagnostics and treatment choices. *Scand J Infect Dis.* 2008;40(8):648-54.
9. Public Health Agency of Sweden. A report on Swedish Antibiotic Utilisation and Resistance in Human Medicine. SWEDRES 2013. 2013.
10. Keith T, Saxena S, Murray J, Sharland M. Risk-benefit analysis of restricting antimicrobial prescribing in children: what do we really know? *Curr Opin Infect Dis.* 2010;23(3):242-8.
11. Gunnarsson MS, Sundvall PD, Gunnarsson R. In primary health care, never prescribe antibiotics to patients suspected of having an uncomplicated sore throat caused by group A beta-haemolytic streptococci without first confirming the presence of this bacterium. *Scand J Infect Dis.* 2012;44(12):915-21.
12. Centor RM. Antibiotics for sore throat patients--varied opinions. *Scand J Infect Dis.* 2013;45(3):176-8.
13. Stromberg A, Roos K, Hagberg L. [Scrap the Centor criteria in tonsillitis]. *Lakartidningen.* 2015;112.

14. Lucas PJ, Cabral C, Hay AD, Horwood J. A systematic review of parent and clinician views and perceptions that influence prescribing decisions in relation to acute childhood infections in primary care. *Scand J Prim Health Care*. 2015;33(1):11-20.
15. Kumar S, Little P, Britten N. Why do general practitioners prescribe antibiotics for sore throat? Grounded theory interview study. *BMJ*. 2003;326(7381):138.
16. Wandell P, Carlsson AC, Wettermark B, Lord G, Cars T, Ljunggren G. Most common diseases diagnosed in primary care in Stockholm, Sweden, in 2011. *Fam Pract*. 2013;30(5):506-13.
17. Wettermark B, Hammar N, Fored CM, Leimanis A, Otterblad Olausson P, Bergman U, et al. The new Swedish Prescribed Drug Register--opportunities for pharmacoepidemiological research and experience from the first six months. *Pharmacoepidemiol Drug Saf*. 2007;16(7):726-35.
18. Coenen S, Ferech M, Haaijer-Ruskamp FM, Butler CC, Vander Stichele RH, Verheij TJ, et al. European Surveillance of Antimicrobial Consumption (ESAC): quality indicators for outpatient antibiotic use in Europe. *Qual Saf Health Care*. 2007;16(6):440-5.
19. Schollin Ask L, Hultman Dennison S, Stjarne P, Granath A, Srivastava S, Eriksson M, et al. Most preschool children hospitalised for acute rhinosinusitis had orbital complications, more common in the youngest and among boys. *Acta Paediatr*. 2017;106(2):268-73.
20. Petersen I, Johnson AM, Islam A, Duckworth G, Livermore DM, Hayward AC. Protective effect of antibiotics against serious complications of common respiratory tract infections: retrospective cohort study with the UK General Practice Research Database. *BMJ*. 2007;335(7627):982.
21. Sharland M, Kendall H, Yeates D, Randall A, Hughes G, Glasziou P, et al. Antibiotic prescribing in general practice and hospital admissions for peritonsillar abscess, mastoiditis, and rheumatic fever in children: time trend analysis. *BMJ*. 2005;331(7512):328-9.
22. Hansen FS, Hoffmans R, Georgalas C, Fokkens WJ. Complications of acute rhinosinusitis in The Netherlands. *Fam Pract*. 2012;29(2):147-53.
23. Groth A, Enoksson F, Hermansson A, Hultcrantz M, Stalfors J, Stenfeldt K. Acute mastoiditis in children in Sweden 1993-2007--no increase after new guidelines. *Int J Pediatr Otorhinolaryngol*. 2011;75(12):1496-501.
24. Medical Products Agency. Behandlingsrekommendation-otit (In Swedish). Available at: [https://lakemedelsverketse/upload/halso-och-sjukvard/behandlingsrekommendationer/Akutmediaotit\\_rek\\_webbpdf](https://lakemedelsverketse/upload/halso-och-sjukvard/behandlingsrekommendationer/Akutmediaotit_rek_webbpdf) Accessed 11 May 2017. 2010.
25. Gjelstad S, Straand J, Dalen I, Fetveit A, Strom H, Lindbaek M. Do general practitioners' consultation rates influence their prescribing patterns of antibiotics for acute respiratory tract infections? *J Antimicrob Chemother*. 2011;66(10):2425-33.
26. Gulliford MC, Moore MV, Little P, Hay AD, Fox R, Prevost AT, et al. Safety of reduced antibiotic prescribing for self limiting respiratory tract infections in primary care: cohort study using electronic health records. *BMJ*. 2016;354:i3410.
27. Marom T, Cinamon U, Itskoviz D, Roth Y. Changing trends of peritonsillar abscess. *Am J Otolaryngol*. 2010;31(3):162-7.
28. Lindstrand A, Bennet R, Galanis I, Blennow M, Ask LS, Dennison SH, et al. Sinusitis and pneumonia hospitalization after introduction of pneumococcal conjugate vaccine. *Pediatrics*. 2014;134(6):e1528-36.
29. Parhiscar A, Har-El G. Deep neck abscess: a retrospective review of 210 cases. *Ann Otol Rhinol Laryngol*. 2001;110(11):1051-4.

## Tables

**Table 1. Number of episodes and antibiotic treatment for acute otitis media (cohort 1), tonsillitis (cohort 2), sinusitis (cohort 3) and sinusitis/acute upper respiratory tract infections of multiple and unspecified sites in combination (cohort 4) in Stockholm County from 2006 to 2015**

|                  | Acute otitis media      |                          | Tonsillitis             |                          | Sinusitis               |                          | Sinusitis/acute URTI unspecified |                          |
|------------------|-------------------------|--------------------------|-------------------------|--------------------------|-------------------------|--------------------------|----------------------------------|--------------------------|
|                  | No antibiotic treatment | Treated with antibiotics | No antibiotic treatment | Treated with antibiotics | No antibiotic treatment | Treated with antibiotics | No antibiotic treatment          | Treated with antibiotics |
|                  | n, %                    | n, %                     | n, %                    | n, %                     | n, %                    | n, %                     | n, %                             | n, %                     |
| 2006             | 6 414(12)               | 47 657(88)               | 20 496(27)              | 54 998(73)               | 3 744(14)               | 23 586(86)               | 108 735(64)                      | 61 658(36)               |
| 2007             | 6 971(12)               | 53 050(88)               | 23 262(26)              | 66 098(74)               | 4 364(14)               | 26 703(86)               | 123 484(64)                      | 68 564(36)               |
| 2008             | 8 374(13)               | 55 350(87)               | 25 857(27)              | 71 041(73)               | 5 065(17)               | 25 057(83)               | 138 906(69)                      | 62 195(31)               |
| 2009             | 8 260(15)               | 47 543(85)               | 27 007(29)              | 67 040(71)               | 5 942(22)               | 21 440(78)               | 149 417(74)                      | 51 323(26)               |
| 2010             | 10 266(18)              | 47 248(82)               | 27 024(28)              | 68 774(72)               | 7 361(26)               | 20 737(74)               | 160 610(76)                      | 52 044(24)               |
| 2011             | 8 773(18)               | 41 111(82)               | 23 635(25)              | 70 060(75)               | 7 531(28)               | 19 497(72)               | 167 915(77)                      | 50 351(23)               |
| 2012             | 9 464(19)               | 39 697(81)               | 24 299(24)              | 78 428(76)               | 8 377(30)               | 19 988(70)               | 172 164(78)                      | 49 398(22)               |
| 2013             | 7 933(19)               | 33 613(81)               | 20 069(27)              | 54 321(73)               | 7 150(29)               | 17 245(71)               | 160 925(80)                      | 39 023(20)               |
| 2014             | 8 271(19)               | 35 656(81)               | 20 794(28)              | 53 111(72)               | 6 453(28)               | 16 376(72)               | 161 070(81)                      | 38 395(19)               |
| 2015             | 7 858(19)               | 34 437(81)               | 19 956(27)              | 53 786(73)               | 6 949(29)               | 16 771(71)               | 172 759(82)                      | 38 556(18)               |
| <b>2006-2015</b> | <b>82 584(16)</b>       | <b>435 362(84)</b>       | <b>232 399(27)</b>      | <b>637 657(73)</b>       | <b>62 936(23)</b>       | <b>207 400(77)</b>       | <b>1 515 985(75)</b>             | <b>511 507(25)</b>       |

Table 2. Risk of bacterial complications in the month after diagnosis of upper respiratory tract infections

|                                                                             | No antibiotic treatment |                     |                | Treated with antibiotics |                     |                |
|-----------------------------------------------------------------------------|-------------------------|---------------------|----------------|--------------------------|---------------------|----------------|
|                                                                             | No of patients          | No of complications | Risk per 10000 | No of patients           | No of complications | Risk per 10000 |
| <b>Mastoiditis after acute otitis media</b>                                 |                         |                     |                |                          |                     |                |
| <b>0-4</b>                                                                  | 45 473                  | 6                   | 1.32           | 243 141                  | 23                  | 0.95           |
| <b>5-14</b>                                                                 | 21 294                  | 3                   | 1.41           | 88 741                   | 13                  | 1.46           |
| <b>15-64</b>                                                                | 12 676                  | 1                   | 0.79           | 93 582                   | 9                   | 0.96           |
| <b>65+</b>                                                                  | 2 412                   | 0                   | -              | 7 809                    | 1                   | 1.28           |
| <b>Total<sup>1</sup></b>                                                    | <b>81 864</b>           | <b>10</b>           | <b>1.22</b>    | <b>433 273</b>           | <b>46</b>           | <b>1.06</b>    |
| <b>Meningitis after acute otitis media</b>                                  |                         |                     |                |                          |                     |                |
| <b>0-4</b>                                                                  | 45 476                  | 2                   | 0.44           | 243 151                  | 1                   | 0.04           |
| <b>5-14</b>                                                                 | 21 292                  | 1                   | 0.47           | 88 746                   | 0                   | -              |
| <b>15-64</b>                                                                | 12 676                  | 1                   | 0.79           | 93 581                   | 13                  | 1.39           |
| <b>65+</b>                                                                  | 2 412                   | 0                   | -              | 7 808                    | 4                   | 5.13           |
| <b>Total<sup>1</sup></b>                                                    | <b>81 865</b>           | <b>4</b>            | <b>0.49</b>    | <b>433 286</b>           | <b>18</b>           | <b>0.42</b>    |
| <b>Peritonsillitis after pharyngotonsillitis</b>                            |                         |                     |                |                          |                     |                |
| <b>0-4</b>                                                                  | 20 772                  | 4                   | 1.93           | 116 785                  | 15                  | 1.28           |
| <b>5-14</b>                                                                 | 44 609                  | 57                  | 12.8           | 156 170                  | 183                 | 11.7           |
| <b>15-64</b>                                                                | 157 178                 | 663                 | 42.2           | 347 424                  | 2 340               | 67.4           |
| <b>65+</b>                                                                  | 9 167                   | 27                  | 29.5           | 12 552                   | 61                  | 48.6           |
| <b>Total<sup>2</sup></b>                                                    | <b>231 749</b>          | <b>751</b>          | <b>32.4</b>    | <b>632 933</b>           | <b>2 599</b>        | <b>41.1</b>    |
| <b>Retropharyngeal and parapharyngeal abscess after pharyngotonsillitis</b> |                         |                     |                |                          |                     |                |
| <b>0-4</b>                                                                  | 20 772                  | 0                   | -              | 116 811                  | 2                   | 0.17           |
| <b>5-14</b>                                                                 | 44 585                  | 0                   | -              | 156 332                  | 3                   | 0.19           |
| <b>15-64</b>                                                                | 156 805                 | 24                  | 1.53           | 349 240                  | 76                  | 2.18           |
| <b>65+</b>                                                                  | 9 154                   | 4                   | 4.37           | 12 627                   | 9                   | 7.13           |
| <b>Total<sup>2</sup></b>                                                    | <b>231 339</b>          | <b>28</b>           | <b>1.21</b>    | <b>635 012</b>           | <b>90</b>           | <b>1.42</b>    |
| <b>Invasive group A streptococcal disease after pharyngotonsillitis</b>     |                         |                     |                |                          |                     |                |
| <b>0-4</b>                                                                  | 20 772                  | 0                   | -              | 116 811                  | 0                   | -              |
| <b>5-14</b>                                                                 | 44 585                  | 0                   | -              | 156 333                  | 2                   | 0.13           |
| <b>15-64</b>                                                                | 156 806                 | 4                   | 0.26           | 349 255                  | 8                   | 0.23           |
| <b>65+</b>                                                                  | 9 155                   | 3                   | 3.28           | 12 632                   | 1                   | 0.79           |
| <b>Total<sup>2</sup></b>                                                    | <b>231 341</b>          | <b>7</b>            | <b>0.30</b>    | <b>635 033</b>           | <b>11</b>           | <b>0.17</b>    |
| <b>Orbital abscess after sinusitis</b>                                      |                         |                     |                |                          |                     |                |
| <b>0-4</b>                                                                  | 199                     | 0                   | -              | 679                      | 0                   | -              |
| <b>5-14</b>                                                                 | 1 791                   | 1                   | 5.58           | 4 333                    | 0                   | -              |
| <b>15-64</b>                                                                | 54 811                  | 0                   | -              | 181 930                  | 1                   | 0.05           |
| <b>65+</b>                                                                  | 5 637                   | 0                   | -              | 19 832                   | 0                   | -              |
| <b>Total<sup>3</sup></b>                                                    | <b>62 441</b>           | <b>1</b>            | <b>0.16</b>    | <b>206 774</b>           | <b>1</b>            | <b>0.05</b>    |



|                                                                                                                               | No antibiotic treatment |                     |                | Treated with antibiotics |                     |                |
|-------------------------------------------------------------------------------------------------------------------------------|-------------------------|---------------------|----------------|--------------------------|---------------------|----------------|
|                                                                                                                               | No of patients          | No of complications | Risk per 10000 | No of patients           | No of complications | Risk per 10000 |
| <b>Extra- and subdural abscess after sinusitis</b>                                                                            |                         |                     |                |                          |                     |                |
| <b>0-4</b>                                                                                                                    | 199                     | 0                   | -              | 679                      | 0                   | -              |
| <b>5-14</b>                                                                                                                   | 1 791                   | 0                   | -              | 4 333                    | 1                   | 2.31           |
| <b>15-64</b>                                                                                                                  | 54 811                  | 1                   | 0.18           | 181 930                  | 1                   | 0.05           |
| <b>65+</b>                                                                                                                    | 5 637                   | 0                   | -              | 19 832                   | 0                   | -              |
| <b>Total<sup>3</sup></b>                                                                                                      | <b>62 441</b>           | <b>1</b>            | <b>0.16</b>    | <b>206 774</b>           | <b>2</b>            | <b>0.10</b>    |
| <b>Acute pansinusitis after sinusitis</b>                                                                                     |                         |                     |                |                          |                     |                |
| <b>0-4</b>                                                                                                                    | 198                     | 0                   | -              | 679                      | 0                   | -              |
| <b>5-14</b>                                                                                                                   | 1 790                   | 0                   | -              | 4 330                    | 1                   | 2.31           |
| <b>15-64</b>                                                                                                                  | 54 812                  | 7                   | 1.28           | 181 923                  | 15                  | 0.82           |
| <b>65+</b>                                                                                                                    | 5 637                   | 0                   | -              | 19 832                   | 2                   | 1.01           |
| <b>Total<sup>3</sup></b>                                                                                                      | <b>62 440</b>           | <b>7</b>            | <b>1.12</b>    | <b>206 764</b>           | <b>18</b>           | <b>0.87</b>    |
| <b>Acute ethmoidal sinusitis after sinusitis / acute upper respiratory tract infections of multiple and unspecified sites</b> |                         |                     |                |                          |                     |                |
| <b>0-4</b>                                                                                                                    | 419 540                 | 39                  | 0.93           | 70 887                   | 15                  | 2.12           |
| <b>5-14</b>                                                                                                                   | 208 157                 | 21                  | 1.01           | 34 173                   | 13                  | 3.80           |
| <b>15-64</b>                                                                                                                  | 778 900                 | 4                   | 0.05           | 347 041                  | 6                   | 0.17           |
| <b>65+</b>                                                                                                                    | 100 201                 | 1                   | 0.10           | 56 669                   | 0                   | -              |
| <b>Total<sup>4</sup></b>                                                                                                      | <b>1 506 825</b>        | <b>65</b>           | <b>0.43</b>    | <b>508 770</b>           | <b>34</b>           | <b>0.67</b>    |

1. Missing information on age for 9 episodes of acute otitis media

2. Missing information on age for 25 episodes of tonsillitis

3. Missing information on age for 3 episodes of sinusitis

4. Missing information on age for 27 episodes of sinusitis

## Figure legends

Figure 1. Definition of an episode of upper respiratory tract infection (here exemplified with acute otitis media (AOM) and mastoiditis)

Figure 2. Trend for respiratory tract antibiotic utilization in Stockholm County from 2006 to 2015

Figure 3. Trend for bacterial complications in Stockholm County from 2006 to 2015.

For peer review only

1  
2  
3  
4  
5  
6  
7  
8  
9  
10  
11  
12  
13  
14  
15  
16  
17  
18  
19  
20  
21  
22  
23  
24  
25  
26  
27  
28  
29  
30  
31  
32  
33  
34  
35  
36  
37  
38  
39  
40  
41  
42  
43  
44  
45  
46  
47  
48  
49  
50  
51  
52  
53  
54  
55  
56  
57  
58  
59  
60

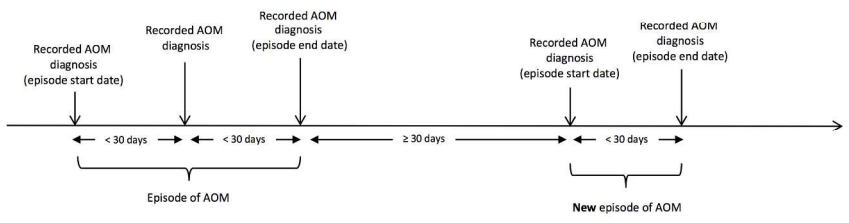

254x190mm (300 x 300 DPI)

ew only

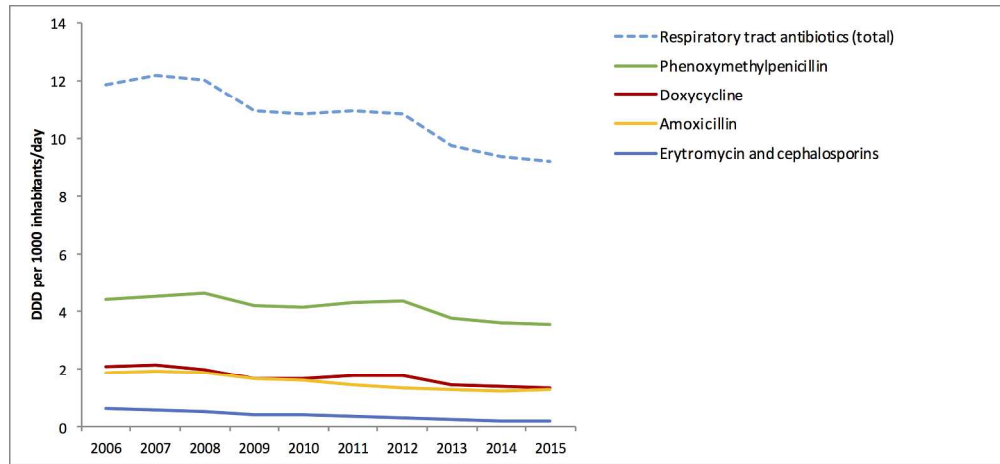

226x104mm (300 x 300 DPI)

er review only

1  
2  
3  
4  
5  
6  
7  
8  
9  
10  
11  
12  
13  
14  
15  
16  
17  
18  
19  
20  
21  
22  
23  
24  
25  
26  
27  
28  
29  
30  
31  
32  
33  
34  
35  
36  
37  
38  
39  
40  
41  
42  
43  
44  
45  
46  
47  
48  
49  
50  
51  
52  
53  
54  
55  
56  
57  
58  
59  
60

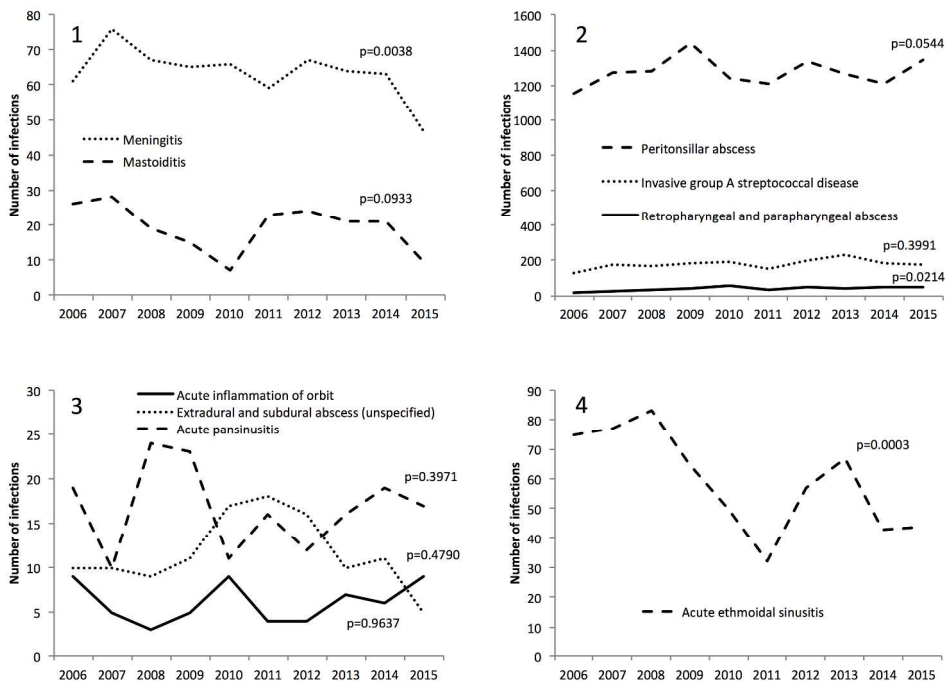

Figure 3 presents trends for bacterial complications in Stockholm County from 2006 to 2015. The four panels (1-4) corresponds to the complications we also assess in the four cohorts of the prospective cohort study (1) acute otitis media cohort, (2) tonsillitis cohort, (3) sinusitis cohort and (4) sinusitis and acute upper respiratory tract infections of multiple and unspecified sites cohort. P-values present test for trend.

254x190mm (300 x 300 DPI)

ew only

## Supplements

### Supplement 1. Antibiotics used to treat upper respiratory tract infections

| ATC code | Name of substance                 | ATC code | Name of substance                                   |
|----------|-----------------------------------|----------|-----------------------------------------------------|
| J01AA01  | demeclocycline                    | J01DD01  | cefotaxime                                          |
| J01AA02  | doxycycline                       | J01DD04  | ceftriaxone                                         |
| J01AA04  | lymecycline                       | J01DD08  | cefixime                                            |
| J01AA06  | oxytetracycline                   | J01DD13  | cefepodoxime                                        |
| J01AA07  | tetracycline                      | J01DD54  | ceftriaxone, combinations                           |
| J01AA08  | minocycline                       | J01DE01  | cefepime                                            |
| J01AA12  | tigecycline                       | J01DE02  | cefpirome                                           |
| J01BA01  | chloramphenicol                   | J01DH02  | meropenem                                           |
| J01CA01  | ampicillin                        | J01DH03  | ertapenem                                           |
| J01CA02  | pivampicillin                     | J01DH04  | doripenem                                           |
| J01CA04  | amoxicillin                       | J01DH51  | imipenem and enzyme inhibitor                       |
| J01CA06  | bacampicillin                     | J01DI02  | ceftaroline fosamil                                 |
| J01CA12  | piperacillin                      | J01EE01  | sulfamethoxazole and trimethoprim                   |
| J01CE01  | benzylpenicillin                  | J01FA01  | erythromycin                                        |
| J01CE02  | phenoxymethylpenicillin           | J01FA06  | roxithromycin                                       |
| J01CE08  | benzathine benzylpenicillin       | J01FA09  | clarithromycin                                      |
| J01CR02  | amoxicillin and enzyme inhibitor  | J01FA10  | azithromycin                                        |
| J01CR05  | piperacillin and enzyme inhibitor | J01FA15  | telithromycin                                       |
| J01CR50  | combinations of penicillins       | J01FF01  | clindamycin                                         |
| J01DA10  | cefotaxime                        | J01FF02  | lincomycin                                          |
| J01DB01  | cefalexin                         | J01FG01  | pristinamycin                                       |
| J01DB03  | cefalotin                         | J01FG02  | quinupristin/dalfopristin                           |
| J01DB04  | cefazolin                         | J01MA02  | ciprofloxacin                                       |
| J01DB05  | cefadroxil                        | J01MA12  | levofloxacin                                        |
| J01DC01  | cefoxitin                         | J01MA14  | moxifloxacin                                        |
| J01DC02  | cefuroxime                        | J01RA01  | penicillins, combinations with other antibacterials |
| J01DC04  | cefaclor                          | J01XA01  | vancomycin                                          |
| J01DC06  | cefonicid                         | J01XA02  | teicoplanin                                         |
| J01DC08  | loracarbef                        | J01XX08  | linezolid                                           |
|          |                                   | J01XX09  | daptomycin                                          |

## Supplement 2. ICD-10 codes used to identify bacterial complications

| Bacterial complication                            | ICD-10 code | ICD-10 text                                  |
|---------------------------------------------------|-------------|----------------------------------------------|
| <b>Mastoiditis</b>                                | H70.0       | Acute mastoiditis                            |
|                                                   | H70.2       | Petrositis                                   |
|                                                   | H70.9       | Mastoiditis, unspecified                     |
| <b>Meningitis</b>                                 | G00.0       | Haemophilus meningitis                       |
|                                                   | G00.1       | Pneumococcal meningitis                      |
|                                                   | G00.2       | Streptococcal meningitis                     |
|                                                   | G00.3       | Staphylococcal meningitis                    |
|                                                   | G00.9       | Bacterial meningitis, unspecified            |
| <b>Peritonsillar abscess</b>                      | J36         | Peritonsillar abscess                        |
| <b>Retropharyngeal and parapharyngeal abscess</b> | J39.0       | Retropharyngeal and parapharyngeal abscess   |
| <b>Invasive group A streptococcal disease</b>     | A40.0       | Sepsis due to streptococcus, group A         |
|                                                   | A40.9       | Streptococcal sepsis, unspecified            |
|                                                   | M72.6       | Necrotizing fasciitis                        |
| <b>Pansinusitis</b>                               | J01.4       | Acute pansinusitis                           |
| <b>Orbital abscess</b>                            | H05.0       | Acute inflammation of orbit                  |
| <b>Extra- and subdural abscess</b>                | G06.2       | Extradural and subdural abscess, unspecified |
| <b>Acute ethmoidal sinusitis</b>                  | J01.2       | Acute ethmoidal sinusitis                    |

## Supplement 3. ICD-10 codes used to identify primary URTIs

| Primary URTIs                                                                                   | ICD-10 code                                                                                          | ICD-10 text                                     |
|-------------------------------------------------------------------------------------------------|------------------------------------------------------------------------------------------------------|-------------------------------------------------|
| <b>Acute otitis media</b>                                                                       | H66.0                                                                                                | Acute suppurative otitis media                  |
|                                                                                                 | H66.9                                                                                                | Otitis media, unspecified                       |
| <b>Tonsillitis</b>                                                                              | J02                                                                                                  | Acute pharyngitis                               |
|                                                                                                 | J03                                                                                                  | Acute tonsillitis                               |
| <b>Sinusitis</b>                                                                                | J01.0                                                                                                | Acute maxillary sinusitis                       |
|                                                                                                 | J01.9                                                                                                | Acute sinusitis, unspecified                    |
|                                                                                                 | J01                                                                                                  | Acute sinusitis (for primary care records only) |
| <b>Sinusitis and acute upper respiratory tract infections of multiple and unspecified sites</b> | J01.0                                                                                                | Acute maxillary sinusitis                       |
|                                                                                                 | J01.9                                                                                                | Acute sinusitis, unspecified                    |
|                                                                                                 | J01                                                                                                  | Acute sinusitis (for primary care records only) |
|                                                                                                 | J06.0                                                                                                | Acute laryngopharyngitis                        |
|                                                                                                 | J06.9                                                                                                | Acute upper respiratory infection, unspecified  |
| J06                                                                                             | Acute upper respiratory infections of multiple and unspecified sites (for primary care records only) |                                                 |



1  
2  
3  
4  
5  
6  
7  
8  
9  
10  
11  
12  
13  
14  
15  
16  
17  
18  
19  
20  
21  
22  
23  
24  
25  
26  
27  
28  
29  
30  
31  
32  
33  
34  
35  
36  
37  
38  
39  
40  
41  
42  
43  
44  
45  
46  
47  
48  
49  
50  
51  
52  
53  
54  
55  
56  
57  
58  
59  
60

Supplement 4. Cohort selection flow-chart

1. Acute otitis media (AOM) cohort

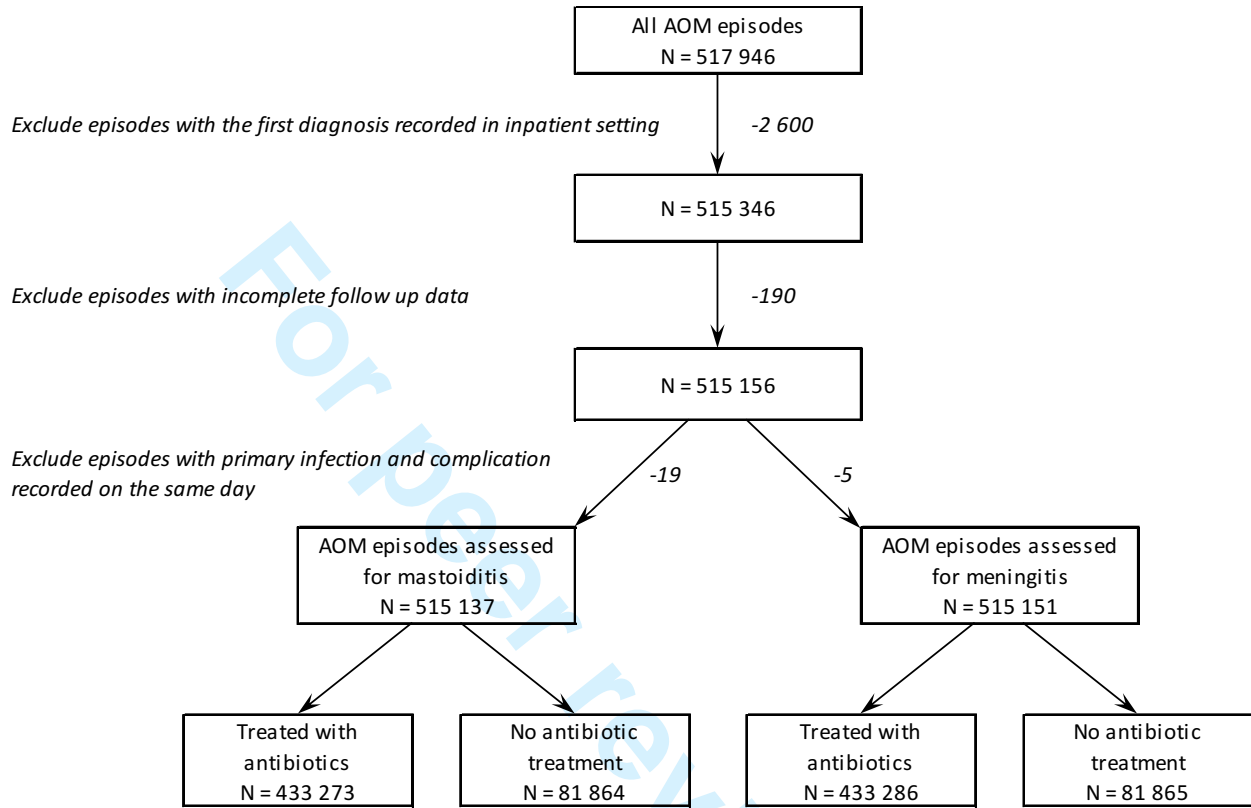

2. Tonsillitis cohort

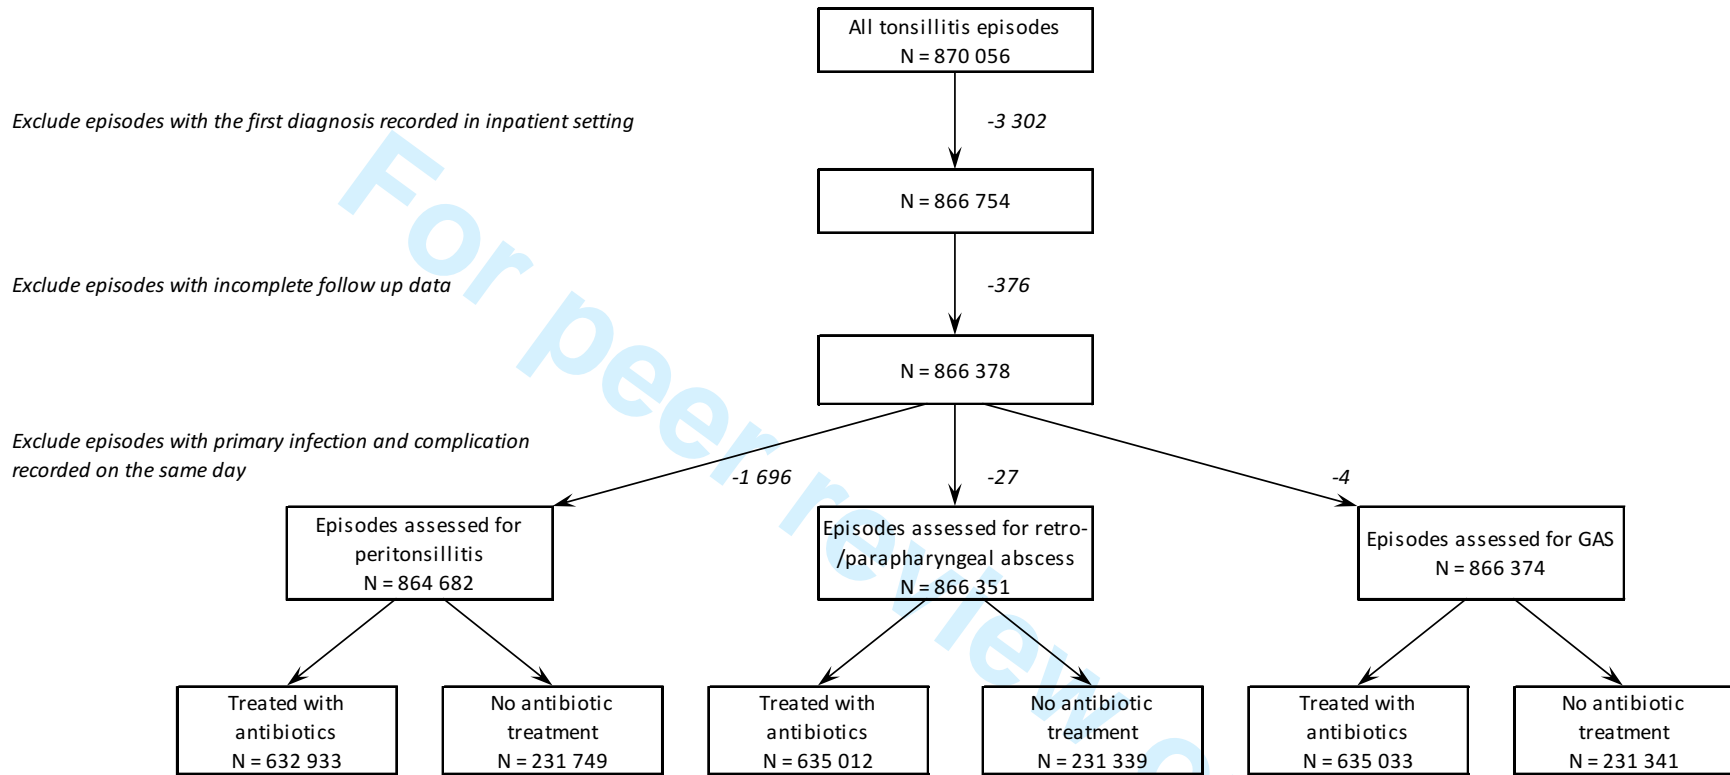

3. Acute sinusitis cohort

1  
2  
3  
4  
5  
6  
7  
8  
9  
10  
11  
12  
13  
14  
15  
16  
17  
18  
19  
20  
21  
22  
23  
24  
25  
26  
27  
28  
29  
30  
31  
32  
33  
34  
35  
36  
37  
38  
39  
40  
41  
42  
43  
44  
45  
46  
47  
48  
49

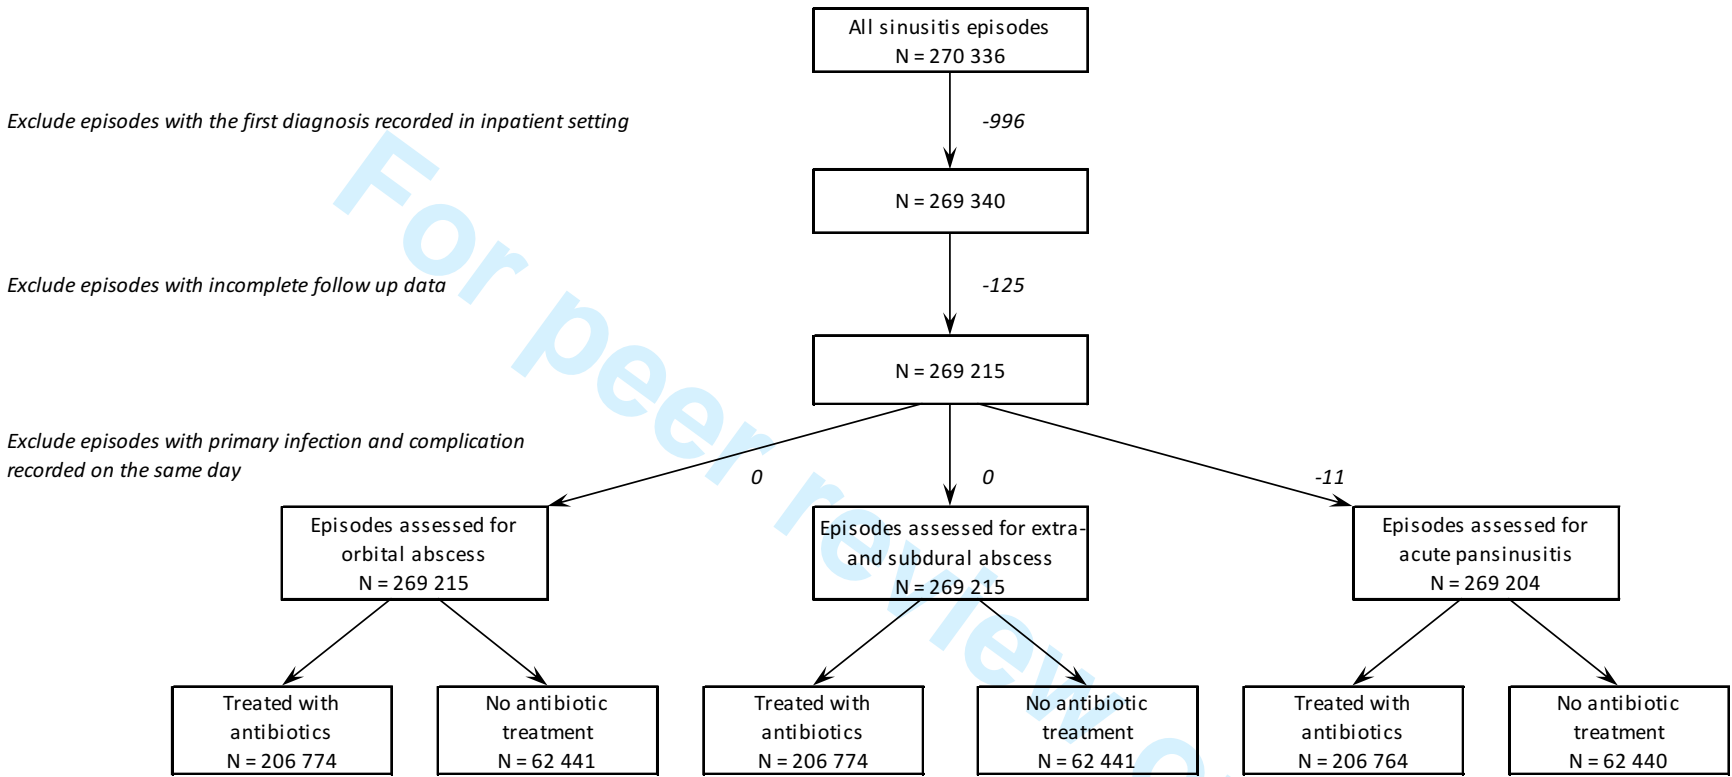

4. Acute sinusitis / acute upper respiratory tract infections of multiple and unspecified sites cohort

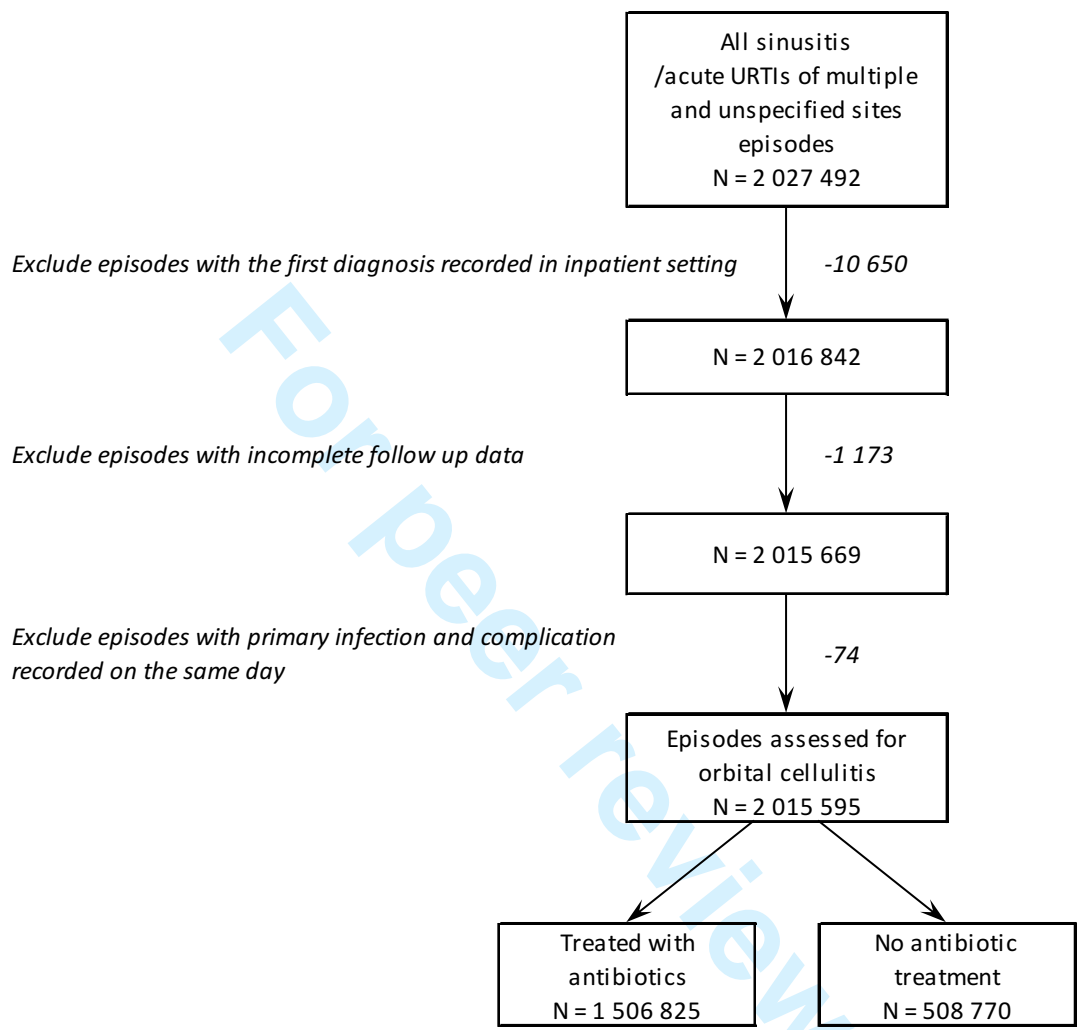

# BMJ Open

## Antibiotic use and bacterial complications following upper respiratory tract infections: a population based study

|                                 |                                                                                                                                                                                                                                                                                                                                                                                                         |
|---------------------------------|---------------------------------------------------------------------------------------------------------------------------------------------------------------------------------------------------------------------------------------------------------------------------------------------------------------------------------------------------------------------------------------------------------|
| Journal:                        | <i>BMJ Open</i>                                                                                                                                                                                                                                                                                                                                                                                         |
| Manuscript ID                   | bmjopen-2017-016221.R2                                                                                                                                                                                                                                                                                                                                                                                  |
| Article Type:                   | Research                                                                                                                                                                                                                                                                                                                                                                                                |
| Date Submitted by the Author:   | 04-Aug-2017                                                                                                                                                                                                                                                                                                                                                                                             |
| Complete List of Authors:       | Cars, Thomas; Department of Healthcare Development, Eriksson, Irene; Karolinska Institutet, Granath, Anna; Karolinska Institutet, Department of Clinical Science, Intervention and Technology Wettermark, B; Stockholm County Council, Public Healthcare Services Committee Hellman, Jenny; Public Health Agency of Sweden Norman, Christer; Folkhalsomyndigheten Ternhag, Anders; Folkhalsomyndigheten |
| <b>Primary Subject Heading</b>: | Epidemiology                                                                                                                                                                                                                                                                                                                                                                                            |
| Secondary Subject Heading:      | Infectious diseases                                                                                                                                                                                                                                                                                                                                                                                     |
| Keywords:                       | EPIDEMIOLOGY, Epidemiology < INFECTIOUS DISEASES, Infection control < INFECTIOUS DISEASES                                                                                                                                                                                                                                                                                                               |
|                                 |                                                                                                                                                                                                                                                                                                                                                                                                         |

SCHOLARONE™  
Manuscripts

only

## Antibiotic use and bacterial complications following upper respiratory tract infections: a population based study

Thomas Cars, pharmacist<sup>1</sup>, Irene Eriksson, pharmacist<sup>1,2</sup>, Anna Granath, ENT surgeon<sup>3</sup>, Björn Wettermark<sup>1,2</sup>, associate professor in pharmacoepidemiology, Jenny Hellman, pharmacist<sup>4</sup>, Christer Norman, general practitioner<sup>4</sup>, Anders Ternhag, consultant in infectious diseases<sup>2,4</sup>

<sup>1</sup> Department of Healthcare Development, Public Healthcare Services Committee, Stockholm County Council, Stockholm, Sweden

<sup>2</sup> Department of Medicine Solna, Karolinska Institutet, Stockholm, Sweden

<sup>3</sup> Department of Clinical Science, Intervention and Technology, Karolinska Institutet and Ear, Nose and Throat Clinic Karolinska University Hospital, Stockholm, Sweden

<sup>4</sup> Public Health Agency of Sweden, Solna, Sweden

Correspondence to: Thomas Cars, [thomas.cars@sll.se](mailto:thomas.cars@sll.se)

The Corresponding Author has the right to grant on behalf of all authors and does grant on behalf of all authors, a worldwide license to the Publishers and its licensees in perpetuity, in all forms, formats and media (whether known now or created in the future), to i) publish, reproduce, distribute, display and store the Contribution, ii) translate the Contribution into other languages, create adaptations, reprints, include within collections and create summaries, extracts and/or, abstracts of the Contribution, iii) create any other derivative work(s) based on the Contribution, iv) to exploit all subsidiary rights in the Contribution, v) the inclusion of electronic links from the Contribution to third party material wherever it may be located; and, vi) license any third party to do any or all of the above.

Patients were not directly involved in this study. General practitioners, specialists in infection diseases as well as representatives from health authorities were involved in the study design and the development of the outcome measure. There was no direct consumer involvement in this study. All data used in this study were anonymized, thus we do not know who the patients included in our analyses are. Therefore, the study results cannot be directly disseminated to the patients. We will however communicate the findings to the general practitioners and specialists in infection diseases involved in care of patients with upper respiratory tract infections.

## Abstract

### Objectives

To investigate if use of antibiotics was associated with bacterial complications following upper respiratory tract infections (URTIs).

### Design

Ecological time-trend analysis and a prospective cohort study.

### Setting

Primary, outpatient specialist and inpatient care in Stockholm County, Sweden. All analyses were based on administrative healthcare data on consultations, diagnoses and dispensed antibiotics from January, 2006, to January, 2016.

### Main outcome measures

Ecological time-trend analysis: 10-year trend analyses of the incidence of URTIs, bacterial infections/complications and respiratory antibiotic use.

Prospective cohort study: Incidence of bacterial complications following URTIs in antibiotic-exposed and non-exposed patients.

### Results

The utilization of respiratory tract antibiotics decreased by 22% from 2006 to 2015 but no increased trend for mastoiditis ( $p=0.0933$ ), peritonsillar abscess ( $p=0.0544$ ), invasive group A streptococcal disease ( $p=0.3991$ ), orbital abscess ( $p=0.9637$ ), extra- and subdural abscess ( $p=0.4790$ ) and pansinusitis ( $p=0.3971$ ) were observed. For meningitis and acute ethmoidal sinusitis, a decrease in the numbers of infections from 2006 to 2015 was observed ( $p=0.0038$  and  $p=0.0003$ , respectively) and for retropharyngeal and parapharyngeal abscess an increase was observed ( $p=0.0214$ ). Bacterial complications following URTIs were uncommon both in antibiotic-exposed (less than 1.5 per 10 000 episodes) and non-exposed patients (less than 1.3 per 10 000 episodes) with the exception of peritonsillar abscess after tonsillitis (risk per 10 000 tonsillitis episodes: 32.4 and 41.1 in patients with no antibiotic treatment and patients treated with antibiotics, respectively).

### Conclusions

Bacterial complications following URTIs are rare and antibiotics may lack protective effect in preventing bacterial complications. Analyses of routinely collected administrative healthcare data can provide valuable information on the number of URTIs, antibiotic use, and bacterial complications to patients, prescribers and policymakers.

## Strengths and limitations of this study

Data used in this study are population based and include information from primary, outpatient specialist and inpatient care as well as data on all drugs dispensed in ambulatory care

Data are continuously updated and loss to follow-up is minimal (only when an individual moves out of the region)

Antibiotic exposure assessment is based on the information from a drug dispensation database; no information on antibiotics administered in hospitals was available for these analyses

Outcome definitions are based on recorded diagnoses thus this study relies on the accuracy and completeness of diagnoses data

It is unknown whether the individual completed the prescribed course of antibiotic treatment



## Introduction

The use of antibiotics contributes to the emergence and spread of drug-resistant bacteria(1-3). Curbing antibiotic resistance requires coordinated action at the global, national and regional levels(4). In Sweden, a comparatively low level of antibiotic utilization has been achieved through years of strategic work at the national and regional level that has included surveillance of antibiotic utilization(5, 6) and resistance trends, development and implementation of treatment guidelines as well as educational activities targeted at healthcare professionals, patients and the general public(7).

Most antibiotics prescribed in the Swedish primary care are used for treatment of respiratory tract infections(8). Over the past 20 years such use in Sweden has gradually declined(9). Most of this decline has been attributed to limiting the inappropriate antibiotic use in viral respiratory tract infections or mild self-healing bacterial infections(10) by the implementation of stricter guidelines, for example for pharyngotonsillitis and acute otitis media(11-13). However, we know that a substantial number of antibiotic prescriptions are still issued by doctors “just in case” in fear of complications(14, 15). There is therefore a need for large studies on rare complications of upper respiratory tract infections (URTIs) in order to quantify these risks and hopefully to reduce some of the uncertainty for primary care physicians and their patients.

The objective of this study was to investigate if use of antibiotics was associated with bacterial complications following URTIs. First, we present results from an ecological time-trend analysis assessing whether the reduction in antibiotic use in URTIs was associated with a change in the incidence of bacterial complications in a large geographically defined population. Second, we present findings from a prospective cohort study based on individual patient level data describing the incidence of bacterial complications in antibiotic-exposed and non-exposed patients with URTIs.

## Methods

### Setting

We conducted both an ecological time-trend analysis and a prospective cohort study in Stockholm County, Sweden, using administrative healthcare data from 1 January, 2006, to 31 January, 2016. Because this study used only anonymized administrative healthcare data, informed consent was not required. The study was approved by the regional ethics committee in Stockholm, Sweden (Ref. no. 2015/158-31).

### Data sources

We used data from the regional healthcare data warehouse of Stockholm County (VAL) (16) and the Swedish Prescribed Drug Register(17). VAL contains comprehensive administrative healthcare data for all Stockholm County residents (around 2.3 million people, approximately 23% of the population of Sweden). Virtually all healthcare contacts financed by the Stockholm County Council are documented in VAL. From VAL we obtained the following information: demographic data (patient age and sex), diagnoses in primary care, outpatient specialist- and inpatient care (diagnoses are coded using the International Classification of Diseases [ICD-10] codes), consultation dates (for both in-person and

1  
2  
3 phone consultations), hospital admission and discharge dates, as well as migration and death records.  
4 From the Swedish Prescribed Drug Register we obtained data on dispensed antibiotics (drugs are coded  
5 using the Anatomical Therapeutic Chemical [ATC] codes).  
6  
7

## 8 **Ecological time-trend analysis**

9  
10 For the ecological time-trend analysis we used aggregate level antibiotic utilization data (exposure) and  
11 data on the incidence of bacterial complications (outcome) between 1 January, 2006, and 31 December,  
12 2015. We also assessed data on the incidence of URTIs during this period. We matched the exposure  
13 and outcomes data based on the year in which they were recorded. The list of antibiotics classified as  
14 those used to treat URTIs is provided in Supplement 1. The utilization of antibiotics was expressed as the  
15 defined daily dose (DDD) per 1000 inhabitants per day(18).  
16  
17

18 We studied the following bacterial complications: mastoiditis, meningitis, retropharyngeal and  
19 parapharyngeal abscess, invasive group A streptococcal disease, acute pansinusitis, acute ethmoidal  
20 sinusitis, orbital abscess, extradural abscess- and subdural abscess documented in inpatient care. For  
21 peritonsillar abscess, diagnoses recorded both in outpatient and in inpatient setting were included. The  
22 lists of ICD-10 codes used to define bacterial complications and primary URTIs are provided in  
23 Supplement 2 and Supplement 3, respectively.  
24  
25  
26  
27  
28

## 29 **Prospective cohort study**

### 30 ***Inclusion and exclusion criteria***

31  
32 In the prospective cohort study we included all patients with a diagnosis of acute otitis media, tonsillitis,  
33 sinusitis or acute upper respiratory tract infections of multiple and unspecified sites diagnosed in the  
34 outpatient setting (primary care or outpatient specialist care) from 1 January, 2006, to 31 December,  
35 2015 (see Supplement 3 for ICD-10 codes used to define the cohorts). The selected population was  
36 stratified into four sub-cohorts to study the incidence of bacterial complications in the antibiotic-  
37 exposed and non-exposed individuals: 1) acute otitis media cohort to study the incidence of mastoiditis  
38 and meningitis; 2) tonsillitis cohort to study the incidence of peritonsillar abscess, retropharyngeal and  
39 parapharyngeal abscess and invasive group A streptococcal disease; 3) acute sinusitis cohort to study  
40 the incidence of acute pansinusitis, orbital abscess and extra- and subdural abscess; 4) a combined  
41 cohort of patients with sinusitis and acute upper respiratory tract infections (corresponding to the  
42 ICD10-code: J06) to study the incidence of orbital cellulitis (without formation of abscess). This last  
43 combination cohort allowed identifying complications to acute rhinosinusitis, mainly of ethmoidal origin  
44 not included in the acute sinusitis cohort (the majority of this combination cohort are children). In the  
45 widespread Swedish clinical practice children displaying symptoms and signs of an orbital complication  
46 in relation to an URTI (often of viral origin) are designated as cases of acute ethmoidal sinusitis (or other  
47 types of acute sinusitis) based on the clinical findings(19). In this paper and internationally, these  
48 complications are referred to as orbital cellulitis. The cohort selection flow chart can be found in  
49 Supplement 4.  
50  
51  
52  
53  
54  
55  
56  
57  
58  
59  
60

### ***Episode definition***

As more than one diagnosis of an URTI can be recorded for the same patient, an episode was created to combine data on diagnoses and treatment attributed to the same URTI and the start and the end dates were defined for each episode (Figure 1).

The episode start date (index date) was defined as the date of the first recorded diagnosis within the episode. If there was more than a month (30 day period used in all calculations) between diagnoses, the later diagnosis was attributed to a new URTI episode. The 30 day period was based on the Swedish guidelines on URTIs (sinusitis, acute otitis media, tonsillitis) stating that new symptoms within 30 days are a relapse and not a new episode. If a dispensation of antibiotic occurred within 3 days after the latest recorded diagnosis attributed to an episode (reflecting the strategy of watchful waiting), the date of antibiotic dispensation constituted the episode end date. If a bacterial complication occurred, the date of complication diagnosis constituted the episode end date.

If a bacterial complication occurred on the same date as the episode start date this episode was excluded from our analyses. Furthermore, episodes with less than one month of follow-up were also excluded.

For all bacterial complications, if more than 6 months passed between recorded diagnoses it was defined as an incident bacterial complication. The 6 month period was chosen in order to not miss any late bacterial complications. If more than 6 months passed since the primary URTI it is highly unlikely that any new signs and symptoms would be due to the primary URTI.

### ***Exposure groups***

Patients were considered exposed to respiratory tract antibiotics if a prescription was dispensed within the episode. An episode was not considered exposed to antibiotic if the first antibiotic prescription was dispensed on the same day as the suspected bacterial complication.

### ***Outcomes***

The follow-up of patients for study outcomes started at the episode start date and continued for a one month period (30 days) after the episode end date.

The study outcomes included: 1) mastoiditis and meningitis diagnosed in inpatient setting (acute otitis media cohort); 2) peritonsillar abscess diagnosed in either outpatient or inpatient setting, retropharyngeal and parapharyngeal abscess and invasive group A streptococcal disease diagnosed in inpatient setting (tonsillitis cohort); 3) pansinusitis, orbital abscess and extra- and subdural abscess diagnosed in inpatient setting (sinusitis cohort); 4) orbital cellulitis diagnosed in inpatient setting (sinusitis and acute upper respiratory tract infections (corresponding to ICD10-code: J06) in combination cohort). ICD-10 codes used to define bacterial complications are provided in Supplement 2. We included as outcomes in the study those bacterial complications that have an established or plausible association to various URTIs.

## Statistical analyses

For the time-trend analysis, aggregate level of respiratory antibiotic utilization data (DDD per 1000 inhabitants per day, DID), number of bacterial complications per year as well as number of primary URTI episodes per year were plotted over time.

Trends for bacterial complications and respiratory antibiotic utilization (using DDD as the measure of utilization) were investigated using negative binomial regression models with annual Stockholm County population counts (as of December 31 each year) as the offset variable.

For the prospective cohort study, we calculated the number of patients experiencing episodes of URTIs and stratified these patients by age and antibiotic treatment (no antibiotic treatment group and treated with antibiotics group). We then calculated the number of bacterial complications occurring in these patients and risk of bacterial complications per 10 000 patients.

Data management and analyses were carried out using SAS 9.4 (SAS Institute, Cary, NC).

## Results

The volumes of dispensed respiratory tract antibiotics in Stockholm County declined by 22% from 2006 to 2015 (Figure 2). The number of acute otitis media and sinusitis episodes declined and the number of tonsillitis episodes was increasing from 2006 to 2012 and then sharply declined and remained stable from 2013 to 2015 (Table 1). The proportion of patients treated with antibiotics declined in the cohorts of acute otitis media (from 88% in 2006 to 81% in 2015), sinusitis (from 86% in 2006 to 71% in 2015) and sinusitis/acute URTI unspecified (from 36% in 2006 to 18% in 2015), and remained stable for tonsillitis (73% in 2006 and 73% in 2015).

In the ecological time-trend analysis we observed a significant decrease in the volumes of dispensed antibiotics from 2006 to 2015 ( $p < 0.0001$ ). During the same time period there was no significant trend in the number of the following bacterial complications: mastoiditis ( $p = 0.0933$ ), peritonsillar abscess ( $p = 0.0544$ ), invasive group A streptococcal disease ( $p = 0.3991$ ), orbital abscess ( $p = 0.9637$ ), extra- and subdural abscess ( $p = 0.4790$ ) and pansinusitis ( $p = 0.3971$ ). For meningitis and acute ethmoidal sinusitis, a decrease in the numbers of infections from 2006 to 2015 was observed ( $p = 0.0038$  and  $p = 0.0003$ , respectively) and for retropharyngeal and parapharyngeal abscess an increase was observed ( $p = 0.0214$ ). Data are presented in Figure 3.

Using individual patient level data we identified 515 156 acute otitis media, 866 378 tonsillitis, 269 215 sinusitis, and 2 015 595 sinusitis/acute upper respiratory tract infections of multiple and unspecified sites episodes (see Supplement 4 for cohort selection flow charts). Table 2 provides information on the number of bacterial complications, stratified by age and antibiotic treatment. Our data showed that all bacterial complications in URTI patients were infrequent (less than 1.5 per 10 000 episodes) with the exception of peritonsillar abscess after tonsillitis (risk per 10 000 tonsillitis episodes: 32.4 and 41.1 in patients with no antibiotic treatment and patients treated with antibiotics, respectively). Peritonsillar abscess was most common in adults aged 15 to 64 years old (risk per 10 000 tonsillitis patients aged 15 to 64: 42.2 and 67.4 in patients with no antibiotic treatment and patients treated with antibiotics, respectively).

## Discussion

The volumes of dispensed URTI antibiotics in Stockholm County decreased by 22% over a ten-year period from 2006 to 2015. Our ecological time-trend analysis covering the entire population in a large region showed that restricted use of antibiotics was not associated with an increase in bacterial complications of mastoiditis, meningitis, peritonsillar abscess, invasive group A streptococcal disease, acute pansinusitis, acute ethmoidal sinusitis, orbital abscess and extradural abscess and subdural abscess. Moreover, the number of meningitis and acute ethmoidal sinusitis complications decreased over the study period. For retropharyngeal and parapharyngeal abscess an increase was observed.

The analyses of individual level data revealed that the incidence of bacterial complications following primary URTIs was very low: the risk per 10 000 URTI episodes was less than 1.5 (average for all age groups) for all analyzed bacterial complications (with the exception of peritonsillar abscess) for both patients with no antibiotic treatment and patients treated with antibiotics. We observed a slightly higher risk of bacterial complications in the antibiotic treated group in 3 out of 9 bacterial complications studied. This can possibly be explained by the presence of confounding by indication: patients prescribed antibiotics likely had a more severe primary URTI thus were at a higher risk of both being prescribed an antibiotic and progressing to bacterial complications.

Our findings of no association between more restricted antibiotic use and the incidence of bacterial complications are in line with previous studies(10, 20-22). A previous Swedish study(23) showed that there was no increase in acute mastoiditis since 2000, when new guidelines recommending restrictive use of antibiotics for AOM were introduced. In 2010 new revised guidelines with an even more restrictive recommendation were issued(24). Our study includes data on mastoiditis in Stockholm County before and after these most restrictive recommendations, thus providing a first update on the impact of further restriction of antibiotic use in treatment of AOM. Of interest also is that while the proportion of patients with tonsillitis, sinusitis and other URTI receiving antibiotics in our study was comparable with that of Norway(25) the doctors in Stockholm prescribed antibiotics to a larger proportion of AOM patients than the doctors in Norway did. This may possibly be explained by different frameworks for coding AOM (ICD-10 vs. ICPC) and different definitions for exposure to antibiotic. Our definition of the antibiotic-exposed group included patients receiving an antibiotic anytime during their URTI episode thus likely resulting in a more complete capture of patients treated with antibiotics. Differences in definitions used can also explain discrepancies with other observational studies(20, 26). Our definition of bacterial complication only included bacterial complications recorded in inpatient care and therefore was stricter than those used in other studies (for example in comparison to analyses by Petersen et al.).

We found that a large proportion of diagnosed bacterial complications analyzed in this study were not preceded by patients seeking care for URTIs. A short duration from the onset of primary URTI to progression to bacterial complication could be an explanation for this as patient would have already developed a bacterial complication by the time of the first contact with healthcare professionals. In children, for example, the onset of symptoms and signs of mastoiditis is often very quick (within 24 hours). In this case a rapid progress of the disease is likely related to the virulence of pathogenic airway

1  
2  
3 bacteria. It has also been noted that peritonsillar abscess, the most common bacterial complication  
4 among adults in our study, often occurs without a preceding typical tonsillitis(27). Alternate routes of  
5 infection, for example oral pathogenic bacteria, may play a role in etiology of peritonsillar abscess.  
6  
7

8 The decline in meningitis and acute ethmoidal sinusitis observed in our analyses is in line with previous  
9 studies demonstrating a similar decrease in these infections after the introduction of conjugated anti-  
10 pneumococcal vaccine in the general vaccine schedule in Stockholm in 2007(28). Retropharyngeal and  
11 parapharyngeal abscesses are uncommon diseases and it was outside of scope of this study to  
12 investigate what may have contributed to the discreet increase in these complications observed during  
13 the study period. Risk factors for these heterogeneous infections are local trauma, immunosuppression,  
14 and dental infections(29).  
15  
16

17 All data used in our study are population-based and include information on diagnoses in primary,  
18 outpatient specialist and inpatient care as long as they were recorded by healthcare professionals, as  
19 well as on all dispensations of antibiotics in ambulatory care. These data are updated on a monthly basis  
20 thus enabling a real-time patient follow up. We based our selection of bacterial complications on those  
21 that we perceived have an established association to various URTIs. There could be other bacterial  
22 complications such as pneumonia that we have missed by narrowing the number of complications we  
23 looked for. Using administrative data in general carries a number of known limitations, including  
24 reliance on the accuracy and completeness of recorded diagnoses, lack of information on antibiotics  
25 administered in the inpatient setting and inability to assert whether the patient completed the  
26 prescribed course of antibiotic treatment.  
27  
28  
29  
30  
31

32 Our study demonstrated that routinely collected administrative healthcare data can provide valuable  
33 information on the number of URTIs, antibiotic use, and bacterial complications to patients, prescribers  
34 and policymakers. We found that bacterial complications were rare both in patients with no antibiotic  
35 treatment and in patients treated with antibiotics. While over the past decade the utilization of  
36 respiratory tract antibiotics decreased by 22% bacterial complications following URTIs remained  
37 uncommon.  
38  
39  
40  
41  
42

### 43 **Contributorship statement**

44 TC, IE, AG, BW, JH, CN, AT contributed to the design of the study. TC extracted the data, wrote statistical  
45 programs and led statistical analyses. TC, IE, AG, BW, JH, CN, AT participated in the interpretation of  
46 data. TC had full access to all of the data in the study and can take responsibility for the integrity of the  
47 data and the accuracy of the data analysis. TC and IE drafted the paper. TC, IE, AG, BW, JH, CN, AT  
48 critically revised the paper for important intellectual content and approved the final version to be  
49 published.  
50  
51  
52

### 53 **Competing interests**

54 All authors have completed the ICMJE uniform disclosure form at  
55 [http://www.icmje.org/coi\\_disclosure.pdf](http://www.icmje.org/coi_disclosure.pdf) and declare: no support from any organisation for the  
56  
57  
58  
59  
60

submitted work; no financial relationships with any organisations that might have an interest in the submitted work in the previous three years, no other relationships or activities that could appear to have influenced the submitted work.

## Funding

This study was funded the Stockholm County Council and The Public Health Agency of Sweden.

## Data sharing statement

Additional data are available by emailing the corresponding author.

## References

1. Bronzwaer SL, Cars O, Buchholz U, Molstad S, Goettsch W, Veldhuijzen IK, et al. A European study on the relationship between antimicrobial use and antimicrobial resistance. *Emerg Infect Dis.* 2002;8(3):278-82.
2. Goossens H, Ferech M, Vander Stichele R, Elseviers M, Group EP. Outpatient antibiotic use in Europe and association with resistance: a cross-national database study. *Lancet.* 2005;365(9459):579-87.
3. Costelloe C, Metcalfe C, Lovering A, Mant D, Hay AD. Effect of antibiotic prescribing in primary care on antimicrobial resistance in individual patients: systematic review and meta-analysis. *BMJ.* 2010;340:c2096.
4. Kaplan W, Wirtz V, Mantel-Teeuwisse A, Stolk P, Duthey B, Laing R. Priority Medicines for Europe and the World 2013 Update. Geneva: World Health Organization in collaboration with Utrecht University and Boston University. 2013.
5. Adriaenssens N, Coenen S, Versporten A, Muller A, Minalu G, Faes C, et al. European Surveillance of Antimicrobial Consumption (ESAC): outpatient antibiotic use in Europe (1997-2009). *J Antimicrob Chemother.* 2011;66 Suppl 6:vi3-12.
6. Van Boeckel TP, Gandra S, Ashok A, Caudron Q, Grenfell BT, Levin SA, et al. Global antibiotic consumption 2000 to 2010: an analysis of national pharmaceutical sales data. *Lancet Infect Dis.* 2014;14(8):742-50.
7. Molstad S, Erntell M, Hanberger H, Melander E, Norman C, Skoog G, et al. Sustained reduction of antibiotic use and low bacterial resistance: 10-year follow-up of the Swedish Strama programme. *Lancet Infect Dis.* 2008;8(2):125-32.
8. Andre M, Vernby A, Odenholt I, Lundborg CS, Axelsson I, Eriksson M, et al. Diagnosis-prescribing surveys in 2000, 2002 and 2005 in Swedish general practice: consultations, diagnosis, diagnostics and treatment choices. *Scand J Infect Dis.* 2008;40(8):648-54.
9. Public Health Agency of Sweden. A report on Swedish Antibiotic Utilisation and Resistance in Human Medicine. SWEDRES 2013. 2013.
10. Keith T, Saxena S, Murray J, Sharland M. Risk-benefit analysis of restricting antimicrobial prescribing in children: what do we really know? *Curr Opin Infect Dis.* 2010;23(3):242-8.
11. Gunnarsson MS, Sundvall PD, Gunnarsson R. In primary health care, never prescribe antibiotics to patients suspected of having an uncomplicated sore throat caused by group A beta-haemolytic streptococci without first confirming the presence of this bacterium. *Scand J Infect Dis.* 2012;44(12):915-21.



12. Centor RM. Antibiotics for sore throat patients--varied opinions. *Scand J Infect Dis.* 2013;45(3):176-8.
13. Stromberg A, Roos K, Hagberg L. [Scrap the Centor criteria in tonsillitis]. *Lakartidningen.* 2015;112.
14. Lucas PJ, Cabral C, Hay AD, Horwood J. A systematic review of parent and clinician views and perceptions that influence prescribing decisions in relation to acute childhood infections in primary care. *Scand J Prim Health Care.* 2015;33(1):11-20.
15. Kumar S, Little P, Britten N. Why do general practitioners prescribe antibiotics for sore throat? Grounded theory interview study. *BMJ.* 2003;326(7381):138.
16. Wandell P, Carlsson AC, Wettermark B, Lord G, Cars T, Ljunggren G. Most common diseases diagnosed in primary care in Stockholm, Sweden, in 2011. *Fam Pract.* 2013;30(5):506-13.
17. Wettermark B, Hammar N, Fored CM, Leimanis A, Otterblad Olausson P, Bergman U, et al. The new Swedish Prescribed Drug Register--opportunities for pharmacoepidemiological research and experience from the first six months. *Pharmacoepidemiol Drug Saf.* 2007;16(7):726-35.
18. Coenen S, Ferech M, Haaijer-Ruskamp FM, Butler CC, Vander Stichele RH, Verheij TJ, et al. European Surveillance of Antimicrobial Consumption (ESAC): quality indicators for outpatient antibiotic use in Europe. *Qual Saf Health Care.* 2007;16(6):440-5.
19. Schollin Ask L, Hultman Dennison S, Stjarne P, Granath A, Srivastava S, Eriksson M, et al. Most preschool children hospitalised for acute rhinosinusitis had orbital complications, more common in the youngest and among boys. *Acta Paediatr.* 2017;106(2):268-73.
20. Petersen I, Johnson AM, Islam A, Duckworth G, Livermore DM, Hayward AC. Protective effect of antibiotics against serious complications of common respiratory tract infections: retrospective cohort study with the UK General Practice Research Database. *BMJ.* 2007;335(7627):982.
21. Sharland M, Kendall H, Yeates D, Randall A, Hughes G, Glasziou P, et al. Antibiotic prescribing in general practice and hospital admissions for peritonsillar abscess, mastoiditis, and rheumatic fever in children: time trend analysis. *BMJ.* 2005;331(7512):328-9.
22. Hansen FS, Hoffmans R, Georgalas C, Fokkens WJ. Complications of acute rhinosinusitis in The Netherlands. *Fam Pract.* 2012;29(2):147-53.
23. Groth A, Enoksson F, Hermansson A, Hultcrantz M, Stalfors J, Stenfeldt K. Acute mastoiditis in children in Sweden 1993-2007--no increase after new guidelines. *Int J Pediatr Otorhinolaryngol.* 2011;75(12):1496-501.
24. Medical Products Agency. Behandlingsrekommendation-otit (In Swedish). Available at: [https://lakemedelsverket/se/upload/halso-och-sjukvard/behandlingsrekommendationer/Akut\\_mediaotit\\_rek\\_webbpdf](https://lakemedelsverket/se/upload/halso-och-sjukvard/behandlingsrekommendationer/Akut_mediaotit_rek_webbpdf) Accessed 11 May 2017. 2010.
25. Gjelstad S, Straand J, Dalen I, Fetveit A, Strom H, Lindbaek M. Do general practitioners' consultation rates influence their prescribing patterns of antibiotics for acute respiratory tract infections? *J Antimicrob Chemother.* 2011;66(10):2425-33.
26. Gulliford MC, Moore MV, Little P, Hay AD, Fox R, Prevost AT, et al. Safety of reduced antibiotic prescribing for self limiting respiratory tract infections in primary care: cohort study using electronic health records. *BMJ.* 2016;354:i3410.
27. Marom T, Cinamon U, Itskoviz D, Roth Y. Changing trends of peritonsillar abscess. *Am J Otolaryngol.* 2010;31(3):162-7.
28. Lindstrand A, Bennet R, Galanis I, Blennow M, Ask LS, Dennison SH, et al. Sinusitis and pneumonia hospitalization after introduction of pneumococcal conjugate vaccine. *Pediatrics.* 2014;134(6):e1528-36.
29. Parhiscar A, Har-El G. Deep neck abscess: a retrospective review of 210 cases. *Ann Otol Rhinol Laryngol.* 2001;110(11):1051-4.

1  
2  
3  
4  
5  
6  
7  
8  
9  
10  
11  
12  
13  
14  
15  
16  
17  
18  
19  
20  
21  
22  
23  
24  
25  
26  
27  
28  
29  
30  
31  
32  
33  
34  
35  
36  
37  
38  
39  
40  
41  
42  
43  
44  
45  
46  
47  
48  
49  
50  
51  
52  
53  
54  
55  
56  
57  
58  
59  
60

For peer review only

## Tables

**Table 1. Number of episodes and antibiotic treatment for acute otitis media (cohort 1), tonsillitis (cohort 2), sinusitis (cohort 3) and sinusitis/acute upper respiratory tract infections of multiple and unspecified sites in combination (cohort 4) in Stockholm County from 2006 to 2015**

|                  | Acute otitis media      |                          | Tonsillitis             |                          | Sinusitis               |                          | Sinusitis/acute URTI unspecified |                          |
|------------------|-------------------------|--------------------------|-------------------------|--------------------------|-------------------------|--------------------------|----------------------------------|--------------------------|
|                  | No antibiotic treatment | Treated with antibiotics | No antibiotic treatment | Treated with antibiotics | No antibiotic treatment | Treated with antibiotics | No antibiotic treatment          | Treated with antibiotics |
|                  | n, %                    | n, %                     | n, %                    | n, %                     | n, %                    | n, %                     | n, %                             | n, %                     |
| 2006             | 6 414(12)               | 47 657(88)               | 20 496(27)              | 54 998(73)               | 3 744(14)               | 23 586(86)               | 108 735(64)                      | 61 658(36)               |
| 2007             | 6 971(12)               | 53 050(88)               | 23 262(26)              | 66 098(74)               | 4 364(14)               | 26 703(86)               | 123 484(64)                      | 68 564(36)               |
| 2008             | 8 374(13)               | 55 350(87)               | 25 857(27)              | 71 041(73)               | 5 065(17)               | 25 057(83)               | 138 906(69)                      | 62 195(31)               |
| 2009             | 8 260(15)               | 47 543(85)               | 27 007(29)              | 67 040(71)               | 5 942(22)               | 21 440(78)               | 149 417(74)                      | 51 323(26)               |
| 2010             | 10 266(18)              | 47 248(82)               | 27 024(28)              | 68 774(72)               | 7 361(26)               | 20 737(74)               | 160 610(76)                      | 52 044(24)               |
| 2011             | 8 773(18)               | 41 111(82)               | 23 635(25)              | 70 060(75)               | 7 531(28)               | 19 497(72)               | 167 915(77)                      | 50 351(23)               |
| 2012             | 9 464(19)               | 39 697(81)               | 24 299(24)              | 78 428(76)               | 8 377(30)               | 19 988(70)               | 172 164(78)                      | 49 398(22)               |
| 2013             | 7 933(19)               | 33 613(81)               | 20 069(27)              | 54 321(73)               | 7 150(29)               | 17 245(71)               | 160 925(80)                      | 39 023(20)               |
| 2014             | 8 271(19)               | 35 656(81)               | 20 794(28)              | 53 111(72)               | 6 453(28)               | 16 376(72)               | 161 070(81)                      | 38 395(19)               |
| 2015             | 7 858(19)               | 34 437(81)               | 19 956(27)              | 53 786(73)               | 6 949(29)               | 16 771(71)               | 172 759(82)                      | 38 556(18)               |
| <b>2006-2015</b> | <b>82 584(16)</b>       | <b>435 362(84)</b>       | <b>232 399(27)</b>      | <b>637 657(73)</b>       | <b>62 936(23)</b>       | <b>207 400(77)</b>       | <b>1 515 985(75)</b>             | <b>511 507(25)</b>       |

Table 2. Risk of bacterial complications in the month after diagnosis of upper respiratory tract infections

|                                                                             | No antibiotic treatment |                     |                | Treated with antibiotics |                     |                |
|-----------------------------------------------------------------------------|-------------------------|---------------------|----------------|--------------------------|---------------------|----------------|
|                                                                             | No of patients          | No of complications | Risk per 10000 | No of patients           | No of complications | Risk per 10000 |
| <b>Mastoiditis after acute otitis media</b>                                 |                         |                     |                |                          |                     |                |
| <b>0-4</b>                                                                  | 45 473                  | 6                   | 1.32           | 243 141                  | 23                  | 0.95           |
| <b>5-14</b>                                                                 | 21 294                  | 3                   | 1.41           | 88 741                   | 13                  | 1.46           |
| <b>15-64</b>                                                                | 12 676                  | 1                   | 0.79           | 93 582                   | 9                   | 0.96           |
| <b>65+</b>                                                                  | 2 412                   | 0                   | -              | 7 809                    | 1                   | 1.28           |
| <b>Total<sup>1</sup></b>                                                    | <b>81 864</b>           | <b>10</b>           | <b>1.22</b>    | <b>433 273</b>           | <b>46</b>           | <b>1.06</b>    |
| <b>Meningitis after acute otitis media</b>                                  |                         |                     |                |                          |                     |                |
| <b>0-4</b>                                                                  | 45 476                  | 2                   | 0.44           | 243 151                  | 1                   | 0.04           |
| <b>5-14</b>                                                                 | 21 292                  | 1                   | 0.47           | 88 746                   | 0                   | -              |
| <b>15-64</b>                                                                | 12 676                  | 1                   | 0.79           | 93 581                   | 13                  | 1.39           |
| <b>65+</b>                                                                  | 2 412                   | 0                   | -              | 7 808                    | 4                   | 5.13           |
| <b>Total<sup>1</sup></b>                                                    | <b>81 865</b>           | <b>4</b>            | <b>0.49</b>    | <b>433 286</b>           | <b>18</b>           | <b>0.42</b>    |
| <b>Peritonsillitis after pharyngotonsillitis</b>                            |                         |                     |                |                          |                     |                |
| <b>0-4</b>                                                                  | 20 772                  | 4                   | 1.93           | 116 785                  | 15                  | 1.28           |
| <b>5-14</b>                                                                 | 44 609                  | 57                  | 12.8           | 156 170                  | 183                 | 11.7           |
| <b>15-64</b>                                                                | 157 178                 | 663                 | 42.2           | 347 424                  | 2 340               | 67.4           |
| <b>65+</b>                                                                  | 9 167                   | 27                  | 29.5           | 12 552                   | 61                  | 48.6           |
| <b>Total<sup>2</sup></b>                                                    | <b>231 749</b>          | <b>751</b>          | <b>32.4</b>    | <b>632 933</b>           | <b>2 599</b>        | <b>41.1</b>    |
| <b>Retropharyngeal and parapharyngeal abscess after pharyngotonsillitis</b> |                         |                     |                |                          |                     |                |
| <b>0-4</b>                                                                  | 20 772                  | 0                   | -              | 116 811                  | 2                   | 0.17           |
| <b>5-14</b>                                                                 | 44 585                  | 0                   | -              | 156 332                  | 3                   | 0.19           |
| <b>15-64</b>                                                                | 156 805                 | 24                  | 1.53           | 349 240                  | 76                  | 2.18           |
| <b>65+</b>                                                                  | 9 154                   | 4                   | 4.37           | 12 627                   | 9                   | 7.13           |
| <b>Total<sup>2</sup></b>                                                    | <b>231 339</b>          | <b>28</b>           | <b>1.21</b>    | <b>635 012</b>           | <b>90</b>           | <b>1.42</b>    |
| <b>Invasive group A streptococcal disease after pharyngotonsillitis</b>     |                         |                     |                |                          |                     |                |
| <b>0-4</b>                                                                  | 20 772                  | 0                   | -              | 116 811                  | 0                   | -              |
| <b>5-14</b>                                                                 | 44 585                  | 0                   | -              | 156 333                  | 2                   | 0.13           |
| <b>15-64</b>                                                                | 156 806                 | 4                   | 0.26           | 349 255                  | 8                   | 0.23           |
| <b>65+</b>                                                                  | 9 155                   | 3                   | 3.28           | 12 632                   | 1                   | 0.79           |
| <b>Total<sup>2</sup></b>                                                    | <b>231 341</b>          | <b>7</b>            | <b>0.30</b>    | <b>635 033</b>           | <b>11</b>           | <b>0.17</b>    |
| <b>Orbital abscess after sinusitis</b>                                      |                         |                     |                |                          |                     |                |
| <b>0-4</b>                                                                  | 199                     | 0                   | -              | 679                      | 0                   | -              |
| <b>5-14</b>                                                                 | 1 791                   | 1                   | 5.58           | 4 333                    | 0                   | -              |
| <b>15-64</b>                                                                | 54 811                  | 0                   | -              | 181 930                  | 1                   | 0.05           |
| <b>65+</b>                                                                  | 5 637                   | 0                   | -              | 19 832                   | 0                   | -              |
| <b>Total<sup>3</sup></b>                                                    | <b>62 441</b>           | <b>1</b>            | <b>0.16</b>    | <b>206 774</b>           | <b>1</b>            | <b>0.05</b>    |

|                                                                                                                               | No antibiotic treatment |                     |                | Treated with antibiotics |                     |                |
|-------------------------------------------------------------------------------------------------------------------------------|-------------------------|---------------------|----------------|--------------------------|---------------------|----------------|
|                                                                                                                               | No of patients          | No of complications | Risk per 10000 | No of patients           | No of complications | Risk per 10000 |
| <b>Extra- and subdural abscess after sinusitis</b>                                                                            |                         |                     |                |                          |                     |                |
| <b>0-4</b>                                                                                                                    | 199                     | 0                   | -              | 679                      | 0                   | -              |
| <b>5-14</b>                                                                                                                   | 1 791                   | 0                   | -              | 4 333                    | 1                   | 2.31           |
| <b>15-64</b>                                                                                                                  | 54 811                  | 1                   | 0.18           | 181 930                  | 1                   | 0.05           |
| <b>65+</b>                                                                                                                    | 5 637                   | 0                   | -              | 19 832                   | 0                   | -              |
| <b>Total<sup>3</sup></b>                                                                                                      | <b>62 441</b>           | <b>1</b>            | <b>0.16</b>    | <b>206 774</b>           | <b>2</b>            | <b>0.10</b>    |
| <b>Acute pansinusitis after sinusitis</b>                                                                                     |                         |                     |                |                          |                     |                |
| <b>0-4</b>                                                                                                                    | 198                     | 0                   | -              | 679                      | 0                   | -              |
| <b>5-14</b>                                                                                                                   | 1 790                   | 0                   | -              | 4 330                    | 1                   | 2.31           |
| <b>15-64</b>                                                                                                                  | 54 812                  | 7                   | 1.28           | 181 923                  | 15                  | 0.82           |
| <b>65+</b>                                                                                                                    | 5 637                   | 0                   | -              | 19 832                   | 2                   | 1.01           |
| <b>Total<sup>3</sup></b>                                                                                                      | <b>62 440</b>           | <b>7</b>            | <b>1.12</b>    | <b>206 764</b>           | <b>18</b>           | <b>0.87</b>    |
| <b>Acute ethmoidal sinusitis after sinusitis / acute upper respiratory tract infections of multiple and unspecified sites</b> |                         |                     |                |                          |                     |                |
| <b>0-4</b>                                                                                                                    | 419 540                 | 39                  | 0.93           | 70 887                   | 15                  | 2.12           |
| <b>5-14</b>                                                                                                                   | 208 157                 | 21                  | 1.01           | 34 173                   | 13                  | 3.80           |
| <b>15-64</b>                                                                                                                  | 778 900                 | 4                   | 0.05           | 347 041                  | 6                   | 0.17           |
| <b>65+</b>                                                                                                                    | 100 201                 | 1                   | 0.10           | 56 669                   | 0                   | -              |
| <b>Total<sup>4</sup></b>                                                                                                      | <b>1 506 825</b>        | <b>65</b>           | <b>0.43</b>    | <b>508 770</b>           | <b>34</b>           | <b>0.67</b>    |

1. Missing information on age for 9 episodes of acute otitis media
2. Missing information on age for 25 episodes of tonsillitis
3. Missing information on age for 3 episodes of sinusitis
4. Missing information on age for 27 episodes of sinusitis

1  
2  
3  
4  
5  
6  
7  
8  
9  
10  
11  
12  
13  
14  
15  
16  
17  
18  
19  
20  
21  
22  
23  
24  
25  
26  
27  
28  
29  
30  
31  
32  
33  
34  
35  
36  
37  
38  
39  
40  
41  
42  
43  
44  
45  
46  
47  
48  
49  
50  
51  
52  
53  
54  
55  
56  
57  
58  
59  
60

**Figure legends**

Figure 1. Definition of an episode of upper respiratory tract infection (here exemplified with acute otitis media (AOM) and mastoiditis)

Figure 2. Trend for respiratory tract antibiotic utilization in Stockholm County from 2006 to 2015

Figure 3. Trend for bacterial complications in Stockholm County from 2006 to 2015.

For peer review only

1  
2  
3  
4  
5  
6  
7  
8  
9  
10  
11  
12  
13  
14  
15  
16  
17  
18  
19  
20  
21  
22  
23  
24  
25  
26  
27  
28  
29  
30  
31  
32  
33  
34  
35  
36  
37  
38  
39  
40  
41  
42  
43  
44  
45  
46  
47  
48  
49  
50  
51  
52  
53  
54  
55  
56  
57  
58  
59  
60



254x190mm (300 x 300 DPI)

ew only

1  
2  
3  
4  
5  
6  
7  
8  
9  
10  
11  
12  
13  
14  
15  
16  
17  
18  
19  
20  
21  
22  
23  
24  
25  
26  
27  
28  
29  
30  
31  
32  
33  
34  
35  
36  
37  
38  
39  
40  
41  
42  
43  
44  
45  
46  
47  
48  
49  
50  
51  
52  
53  
54  
55  
56  
57  
58  
59  
60

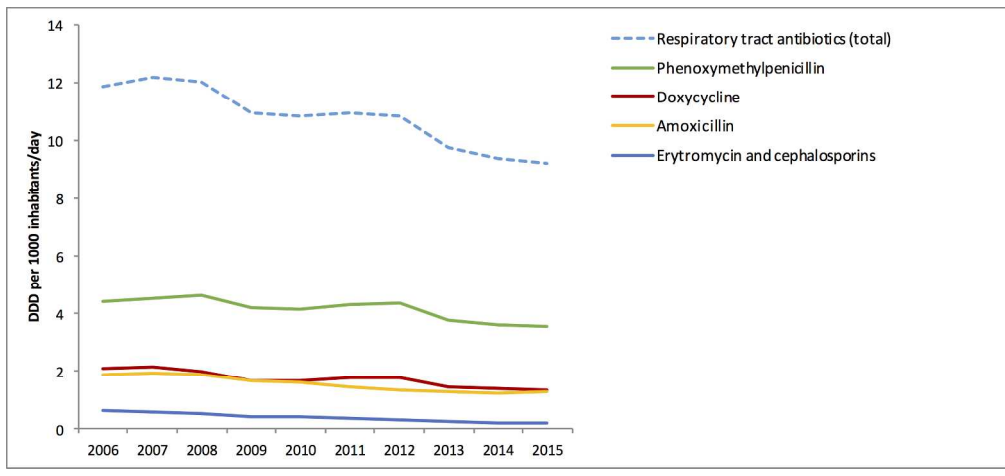

226x104mm (300 x 300 DPI)

er review only



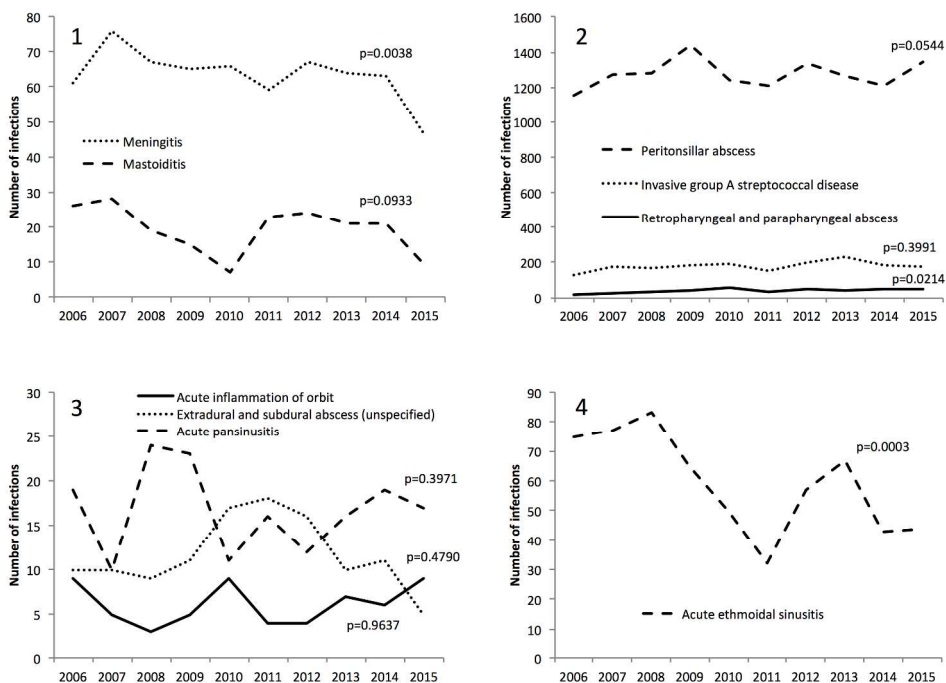

Figure 3 presents trends for bacterial complications in Stockholm County from 2006 to 2015. The four panels (1-4) corresponds to the complications we also assess in the four cohorts of the prospective cohort study (1) acute otitis media cohort, (2) tonsillitis cohort, (3) sinusitis cohort and (4) sinusitis and acute upper respiratory tract infections of multiple and unspecified sites cohort. P-values present test for trend.

254x190mm (300 x 300 DPI)

ew only

## Supplements

### Supplement 1. Antibiotics used to treat upper respiratory tract infections

| ATC code | Name of substance                 | ATC code | Name of substance                                   |
|----------|-----------------------------------|----------|-----------------------------------------------------|
| J01AA01  | demeclocycline                    | J01DD01  | cefotaxime                                          |
| J01AA02  | doxycycline                       | J01DD04  | ceftriaxone                                         |
| J01AA04  | lymecycline                       | J01DD08  | cefixime                                            |
| J01AA06  | oxytetracycline                   | J01DD13  | cefepodoxime                                        |
| J01AA07  | tetracycline                      | J01DD54  | ceftriaxone, combinations                           |
| J01AA08  | minocycline                       | J01DE01  | cefepime                                            |
| J01AA12  | tigecycline                       | J01DE02  | cefpirome                                           |
| J01BA01  | chloramphenicol                   | J01DH02  | meropenem                                           |
| J01CA01  | ampicillin                        | J01DH03  | ertapenem                                           |
| J01CA02  | pivampicillin                     | J01DH04  | doripenem                                           |
| J01CA04  | amoxicillin                       | J01DH51  | imipenem and enzyme inhibitor                       |
| J01CA06  | bacampicillin                     | J01DI02  | ceftaroline fosamil                                 |
| J01CA12  | piperacillin                      | J01EE01  | sulfamethoxazole and trimethoprim                   |
| J01CE01  | benzylpenicillin                  | J01FA01  | erythromycin                                        |
| J01CE02  | phenoxymethylpenicillin           | J01FA06  | roxithromycin                                       |
| J01CE08  | benzathine benzylpenicillin       | J01FA09  | clarithromycin                                      |
| J01CR02  | amoxicillin and enzyme inhibitor  | J01FA10  | azithromycin                                        |
| J01CR05  | piperacillin and enzyme inhibitor | J01FA15  | telithromycin                                       |
| J01CR50  | combinations of penicillins       | J01FF01  | clindamycin                                         |
| J01DA10  | cefotaxime                        | J01FF02  | lincomycin                                          |
| J01DB01  | cefalexin                         | J01FG01  | pristinamycin                                       |
| J01DB03  | cefalotin                         | J01FG02  | quinupristin/dalfopristin                           |
| J01DB04  | cefazolin                         | J01MA02  | ciprofloxacin                                       |
| J01DB05  | cefadroxil                        | J01MA12  | levofloxacin                                        |
| J01DC01  | cefoxitin                         | J01MA14  | moxifloxacin                                        |
| J01DC02  | cefuroxime                        | J01RA01  | penicillins, combinations with other antibacterials |
| J01DC04  | cefaclor                          | J01XA01  | vancomycin                                          |
| J01DC06  | cefonicid                         | J01XA02  | teicoplanin                                         |
| J01DC08  | loracarbef                        | J01XX08  | linezolid                                           |
|          |                                   | J01XX09  | daptomycin                                          |

## Supplement 2. ICD-10 codes used to identify bacterial complications

| Bacterial complication                            | ICD-10 code | ICD-10 text                                  |
|---------------------------------------------------|-------------|----------------------------------------------|
| <b>Mastoiditis</b>                                | H70.0       | Acute mastoiditis                            |
|                                                   | H70.2       | Petrositis                                   |
|                                                   | H70.9       | Mastoiditis, unspecified                     |
| <b>Meningitis</b>                                 | G00.0       | Haemophilus meningitis                       |
|                                                   | G00.1       | Pneumococcal meningitis                      |
|                                                   | G00.2       | Streptococcal meningitis                     |
|                                                   | G00.3       | Staphylococcal meningitis                    |
|                                                   | G00.9       | Bacterial meningitis, unspecified            |
| <b>Peritonsillar abscess</b>                      | J36         | Peritonsillar abscess                        |
| <b>Retropharyngeal and parapharyngeal abscess</b> | J39.0       | Retropharyngeal and parapharyngeal abscess   |
| <b>Invasive group A streptococcal disease</b>     | A40.0       | Sepsis due to streptococcus, group A         |
|                                                   | A40.9       | Streptococcal sepsis, unspecified            |
|                                                   | M72.6       | Necrotizing fasciitis                        |
| <b>Pansinusitis</b>                               | J01.4       | Acute pansinusitis                           |
| <b>Orbital abscess</b>                            | H05.0       | Acute inflammation of orbit                  |
| <b>Extra- and subdural abscess</b>                | G06.2       | Extradural and subdural abscess, unspecified |
| <b>Acute ethmoidal sinusitis</b>                  | J01.2       | Acute ethmoidal sinusitis                    |

## Supplement 3. ICD-10 codes used to identify primary URTIs

| Primary URTIs                                                                                   | ICD-10 code | ICD-10 text                                                                                          |
|-------------------------------------------------------------------------------------------------|-------------|------------------------------------------------------------------------------------------------------|
| <b>Acute otitis media</b>                                                                       | H66.0       | Acute suppurative otitis media                                                                       |
|                                                                                                 | H66.9       | Otitis media, unspecified                                                                            |
| <b>Tonsillitis</b>                                                                              | J02         | Acute pharyngitis                                                                                    |
|                                                                                                 | J03         | Acute tonsillitis                                                                                    |
| <b>Sinusitis</b>                                                                                | J01.0       | Acute maxillary sinusitis                                                                            |
|                                                                                                 | J01.9       | Acute sinusitis, unspecified                                                                         |
|                                                                                                 | J01         | Acute sinusitis (for primary care records only)                                                      |
| <b>Sinusitis and acute upper respiratory tract infections of multiple and unspecified sites</b> | J01.0       | Acute maxillary sinusitis                                                                            |
|                                                                                                 | J01.9       | Acute sinusitis, unspecified                                                                         |
|                                                                                                 | J01         | Acute sinusitis (for primary care records only)                                                      |
|                                                                                                 | J06.0       | Acute laryngopharyngitis                                                                             |
|                                                                                                 | J06.9       | Acute upper respiratory infection, unspecified                                                       |
|                                                                                                 | J06         | Acute upper respiratory infections of multiple and unspecified sites (for primary care records only) |

Supplement 4. Cohort selection flow-chart

1. Acute otitis media (AOM) cohort

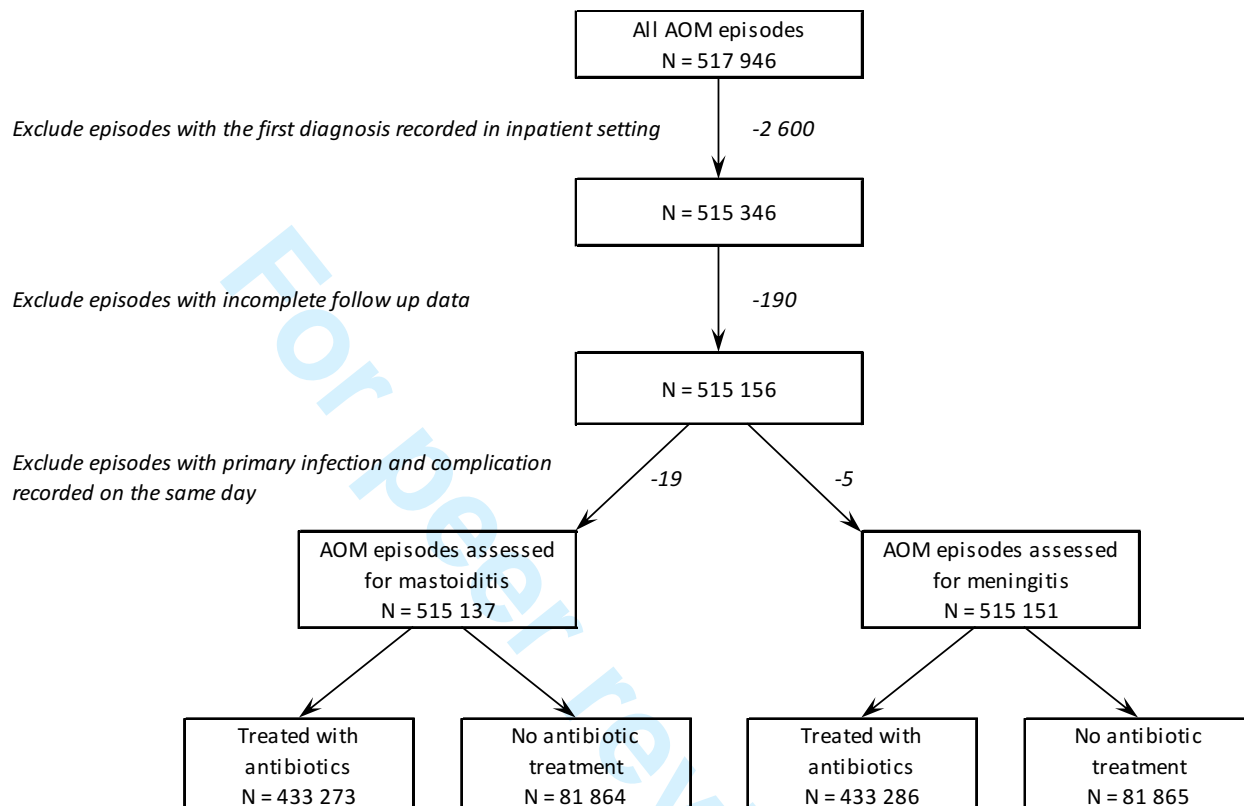

2. Tonsillitis cohort

1  
2  
3  
4  
5  
6  
7  
8  
9  
10  
11  
12  
13  
14  
15  
16  
17  
18  
19  
20  
21  
22  
23  
24  
25  
26  
27  
28  
29  
30  
31  
32  
33  
34  
35  
36  
37  
38  
39  
40  
41  
42  
43  
44  
45  
46  
47  
48  
49

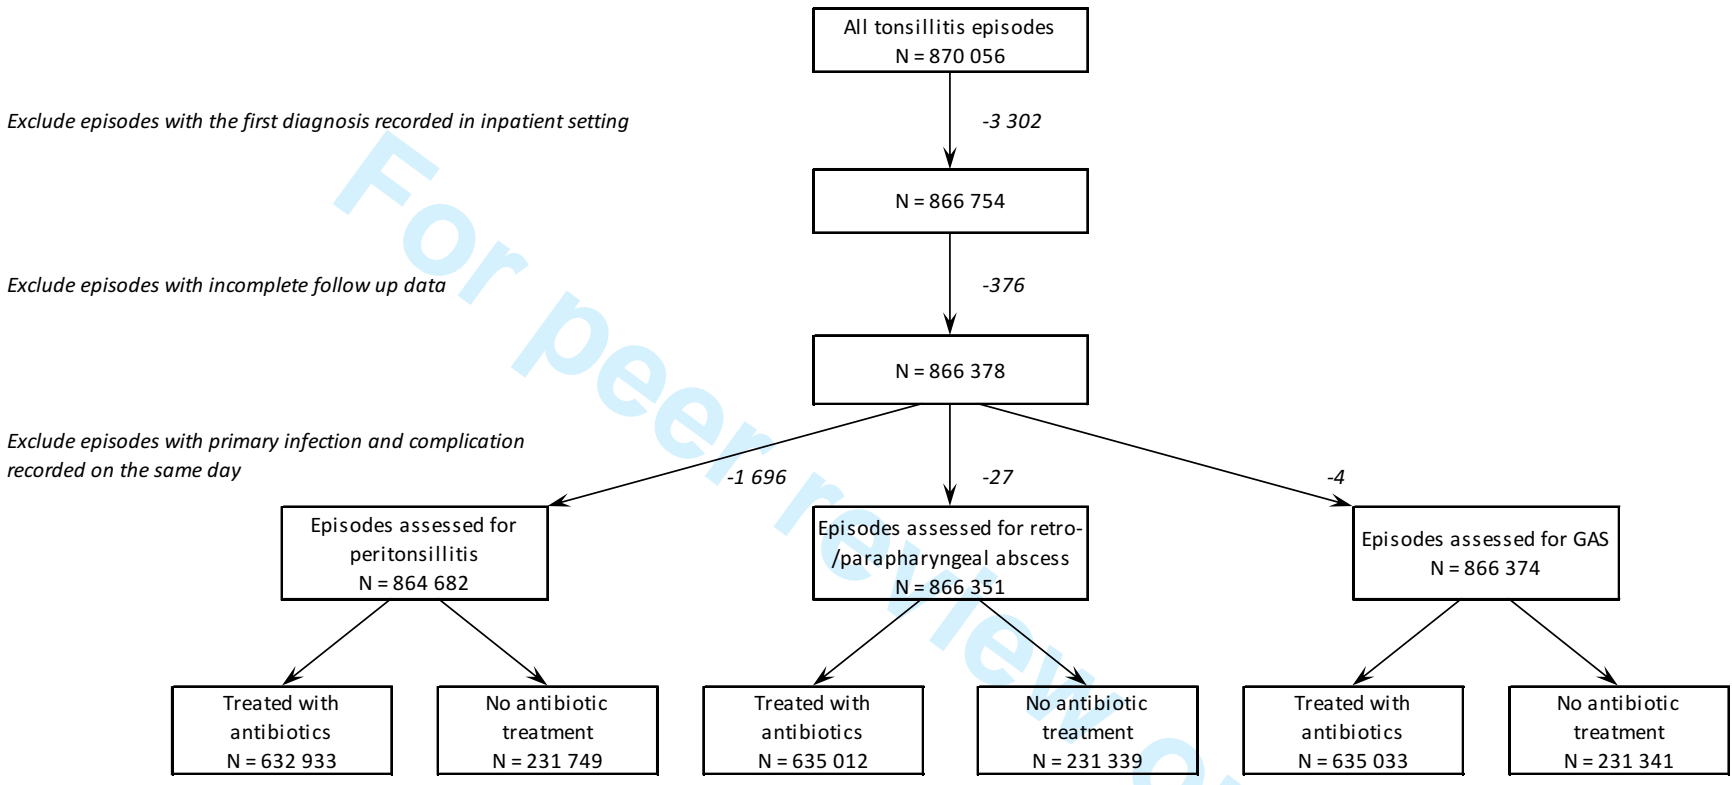

3. Acute sinusitis cohort

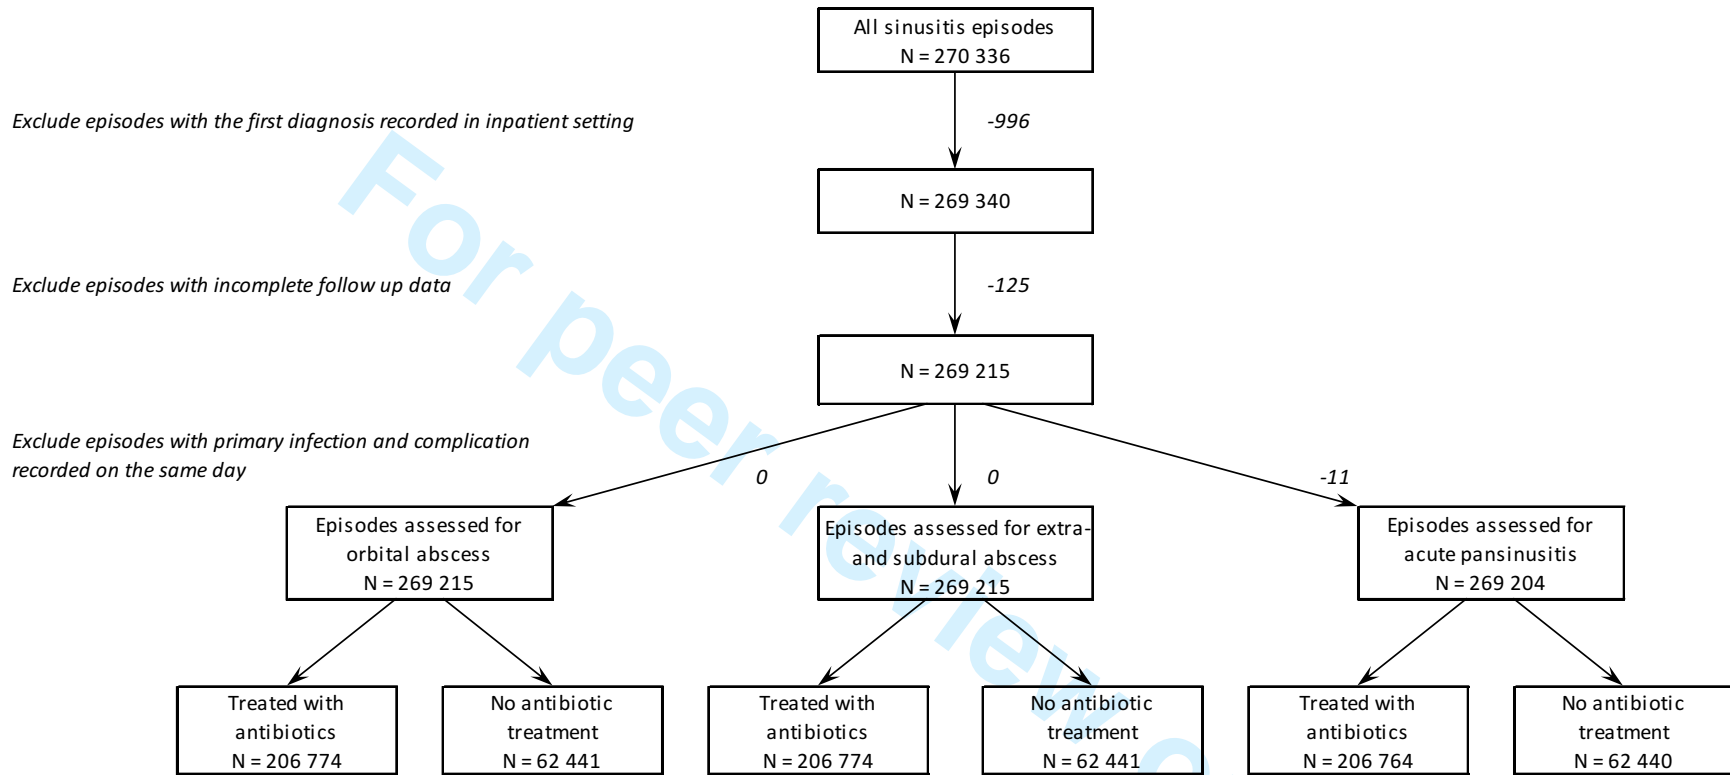

4. Acute sinusitis / acute upper respiratory tract infections of multiple and unspecified sites cohort

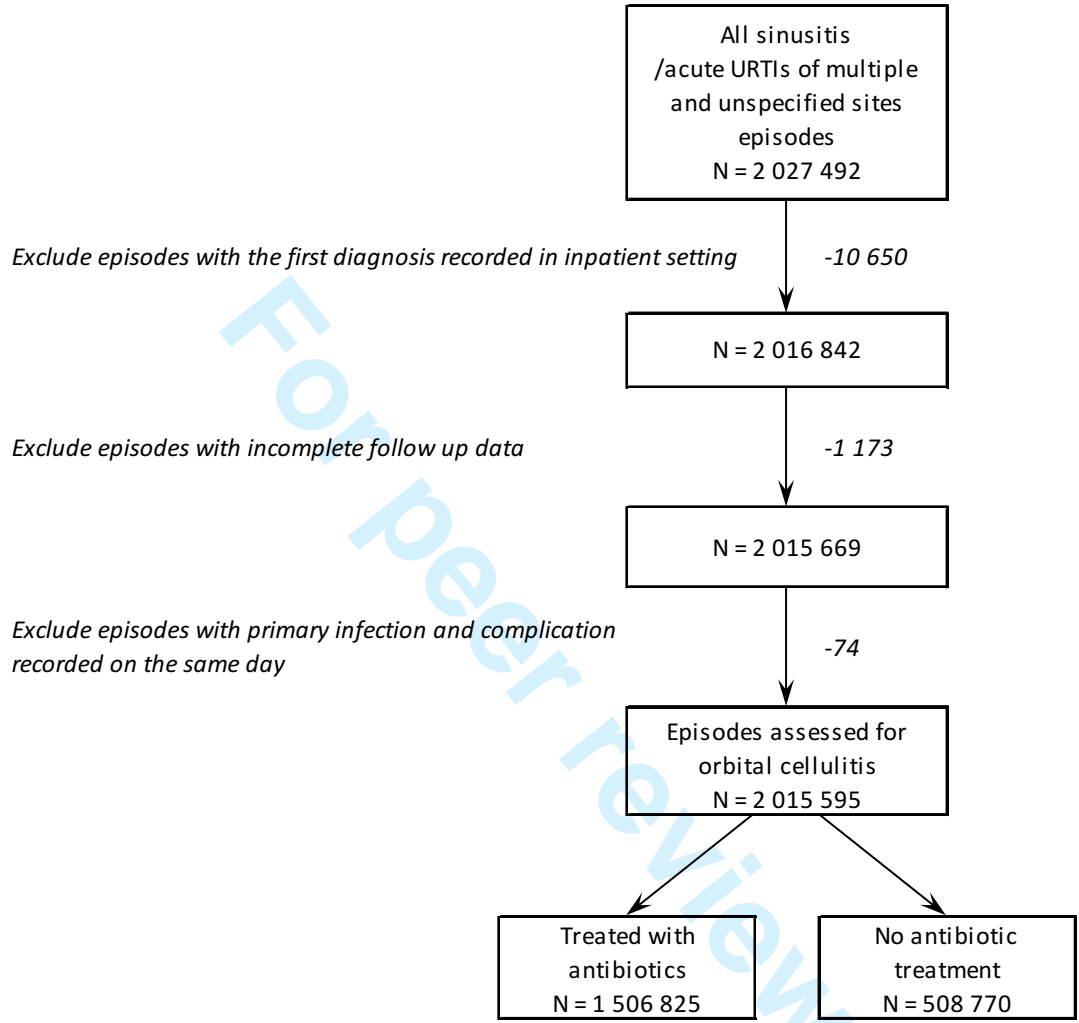

Supplement: bmjopen-2017-016221.draft_revisions.pdf [file bmjopen-2017-016221.draft_revisions.pdf]
