# Supplementary material for: Antibiotic use and bacterial complications following upper respiratory tract infections: a population-based study
Source: PubMed Central journal article supplement — BMJ Open. 2017 Nov 15;7(11):e016221. doi: 10.1136/bmjopen-2017-016221 (PMC5695332; doi:10.1136/bmjopen-2017-016221), 2017-11-15

## Supplements

Supplement 1. List of antibiotics classified as those to treat upper respiratory tract infections

| ATC code | Name of substance                 | ATC code | Name of substance                                   |
|----------|-----------------------------------|----------|-----------------------------------------------------|
| J01AA01  | demeclocycline                    | J01DD01  | cefotaxime                                          |
| J01AA02  | doxycycline                       | J01DD04  | ceftriaxone                                         |
| J01AA04  | lymecycline                       | J01DD08  | cefixime                                            |
| J01AA06  | oxytetracycline                   | J01DD13  | cefpodoxime                                         |
| J01AA07  | tetracycline                      | J01DD54  | ceftriaxone, combinations                           |
| J01AA08  | minocycline                       | J01DE01  | cefepime                                            |
| J01AA12  | tigecycline                       | J01DE02  | cefpirome                                           |
| J01BA01  | chloramphenicol                   | J01DH02  | meropenem                                           |
| J01CA01  | ampicillin                        | J01DH03  | ertapenem                                           |
| J01CA02  | pivampicillin                     | J01DH04  | doripenem                                           |
| J01CA04  | amoxicillin                       | J01DH51  | imipenem and enzyme inhibitor                       |
| J01CA06  | bacampicillin                     | J01DI02  | ceftaroline fosamil                                 |
| J01CA12  | piperacillin                      | J01EE01  | sulfamethoxazole and trimethoprim                   |
| J01CE01  | benzylpenicillin                  | J01FA01  | erythromycin                                        |
| J01CE02  | phenoxymethylpenicillin           | J01FA06  | roxithromycin                                       |
| J01CE08  | benzathine benzylpenicillin       | J01FA09  | clarithromycin                                      |
| J01CR02  | amoxicillin and enzyme inhibitor  | J01FA10  | azithromycin                                        |
| J01CR05  | piperacillin and enzyme inhibitor | J01FA15  | telithromycin                                       |
| J01CR50  | combinations of penicillins       | J01FF01  | clindamycin                                         |
| J01DA10  | cefotaxime                        | J01FF02  | lincomycin                                          |
| J01DB01  | cefalexin                         | J01FG01  | pristinamycin                                       |
| J01DB03  | cefalotin                         | J01FG02  | quinupristin/dalfopristin                           |
| J01DB04  | cefazolin                         | J01MA02  | ciprofloxacin                                       |
| J01DB05  | cefadroxil                        | J01MA12  | levofloxacin                                        |
| J01DC01  | cefoxitin                         | J01MA14  | moxifloxacin                                        |
| J01DC02  | cefuroxime                        | J01RA01  | penicillins, combinations with other antibacterials |
| J01DC04  | cefaclor                          | J01XA01  | vancomycin                                          |
| J01DC06  | cefonicid                         | J01XA02  | teicoplanin                                         |
| J01DC08  | loracarbef                        | J01XX08  | linezolid                                           |
|          |                                   | J01XX09  | daptomycin                                          |

Supplement 2. ICD-10 codes used to identify bacterial complications

| <b>Bacterial complication</b>                     | <b>ICD-10 code</b> | <b>ICD-10 text</b>                           |
|---------------------------------------------------|--------------------|----------------------------------------------|
| <b>Mastoiditis</b>                                | H70.0              | Acute mastoiditis                            |
|                                                   | H70.2              | Petrositis                                   |
|                                                   | H70.9              | Mastoiditis, unspecified                     |
| <b>Meningitis</b>                                 | G00.0              | Haemophilus meningitis                       |
|                                                   | G00.1              | Pneumococcal meningitis                      |
|                                                   | G00.2              | Streptococcal meningitis                     |
|                                                   | G00.3              | Staphylococcal meningitis                    |
|                                                   | G00.9              | Bacterial meningitis, unspecified            |
| <b>Peritonsillar abscess</b>                      | J36                | Peritonsillar abscess                        |
| <b>Retropharyngeal and parapharyngeal abscess</b> | J39.0              | Retropharyngeal and parapharyngeal abscess   |
| <b>Invasive group A streptococcal disease</b>     | A40.0              | Sepsis due to streptococcus, group A         |
|                                                   | A40.9              | Streptococcal sepsis, unspecified            |
|                                                   | M72.6              | Necrotizing fasciitis                        |
| <b>Pansinusitis</b>                               | J01.4              | Acute pansinusitis                           |
| <b>Orbital abscess</b>                            | H05.0              | Acute inflammation of orbit                  |
| <b>Extra- and subdural abscess</b>                | G06.2              | Extradural and subdural abscess, unspecified |
| <b>Acute ethmoidal sinusitis</b>                  | J01.2              | Acute ethmoidal sinusitis                    |

Supplement 3. ICD-10 codes used to identify primary URTIs

| Primary URTIs                                                                                   | ICD-10 code | ICD-10 text                                                                                          |
|-------------------------------------------------------------------------------------------------|-------------|------------------------------------------------------------------------------------------------------|
| <b>Acute otitis media</b>                                                                       | H66.0       | Acute suppurative otitis media                                                                       |
|                                                                                                 | H66.9       | Otitis media, unspecified                                                                            |
| <b>Tonsillitis</b>                                                                              | J02         | Acute pharyngitis                                                                                    |
|                                                                                                 | J03         | Acute tonsillitis                                                                                    |
| <b>Sinusitis</b>                                                                                | J01.0       | Acute maxillary sinusitis                                                                            |
|                                                                                                 | J01.9       | Acute sinusitis, unspecified                                                                         |
|                                                                                                 | J01         | Acute sinusitis (for primary care records only)                                                      |
| <b>Sinusitis and acute upper respiratory tract infections of multiple and unspecified sites</b> | J01.0       | Acute maxillary sinusitis                                                                            |
|                                                                                                 | J01.9       | Acute sinusitis, unspecified                                                                         |
|                                                                                                 | J01         | Acute sinusitis (for primary care records only)                                                      |
|                                                                                                 | J06.0       | Acute laryngopharyngitis                                                                             |
|                                                                                                 | J06.9       | Acute upper respiratory infection, unspecified                                                       |
|                                                                                                 | J06         | Acute upper respiratory infections of multiple and unspecified sites (for primary care records only) |

**Supplement 4. Cohort selection flow-chart**

**1. Acute otitis media (AOM) cohort**

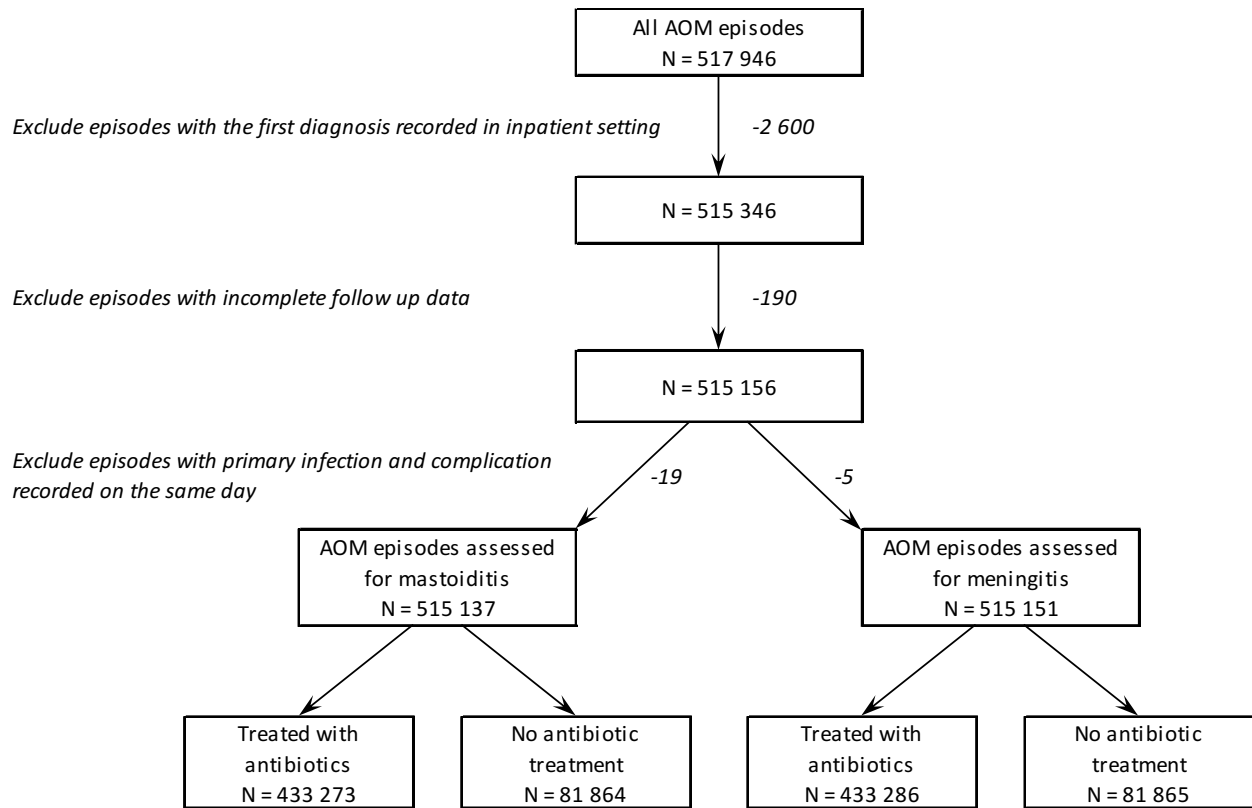

## 2. Tonsillitis cohort

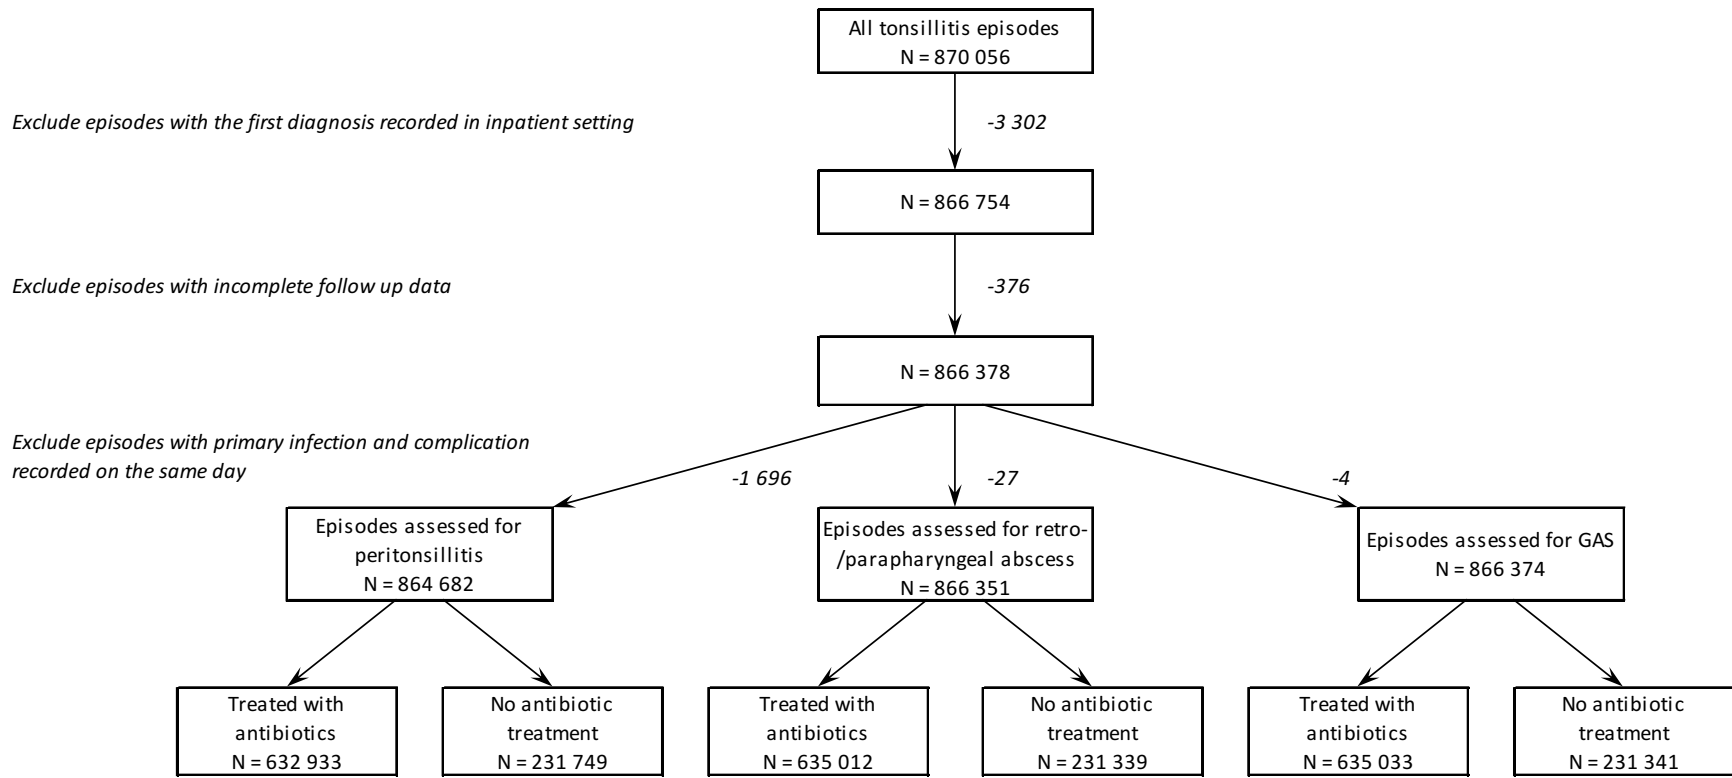

### 3. Acute sinusitis cohort

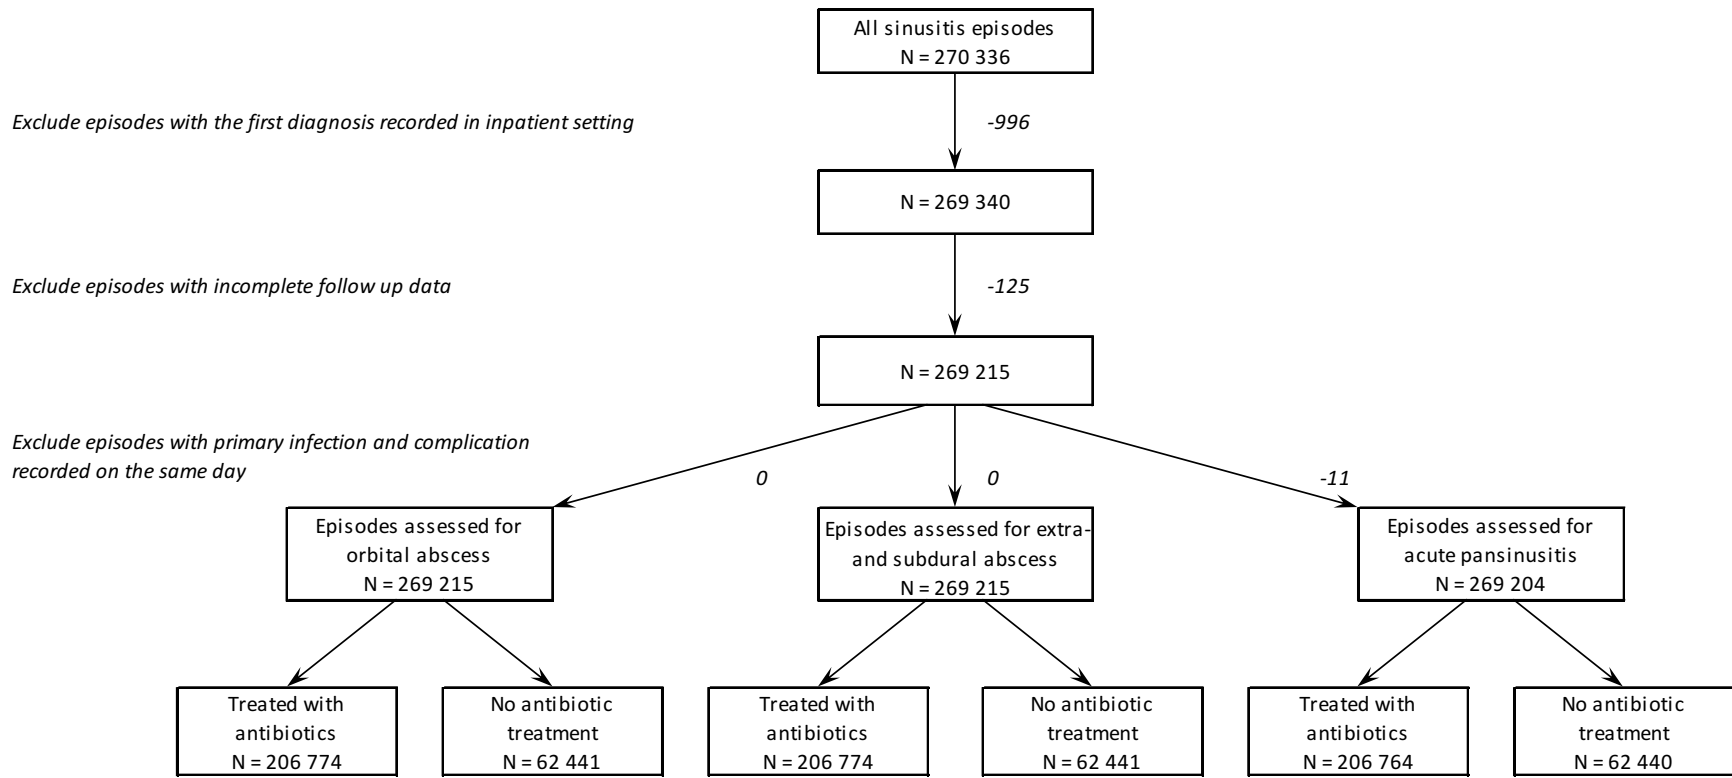

4. Acute sinusitis / acute upper respiratory tract infections of multiple and unspecified sites cohort

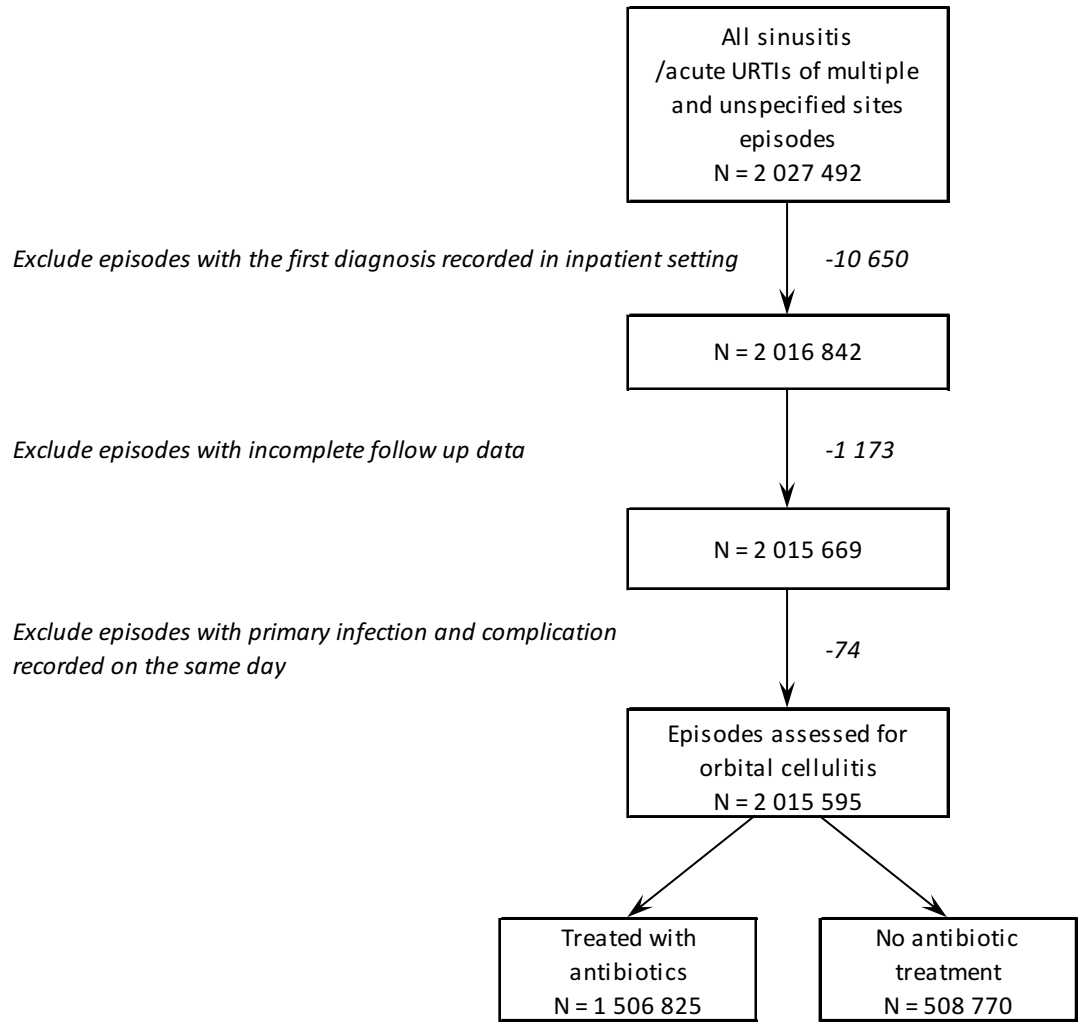

Supplement: bmjopen-2017-016221supp001.pdf [file bmjopen-2017-016221supp001.pdf]
